# Supplementary material
Source: PubMed Central journal article supplement (PMC1323166)
Supplement: pnas_0506637102_1.pdf [file pnas_0506637102_1.pdf]

**Table 2. Hematopoietic subpopulations investigated in the study**

| Hematopoietic subpopulations        | Markers                                                    |
|-------------------------------------|------------------------------------------------------------|
| Unfractionated stem/progenitor      | CD34 <sup>+</sup>                                          |
| Common myeloid progenitor           | CD34 <sup>+</sup> /CD117 <sup>+</sup> /CD45RA <sup>-</sup> |
| Granulocytic/monocytic progenitor   | CD34 <sup>+</sup> /CD117 <sup>+</sup> /CD45RA <sup>+</sup> |
| Neutrophils intermediate maturation | CD15 <sup>(+)</sup> /CD33 <sup>+</sup>                     |
| Mature neutrophils                  | CD15 <sup>++</sup> /CD33 <sup>(+)</sup>                    |
| Erythroblasts                       | CD71/GPA <sup>+</sup>                                      |
| Early pre-B cells                   | CD34 <sup>+</sup> /CD19 <sup>+</sup>                       |
| B lymphocytes                       | CD19 <sup>+</sup>                                          |
| T helper cells                      | CD3 <sup>+</sup> /CD4 <sup>+</sup>                         |
| T suppressor cells                  | CD3 <sup>+</sup> /CD8 <sup>+</sup>                         |
