# Supplementary material
Source: PubMed Central journal article supplement (PMC1323166)
Supplement: pnas_0506637102_2.pdf [file pnas_0506637102_2.pdf]

**Table 3. Results from the Taq-Man assay on for leukemias; two positive for the *TCF3/PBX1* and two negative**

| Sample           | Detector | CT    | Mean      | DCT      | DDCT     | Ratio sample/ref. |
|------------------|----------|-------|-----------|----------|----------|-------------------|
| <i>TCF3/PBX1</i> | FGF9     | 26.45 | 26.38     | 11.06    | -11.525  | 2946.9            |
|                  | 18S      | 15.3  | 15.32     |          |          |                   |
| <i>TCF3/PBX1</i> | FGF9     | 27.04 | 27.106667 | 10.51667 | -12.0683 | 4294.7            |
|                  | 18S      | 16.61 | 16.59     |          |          |                   |
| Other, ref.      | FGF9     | 38.3  | 38.275    | 22.585   | 0        | 1                 |
|                  | 18S      | 15.7  | 15.69     |          |          |                   |
| Other            | FGF9     | 34.42 | 34.53     | 18.04    | -4.545   | 23.3              |
|                  | 18S      | 16.45 | 16.49     |          |          |                   |
