# Supplementary material
Source: PubMed Central journal article supplement (PMC1323166)
Supplement: pnas_0506637102_3.pdf [file pnas_0506637102_3.pdf]

**Table 4. Results from the Taq-Man assay on for the *MERTK* gene. Two positive *TCF3/PBX1* samples and two negative samples were tested**

| Sample           | Detector | CT    | Mean     | DCT      | DDCT        | Ratio sample/ref |
|------------------|----------|-------|----------|----------|-------------|------------------|
| <i>TCF3/PBX1</i> | MERTK    | 26.18 | 26.205   | 9.61     | -5.345      | 40.6             |
|                  | 18S      | 16.66 | 16.595   |          |             |                  |
| <i>TCF3/PBX1</i> | MERTK    | 25.4  | 25.45    | 9.723333 | -5.23166667 | 37.6             |
|                  | 18S      | 15.77 | 15.72667 |          |             |                  |
| Other, reference | MERTK    | 32.12 | 32.16    | 14.955   | 0           | 1                |
|                  | 18S      | 17.29 | 17.205   |          |             |                  |
| Other            | MERTK    | 28.31 | 28.34    | 14.085   | -0.87       | 1.8              |
|                  | 18S      | 14.28 | 14.255   |          |             |                  |
