# Supplementary material
Source: PubMed Central journal article supplement (PMC1323166)
Supplement: pnas_0506637102_4.pdf [file pnas_0506637102_4.pdf]

**Table 5. Results from the Taq-Man assay on for the *PTPRK* gene. In total, four leukemic samples were tested; two were positive for the *ETV6/RUNX1*, and two were negative**

| Sample            | Detector | CT    | Mean   | DCT    | DDCT    | Ratio sample/ref. |
|-------------------|----------|-------|--------|--------|---------|-------------------|
| <i>ETV6/RUNX1</i> | PTPRK    | 24.19 | 24.145 | 7.02   | -10.765 | 1740.2            |
|                   | 18S      | 17.18 | 17.125 |        |         |                   |
| <i>ETV6/RUNX1</i> | PTPRK    | 24.6  | 24.64  | 7.495  | -10.29  | 1252              |
|                   | 18S      | 17.06 | 17.145 |        |         |                   |
| Other             | PTPRK    | 32.33 | 32.29  | 17.245 | -0.54   | 1.5               |
|                   | 18S      | 15.1  | 15.045 |        |         |                   |
| Other, ref.       | PTPRK    | 35.19 | 35.205 | 17.785 | 0       | 1                 |
|                   | 18S      | 17.4  | 17.42  |        |         |                   |
