# Supplementary material
Source: PubMed Central journal article supplement (PMC1323166)
Supplement: pnas_0506637102_5.pdf [file pnas_0506637102_5.pdf]

**Table 6. Results from the Taq-Man assay for the *IMP-1* gene for the leukemias; two samples positive for the *ETV6/RUNX1* and two negative were tested**

| Sample            | Detector | CT    | Mean   | DCT    | DDCT    | Ratio sample/ref. |
|-------------------|----------|-------|--------|--------|---------|-------------------|
| <i>ETV6/RUNX1</i> | IMP-1    | 25.06 | 25.15  | 9.815  | -16.44  | 88906.4           |
|                   | 18S      | 15.3  | 15.335 |        |         |                   |
| <i>ETV6/RUNX1</i> | IMP-1    | 24.45 | 24.525 | 10.86  | -15.395 | 43088.1           |
|                   | 18S      | 13.6  | 13.665 |        |         |                   |
| Other             | IMP-1    | 40.3  | 40.3   | 22.835 | -3.42   | 10.7              |
|                   | 18S      | 17.42 | 17.465 |        |         |                   |
| Other, ref.       | IMP-1    | 40.95 | 40.95  | 26.255 | 0       | 1                 |
|                   | 18S      | 14.83 | 14.695 |        |         |                   |
