# Supplementary material
Source: PubMed Central journal article supplement (PMC1323166)
Supplement: pnas_0506637102_6.pdf [file pnas_0506637102_6.pdf]

**Table 7. Results from the Taq-Man assay for the ZWCC2 gene for the leukemias; two samples were positive for the hyperdiploid, and two negative**

| Sample           | Detector | CT    | Mean     | DCT      | DDCT     | Ratio sample/ref |
|------------------|----------|-------|----------|----------|----------|------------------|
| Hyperdiploid     | ZCWCC2   | 28.22 | 28.29    | 13.915   | -2.72    | 6.6              |
|                  | 18S      | 14.42 | 14.375   |          |          |                  |
| Hyperdiploid     | ZCWCC2   | 26.74 | 26.775   | 11.985   | -4.65    | 25.1             |
|                  | 18S      | 14.74 | 14.79    |          |          |                  |
| Other            | ZCWCC2   | 35.47 | 35.44667 | 17.95167 | 1.316667 | 0.4              |
|                  | 18S      | 17.62 | 17.495   |          |          |                  |
| Other, reference | ZCWCC2   | 31.62 | 31.64    | 16.635   | 0        | 1                |
|                  | 18S      | 15.01 | 15.005   |          |          |                  |
