# Supplementary material
Source: PubMed Central journal article supplement (PMC1323166)
Supplement: pnas_0506637102_7.pdf [file pnas_0506637102_7.pdf]

**Table 8. Results from the Taq-Man assay for the *MEIS1* gene for the leukemias; six samples harbored *MLL* rearrangements, and six did not**

| Sample           | Detector | CT    | Mean   | DCT    | DDCT    | Ratio sample/ref. |
|------------------|----------|-------|--------|--------|---------|-------------------|
| <i>MLL</i>       | MEIS 1   | 26.31 | 26.255 | 13.145 | -8.53   | 369.6             |
|                  | 18S      | 13.1  | 13.11  |        |         |                   |
| <i>MLL</i>       | MEIS 1   | 22.61 | 23.505 | 10.32  | -11.355 | 2619.4            |
|                  | 18S      | 13.2  | 13.185 |        |         |                   |
| <i>MLL</i>       | MEIS 1   | 26.59 | 26.795 | 14.86  | -6.815  | 112.6             |
|                  | 18S      | 11.52 | 11.935 |        |         |                   |
| <i>MLL</i>       | MEIS 1   | 26.38 | 26.38  | 11.44  | -10.235 | 1205.2            |
|                  | 18S      | 14.55 | 14.94  |        |         |                   |
| <i>MLL</i>       | MEIS 1   | 26.71 | 26.68  | 13.39  | -8.285  | 311.9             |
|                  | 18S      | 12.9  | 13.29  |        |         |                   |
| <i>MLL</i>       | MEIS 1   | 25.84 | 25.42  | 11.445 | -10.23  | 1200.9            |
|                  | 18S      | 13.81 | 13.975 |        |         |                   |
| Other            | MEIS 1   | 34.04 | 34.115 | 18.76  | -2.915  | 7.5               |
|                  | 18S      | 15.37 | 15.355 |        |         |                   |
| Other            | MEIS 1   | 36.47 | 36.51  | 21.895 | 0.22    | 0.89              |
|                  | 18S      | 14.8  | 14.615 |        |         |                   |
| Other            | MEIS 1   | 39.16 | 39.16  | 23.885 | 2.21    | 0.22              |
|                  | 18S      | 15.23 | 15.275 |        |         |                   |
| Other            | MEIS 1   | 36.28 | 36.16  | 20.775 | -0.9    | 1.9               |
|                  | 18S      | 15.14 | 15.385 |        |         |                   |
| Other            | MEIS 1   | 35.98 | 36.2   | 21.27  | -0.405  | 1.3               |
|                  | 18S      | 14.8  | 14.93  |        |         |                   |
| Other, reference | MEIS 1   | 36.66 | 36.325 | 21.675 | 0       | 1                 |
|                  | 18S      | 14.63 | 14.65  |        |         |                   |
