# Supplementary material
Source: PubMed Central journal article supplement (PMC1323166)
Supplement: pnas_0506637102_8.pdf [file pnas_0506637102_8.pdf]

**Table 9. Results from the Taq-Man assay for the *PBX3* gene. Six samples harbored *MLL*-rearrangements, and six samples were controls**

| Sample      | Detector | CT    | Mean   | DCT    | DDCT   | Ratio sample/ref. |
|-------------|----------|-------|--------|--------|--------|-------------------|
| <i>MLL</i>  | PBX3     | 22.84 | 22.865 | 9.39   | -5.63  | 49.5              |
|             | 18S      | 13.54 | 13.475 |        |        |                   |
| Other       | PBX3     | 28.92 | 28.98  | 13.84  | -1.18  | 2.3               |
|             | 18S      | 15.19 | 15.14  |        |        |                   |
| <i>MLL</i>  | PBX3     | 23.22 | 23.22  | 12.06  | -2.96  | 7.8               |
|             | 18S      | 11.26 | 11.16  |        |        |                   |
| Other       | PBX3     | 27.55 | 27.48  | 13.445 | -1.575 | 3.0               |
|             | 18S      | 14.08 | 14.035 |        |        |                   |
| <i>MLL</i>  | PBX3     | 24.4  | 24.405 | 13.175 | -1.845 | 3.6               |
|             | 18S      | 11.22 | 11.23  |        |        |                   |
| Other       | PBX3     | 28.23 | 28.205 | 14.065 | -0.955 | 1.9               |
|             | 18S      | 14.14 | 14.14  |        |        |                   |
| Other       | PBX3     | 28.42 | 28.38  | 14.275 | -0.745 | 1.7               |
|             | 18S      | 14.15 | 14.105 |        |        |                   |
| <i>MLL</i>  | PBX3     | 24.31 | 24.31  | 12.375 | -2.645 | 6.3               |
|             | 18S      | 12.17 | 11.935 |        |        |                   |
| <i>MLL</i>  | PBX3     | 23.52 | 23.52  | 11.8   | -3.22  | 9.3               |
|             | 18S      | 11.81 | 11.72  |        |        |                   |
| Other       | PBX3     | 27.23 | 27.17  | 13.01  | -2.01  | 4.0               |
|             | 18S      | 14.16 | 14.22  |        |        |                   |
| <i>MLL</i>  | PBX3     | 24.16 | 24.195 | 10.46  | -4.56  | 23.6              |
|             | 18S      | 13.95 | 13.735 |        |        |                   |
| Other, ref. | PBX3     | 28.59 | 28.94  | 15.02  | 0      | 1                 |
|             | 18S      | 13.88 | 13.92  |        |        |                   |
