# Supplementary material
Source: PubMed Central journal article supplement (PMC1323166)
Supplement: pnas_0506637102_9.pdf [file pnas_0506637102_9.pdf]

**Table 10. The square norm distance calculated between the centroid of each leukemic subtype and the centroid of each of the hematopoietic subpopulations**

| $\geq 51$            | Distance       |
|----------------------|----------------|
| CD15(+)/CD33+        | 65.839         |
| CD15++               | 91.5482        |
| CD19+                | <b>55.8516</b> |
| CD3+/CD4+            | 77.0628        |
| CD3+/CD8+            | 73.513         |
| CD34+                | 67.2109        |
| CD34+/CD117+/CD45RA- | 68.0634        |
| CD34+/CD117+/CD45RA+ | 69.486         |
| CD34+/CD19+          | 56.2807        |
| CD71/GPA+            | 106.559        |

  

| <i>ETV6/RUNX1</i>    | Distance      |
|----------------------|---------------|
| CD15(+)/CD33+        | 69.9676       |
| CD15++               | 89.3149       |
| CD19+                | <b>57.773</b> |
| CD3+/CD4+            | 79.5457       |
| CD3+/CD8+            | 76.6356       |
| CD34+                | 72.2529       |
| CD34+/CD117+/CD45RA- | 72.7059       |
| CD34+/CD117+/CD45RA+ | 75.202        |
| CD34+/CD19+          | 59.3231       |
| CD71/GPA+            | 109.469       |

  

| <i>IGH/MYC</i>       | Distance       |
|----------------------|----------------|
| CD15(+)/CD33+        | 91.5305        |
| CD15++               | 114.581        |
| CD19+                | 73.6556        |
| CD3+/CD4+            | 95.1226        |
| CD3+/CD8+            | 92.8547        |
| CD34+                | 78.2864        |
| CD34+/CD117+/CD45RA- | 82.3755        |
| CD34+/CD117+/CD45RA+ | 82.8936        |
| CD34+/CD19+          | <b>73.1444</b> |
| CD71/GPA+            | 121.683        |

  

| <i>MLL</i>           | Distance       |
|----------------------|----------------|
| CD15(+)/CD33+        | <b>45.0765</b> |
| CD15++               | 78.0153        |
| CD19+                | 56.5365        |
| CD3+/CD4+            | 72.1904        |
| CD3+/CD8+            | 66.9908        |
| CD34+                | 59.1111        |
| CD34+/CD117+/CD45RA- | 63.1899        |
| CD34+/CD117+/CD45RA+ | 55.0291        |
| CD34+/CD19+          | 61.5025        |
| CD71/GPA+            | 107.499        |

  

| <i>TCF3/PBX1</i> | Distance |
|------------------|----------|
| CD15(+)/CD33+    | 79.1625  |
| CD15++           | 102.176  |
| CD19+            | 64.2394  |

|                      |               |
|----------------------|---------------|
| CD3+/CD4+            | 87.5702       |
| CD3+/CD8+            | 84.7813       |
| CD34+                | 68.819        |
| CD34+/CD117+/CD45RA- | 73.6777       |
| CD34+/CD117+/CD45RA+ | 73.1841       |
| CD34+/CD19+          | <b>53.425</b> |
| CD71/GPA+            | 115.98        |

---
