# Supplementary material
Source: PubMed Central journal article supplement (PMC1323166)
Supplement: pnas_0506637102_10.pdf [file pnas_0506637102_10.pdf]

**Table 11.** Number of unique genes as determined by discriminatory analysis ( $P \leq 0.001$ ) in clinical and genetic subtype

| <i>Group 1/Group 2</i>                  | <i>No of significant genes</i> | <i>Top 15 of the upregulated genes in clinical and genetic subtype</i>                                                           |
|-----------------------------------------|--------------------------------|----------------------------------------------------------------------------------------------------------------------------------|
| NBM and purified cells/B-lineage ALL    | 2750                           | <i>RGL1, LARGE, GUK1, TERF2, MGC23911, DSCR1, CTGF, NPR1, BCAR3, CSRP2, PSD3, NAV1, C9orf77, SLC41A1, S100A13</i>                |
| NBM and purified cells/T-ALL            | 1581                           | <i>TOX, TM4SF2, SH2D1A, UNR, EFTUD1, MAPRE1, Cep70, FXYD2, ATXN10, DKFZp779O175, ZMYND10, NUCKS, TUSC3, DKFZp667B0210, AF1Q</i>  |
| NBM and purified cells/AML              | 705                            | <i>APOC2, NETO2, FLJ14825, KYNU, CKM, PPGB, RHCG, MGC3265, MRPL33, CCT8, CHR2SYT, PTTG1IP, HIST1H2BK, APLP2, AK2</i>             |
| <i>TCF3/PBX1/B-lineage ALL</i>          | 510                            | <i>PBX1, SRCAP, FHOD3, UST, MLL2, ADARB1, IRF4, FGF9, MPP7, NFATC4, SYNPO, SLC27A2, KIAA1036, HTRA3, IGSF3</i>                   |
| <i>ETV6/RUNX1/B-lineage ALL</i>         | 683                            | <i>PTPRK, IMP-1, FARP1, NRN1, GNPDA1, SERF2, NLGN2, CALN1, TAF1, ENPP4, DPF3, COTL1, FYB, KIAA1671, TNFRSF21</i>                 |
| Hyperdiploid >50/B-lineage ALL          | 710                            | <i>ZCWCC2, PLP2, ITSNI, ATP6AP2, DSCR5, C6orf192, PRPS2, SH3KBP1, SH3BP5, MGC23937, EIF5, TMEM32, PROM1, KCNJ6, SCML1</i>        |
| <i>IGH@/MYC/B-lineage ALL</i>           | 357                            | <i>BMP7, SGEF, FRAS1, ITGA3, SSX2IP, MGC24039, MAPK12, DLEU1, LZTS1, C13orf21, EXOSC7, CAB39L, IGSF4, CFH, FZD3</i>              |
| <i>MLL(B-lineage ALL)/B-lineage ALL</i> | 89                             | <i>MEIS1, HOXA10, FLJ21127, PPM1H, C9orf52, LY86, PLA2G4A, ADD1, PCYT2, IMAGE3451454, SIAT4C, RUNX2, LGALS1, RGS16, RPL23AP7</i> |
| <i>MLL(AML)/AML</i>                     | 146                            | <i>PBX3, C2, MEIS1, LOC339005, BAZ2A, KIAA0992, HOXA10, IGSF4, C9orf123, SPOCK, LOC51760, COMTD1, HIP2, CLASP2, C6orf33</i>      |
| <i>MLL/AML and B-lineage ALL</i>        | 104                            | <i>MEIS1, HOXA10, PBX3, KIAA0992, C9orf123, BCAN, CAPG, PLA2G4A, CLASP2, C2, APOC2, LGALS1, AK2, SPOCK, WNT10B</i>               |
| P190 <i>BCR/ABL1/B-lineage ALL</i>      | 22                             | <i>KIAA1914, EMID1, P2RX1, BAALC, HMG3, OSTF1, CCL5, NEK3, FZD6, ARHGEF3, SH3BP5, MRPS22</i>                                     |
| NK/B-lineage ALL                        | 35                             | <i>LOC51035, INPP4A, GOLGA1, MAF, CBX7, MGC26694, ITGA4, XRCC4, NFATC3, FSTL4, LKAP, USP19, PSCD4, VPS52, RHOT2</i>              |
