# Supplementary material
Source: PubMed Central journal article supplement (PMC1323166)
Supplement: pnas_0506637102_11.pdf [file pnas_0506637102_11.pdf]

**Table 12. The top-100 differentially expressed genes in B lineage ALL vs. the NBM and normal hematopoietic cells**

| Accession no. | Gene name                                                                          | Gene symbol        | Entrez gene    | Reporter ID | Score*   | P      | Sign <sup>†</sup> |
|---------------|------------------------------------------------------------------------------------|--------------------|----------------|-------------|----------|--------|-------------------|
| BX089773      | Ral guanine nucleotide dissociation stimulator-like 1                              | RGL1               | 23179          | 360212      | 1.862733 | 0.0002 | +                 |
| AA029754      | Like-glycosyltransferase                                                           | LARGE              | 9215           | 470092      | 1.853312 | 0.0002 | +                 |
| AA683557      | Ral guanine nucleotide dissociation stimulator-like 1                              | RGL1               | 23179          | 505864      | 1.563837 | 0.0002 | +                 |
| AA490902      | Guanylate kinase 1                                                                 | GUK1               | 2987           | 824527      | 1.379727 | 0.0002 | +                 |
| BX090758      | Telomeric repeat binding factor 2                                                  | TERF2              | 7014           | 205335      | 1.345723 | 0.0002 | +                 |
| AA708152      | Transmembrane emp24 protein transport domain containing 6                          | MGC23911           | 146456         | 460798      | 1.345657 | 0.0002 | +                 |
| AW073325      | Down syndrome critical region gene 1                                               | DSCRI              | 1827           | 2556526     | 1.329242 | 0.0002 | +                 |
| AA598794      | Connective tissue growth factor                                                    | CTGF               | 1490           | 898092      | 1.325661 | 0.0002 | +                 |
| AI949742      | Natriuretic peptide receptor A/guanylate cyclase A (atriuretic peptide receptor A) | NPR1               | 4881           | 2470153     | 1.312974 | 0.0002 | +                 |
| AW007634      | Histidyl-tRNA synthetase 2                                                         | HARS2              | 92675          | 2511570     | 1.297933 | 0.0002 | -                 |
| N49045        | Breast cancer anti-estrogen resistance 3                                           | BCAR3              | 8412           | 279670      | 1.247417 | 0.0002 | +                 |
| T59334        | Cysteine and glycine-rich protein 2                                                | CSRP2              | 1466           | 75254       | 1.241858 | 0.0002 | +                 |
| AA416817      | Pleckstrin and Sec7 domain containing 3                                            | PSD3               | 23362          | 731240      | 1.235097 | 0.0002 | +                 |
| AA411668      | Neuron navigator 1                                                                 | NAV1               | 89796          | 753271      | 1.22918  | 0.0002 | +                 |
| N63781        | Chromosome 9 open reading frame 77                                                 | C9orf77            | 51104          | 293059      | 1.223212 | 0.0002 | +                 |
| BX107803      | Like-glycosyltransferase                                                           | LARGE              | 9215           | 197558      | 1.221584 | 0.0002 | +                 |
| N47214        | Transcribed locus                                                                  | 0                  | 0              | 280413      | 1.217079 | 0.0002 | +                 |
| AA705326      | Solute carrier family 41, member 1                                                 | SLC41A1            | 254428         | 462849      | 1.217034 | 0.0002 | +                 |
| BX092408      | S100 calcium binding protein A13                                                   | S100A13            | 6284           | 325513      | 1.21287  | 0.0002 | +                 |
| AA488889      | Early B cell factor                                                                | EBF                | 1879           | 824886      | 1.210478 | 0.0002 | +                 |
| AA897151      | Testis derived transcript (3 LIM domains)                                          | TES                | 26136          | 1466237     | 1.206966 | 0.0002 | -                 |
| AA479132      | Hypothetical protein MGC17943                                                      | MGC17943           | 90488          | 754192      | 1.206222 | 0.0002 | +                 |
| W74533        | Latrophilin 2                                                                      | LPHN2              | 23266          | 346583      | 1.203971 | 0.0002 | -                 |
| R83161        | GRB2-associated binding protein 1                                                  | GAB1               | 2549           | 194399      | 1.194992 | 0.0002 | +                 |
| CR744656      | Calmodulin regulated spectrin-associated protein 1                                 | CAMSAP1            | 157922         | 49228       | 1.194984 | 0.0002 | +                 |
| W85766        | GRB2-associated binding protein 1                                                  | GAB1               | 2549           | 416061      | 1.19398  | 0.0002 | +                 |
| W76395        | Melanoma associated gene                                                           | D2S448             | 7837           | 345601      | 1.192706 | 0.0002 | +                 |
| AI356709      | Melanoma associated gene                                                           | D2S448             | 7837           | 2012757     | 1.170167 | 0.0002 | +                 |
| R70508        | Cysteine-rich motor neuron 1                                                       | CRIM1              | 51232          | 141845      | 1.157149 | 0.0002 | +                 |
| N68193        | GRB2-associated binding protein 1                                                  | GAB1               | 2549           | 292272      | 1.154772 | 0.0002 | +                 |
| AA707167      | Early B cell factor                                                                | EBF                | 1879           | 451394      | 1.143987 | 0.0002 | +                 |
| AA151003      | Septin 11                                                                          | Sept11             | 55752          | 505032      | 1.132283 | 0.0002 | +                 |
| AI301815      | Pleckstrin homology domain containing, family G (with RhoGef domain) member 1      | PLEKHG1            | 57480          | 1901310     | 1.130945 | 0.0002 | +                 |
| AA448464      | Multiple cluster hits:381214 & 432419                                              | C21orf56 & MGC4677 | 84221 & 112597 | 782446      | 1.130311 | 0.0002 | -                 |
| AA005196      | Zinc finger protein 138 (clone pHZ-32)                                             | ZNF138             | 7697           | 429086      | 1.121234 | 0.0002 | +                 |
| AI015577      | Homolog of yeast INO80                                                             | INO80              | 54617          | 1636837     | 1.117714 | 0.0002 | +                 |
| AI380933      | CDNA FLJ34248 fis, clone FCBBF4000446                                              | 0                  | 0              | 2109112     | 1.11521  | 0.0002 | +                 |
| AA491191      | Interferon, gamma-inducible protein 16                                             | IFI16              | 3428           | 824602      | 1.107342 | 0.0002 | +                 |
| AA678226      | Talin 1                                                                            | TLN1               | 7094           | 430894      | 1.104417 | 0.0002 | -                 |
| BX093830      | CDNA FLJ37485 fis, clone BRAWH2014379                                              | 0                  | 0              | 786612      | 1.102379 | 0.0002 | +                 |
| AA404694      | PTK2 protein tyrosine kinase 2                                                     | PTK2               | 5747           | 724892      | 1.099251 | 0.0002 | +                 |
| AA448270      | Hypothetical protein MGC33630                                                      | MGC33630           | 144406         | 782838      | 1.095011 | 0.0002 | +                 |
| AA599005      | Laminin, gamma 1 (formerly LAMB2)                                                  | LAMC1              | 3915           | 897760      | 1.092641 | 0.0002 | +                 |
| T60135        | Monoglyceride lipase                                                               | MGLL               | 11343          | 81394       | 1.091577 | 0.0002 | -                 |

|          |                                                                                                                                                                  |                            |                |         |          |        |   |
|----------|------------------------------------------------------------------------------------------------------------------------------------------------------------------|----------------------------|----------------|---------|----------|--------|---|
| AA487460 | Stromal cell-derived factor 2-like 1                                                                                                                             | <i>DPYSL2</i>              | 1808           | 841620  | 1.090863 | 0.0002 | + |
| AA490735 | Cytochrome c oxidase subunit Va                                                                                                                                  | <i>COX5A</i>               | 9377           | 824068  | 1.080635 | 0.0002 | + |
| H23338   | Protein kinase C, epsilon                                                                                                                                        | <i>PRKCE</i>               | 5581           | 51986   | 1.079515 | 0.0002 | + |
| R10947   | Cytochrome c oxidase subunit VIIa polypeptide 2 like                                                                                                             | <i>COX7A2L</i>             | 9167           | 129146  | 1.073208 | 0.0002 | — |
| AA976561 | Asparaginase like 1                                                                                                                                              | <i>ASRGL1</i>              | 80150          | 1558655 | 1.073004 | 0.0002 | — |
| R56808   | Multiple cluster hits:26579 & 444619                                                                                                                             | <i>0 &amp; DXS9879E</i>    | 0 & 8270       | 41225   | 1.070818 | 0.0002 | + |
| AA495935 | Microsomal glutathione S-transferase 1                                                                                                                           | <i>MGST1</i>               | 4257           | 768443  | 1.070522 | 0.0002 | — |
| N99711   | Histone 1, H2bk                                                                                                                                                  | <i>HIST1H2BK</i>           | 85236          | 290841  | 1.066153 | 0.0002 | + |
| AA453304 | Transcribed locus, strongly similar to NP_005927.1 myeloid/lymphoid or mixed-lineage leukemia (trithorax homolog, Drosophila); translocated to, 4 [Homo sapiens] | <i>0</i>                   | 0              | 788155  | 1.061896 | 0.0002 | + |
| T69562   | Pyroglutamyl-peptidase I                                                                                                                                         | <i>PGPEP1</i>              | 54858          | 83506   | 1.059634 | 0.0002 | — |
| AA456435 | GRB2-associated binding protein 1                                                                                                                                | <i>GAB1</i>                | 2549           | 788405  | 1.058575 | 0.0002 | + |
| AI830988 | B cell linker                                                                                                                                                    | <i>BLNK</i>                | 29760          | 2409188 | 1.058467 | 0.0002 | + |
| N80054   | Full length insert cDNA clone ZA91F08                                                                                                                            | <i>0</i>                   | 0              | 299943  | 1.05708  | 0.0002 | + |
| AA486151 | Neuron navigator 1                                                                                                                                               | <i>NAV1</i>                | 89796          | 840777  | 1.056286 | 0.0002 | + |
| AA863424 | Dipeptidase 1 (renal)                                                                                                                                            | <i>DPEP1</i>               | 1800           | 1456900 | 1.054641 | 0.0002 | + |
| AA047338 | Proteasome (prosome, macropain) subunit, alpha type, 6                                                                                                           | <i>PSMA6</i>               | 5687           | 509495  | 1.054629 | 0.0002 | + |
| AA456845 | Phosphatase and actin regulator 2                                                                                                                                | <i>PHACTR2</i>             | 9749           | 815588  | 1.05081  | 0.0002 | - |
| AA011266 | Multiple cluster hits:87385 & 432616                                                                                                                             | <i>C7orf30 &amp; IMP-3</i> | 115416 & 10643 | 429494  | 1.048869 | 0.0002 | + |
| AA991507 | Selectin P ligand                                                                                                                                                | <i>SELPLG</i>              | 6404           | 1609625 | 1.045794 | 0.0002 | — |
| AA071235 | Aurora kinase B                                                                                                                                                  | <i>AURKB</i>               | 9212           | 531319  | 1.042825 | 0.0002 | + |
| H45966   | Cyclin-dependent kinase 9 (CDC2-related kinase)                                                                                                                  | <i>CDK9</i>                | 1025           | 184365  | 1.041096 | 0.0002 | + |
| AA700164 | Phosphatase and actin regulator 2                                                                                                                                | <i>PHACTR2</i>             | 9749           | 452417  | 1.039226 | 0.0002 | — |
| AI824948 | Telomerase reverse transcriptase                                                                                                                                 | <i>TERT</i>                | 7015           | 2304672 | 1.038918 | 0.0002 | + |
| AA987959 | Transcription factor 4                                                                                                                                           | <i>TCF4</i>                | 6925           | 1603442 | 1.033538 | 0.0002 | + |
| R33200   | Spastic paraplegia 20, spartin (Troyer syndrome)                                                                                                                 | <i>SPG20</i>               | 23111          | 135800  | 1.031475 | 0.0002 | — |
| AA021132 | Transcribed locus                                                                                                                                                | <i>0</i>                   | 0              | 364098  | 1.02752  | 0.0002 | + |
| BX100113 | Intercellular adhesion molecule 3                                                                                                                                | <i>ICAM3</i>               | 3385           | 754080  | 1.027461 | 0.0002 | — |
| AA699652 | RALBP1 associated Eps domain containing 2                                                                                                                        | <i>REPS2</i>               | 9185           | 436455  | 1.023902 | 0.0002 | + |
| N94362   | Solute carrier family 35, member E3                                                                                                                              | <i>SLC35E3</i>             | 55508          | 309486  | 1.022697 | 0.0002 | + |
| AA457138 | Frizzled homolog 8 (Drosophila)                                                                                                                                  | <i>FZD8</i>                | 8325           | 810459  | 1.022    | 0.0002 | + |
| AA036649 | TAF7 RNA polymerase II, TATA box binding protein (TBP)-associated factor, 55kDa                                                                                  | <i>TAF7</i>                | 6879           | 365930  | 1.019557 | 0.0002 | + |
| AI675889 | Neuropeptide Y                                                                                                                                                   | <i>NPY</i>                 | 4852           | 2314420 | 1.018292 | 0.0002 | + |
| AA453028 | Paired immunoglobulin-like type 2 receptor beta                                                                                                                  | <i>PILRB</i>               | 29990          | 788355  | 1.016402 | 0.0002 | + |
| AA933641 | Hypothetical protein FLJ20674                                                                                                                                    | <i>FLJ20674</i>            | 54621          | 1551151 | 1.016044 | 0.0002 | + |
| AI686016 | GRB2-associated binding protein 1                                                                                                                                | <i>GAB1</i>                | 2549           | 2248902 | 1.009668 | 0.0002 | + |
| AI538546 | Histidyl-tRNA synthetase 2                                                                                                                                       | <i>HARS2</i>               | 92675          | 2075029 | 1.008811 | 0.0002 | — |
| AA490922 | Hypothetical protein BC018415                                                                                                                                    | <i>LOC130617</i>           | 130617         | 824553  | 1.006749 | 0.0002 | — |
| N68512   | Hermansky-Pudlak syndrome 4                                                                                                                                      | <i>HPS4</i>                | 89781          | 294089  | 1.005311 | 0.0002 | + |
| AA708756 | Hect domain and RLD 6                                                                                                                                            | <i>HERC6</i>               | 55008          | 384526  | 1.003075 | 0.0002 | + |
| AA911661 | Homeo box B2                                                                                                                                                     | <i>HOXB2</i>               | 3212           | 1526826 | 1.002989 | 0.0002 | — |
| AA446789 | LIM protein (similar to rat protein kinase C-binding enigma)                                                                                                     | <i>LIM</i>                 | 10611          | 784168  | 1.000501 | 0.0002 | — |
| CR741637 | Transducin (beta)-like 1X-linked                                                                                                                                 | <i>TBL1X</i>               | 6907           | 712454  | 0.999427 | 0.0002 | + |
| AA670123 | KH domain containing, RNA binding, signal transduction associated 3                                                                                              | <i>KHDRBS3</i>             | 10656          | 844703  | 0.998818 | 0.0002 | + |
| AA928451 | Hypothetical protein FLJ36674                                                                                                                                    | <i>FLJ36674</i>            | 284040         | 1486534 | 0.998722 | 0.0002 | — |
| AA026692 | CDNA FLJ12931 fis, clone NT2RP2004861                                                                                                                            | <i>0</i>                   | 0              | 366591  | 0.997925 | 0.0002 | + |
| AA461518 | TAF7 RNA polymerase II, TATA box binding protein (TBP)-associated factor, 55kDa                                                                                  | <i>TAF7</i>                | 6879           | 795850  | 0.997269 | 0.0002 | + |
| AI360342 | RAB33A, member RAS oncogene family                                                                                                                               | <i>RAB33A</i>              | 9363           | 2019211 | 0.99195  | 0.0002 | — |
| R15978   | Similar to RIKEN cDNA 2210021J22                                                                                                                                 | <i>LOC150383</i>           | 150383         | 53245   | 0.991427 | 0.0002 | + |
| R23318   | Suppressor of cytokine signaling 2                                                                                                                               | <i>SOCS2</i>               | 8835           | 131073  | 0.991062 | 0.0002 | + |

|          |                                                      |                |        |         |          |        |   |
|----------|------------------------------------------------------|----------------|--------|---------|----------|--------|---|
| AI927284 | Lectin, galactoside-binding, soluble, 1 (galectin 1) | <i>LGALS1</i>  | 3956   | 2461050 | 0.990076 | 0.0002 | — |
| N71462   | Sex comb on midleg-like 2 (Drosophila)               | <i>SCML2</i>   | 10389  | 294913  | 0.990004 | 0.0002 | + |
| AA452955 | Solute carrier family 38, member 1                   | <i>SLC38A1</i> | 81539  | 788541  | 0.98639  | 0.0002 | + |
| BX113432 | Gamma-glutamyltransferase 2                          | <i>GGT2</i>    | 2679   | 2061465 | 0.986187 | 0.0002 | — |
| N51097   | Zinc finger protein 545                              | <i>ZNF545</i>  | 284406 | 281982  | 0.985471 | 0.0002 | + |
| H08899   | Isopentenyl-diphosphate delta isomerase              | <i>IDI1</i>    | 3422   | 44975   | 0.985334 | 0.0002 | + |
| AA278839 | Zinc finger protein (ZFD25)                          | <i>ZFD25</i>   | 51427  | 703844  | 0.985318 | 0.0002 | + |

\*Value from discriminatory analysis, with a high value indicating a high correlation with the classes.

†The plus (+) sign indicates relative up-regulation in B lineage ALL, the minus (–) sign indicates up-regulation in normal cells.
