# Supplementary material
Source: PubMed Central journal article supplement (PMC1323166)
Supplement: pnas_0506637102_12.pdf [file pnas_0506637102_12.pdf]

**Table 13. The top-100 differentially expressed genes in T cell ALL vs. the NBM and purified hematopoietic cells**

| Accession no. | Gene name                                                                                         | Gene symbol                | Entrez gene   | Reporter ID | Score*   | P      | Sign <sup>†</sup> |
|---------------|---------------------------------------------------------------------------------------------------|----------------------------|---------------|-------------|----------|--------|-------------------|
| T78679        | Thymus high-mobility group box protein TOX                                                        | <i>TOX</i>                 | 9760          | 24271       | 2.824665 | 0.0002 | +                 |
| BX108481      | Thymus high-mobility group box protein TOX                                                        | <i>TOX</i>                 | 9760          | 758298      | 2.069278 | 0.0002 | +                 |
| AA281064      | Multiple cluster hits:264887 & 549034                                                             | <i>LETM2 &amp; FGFR1</i>   | 137994 & 2260 | 711857      | 1.987403 | 0.0002 | +                 |
| N28443        | Chromosome 5 open reading frame 18                                                                | <i>C5orf18</i>             | 7905          | 263727      | 1.913595 | 0.0002 | -                 |
| N93505        | Transmembrane 4 superfamily member 2                                                              | <i>TM4SF2</i>              | 7102          | 307471      | 1.843258 | 0.0002 | +                 |
| AI183964      | Leprecan-like 2                                                                                   | <i>LEPREL2</i>             | 10536         | 1734754     | 1.835113 | 0.0002 | -                 |
| H99944        | Chromosome 5 open reading frame 18                                                                | <i>C5orf18</i>             | 7905          | 263267      | 1.830875 | 0.0002 | -                 |
| AI338791      | SH2 domain protein 1A, Duncan's disease (lymphoproliferative syndrome)                            | <i>SH2D1A</i>              | 4068          | 1951711     | 1.791226 | 0.0002 | -                 |
| H94627        | Upstream of NRAS                                                                                  | <i>UNR</i>                 | 7812          | 256284      | 1.758371 | 0.0002 | -                 |
| AA983573      | Elongation factor Tu GTP binding domain containing 1                                              | <i>EFTUD1</i>              | 79631         | 1559230     | 1.755958 | 0.0002 | +                 |
| AA001749      | Microtubule-associated protein, RP/EB family, member 1                                            | <i>MAPRE1</i>              | 22919         | 428223      | 1.704101 | 0.0002 | +                 |
| BX097169      | P10-binding protein                                                                               | <i>Cep70</i>               | 80321         | 256680      | 1.641818 | 0.0002 | +                 |
| AA775899      | FXVD domain containing ion transport regulator 2                                                  | <i>FXVD2</i>               | 486           | 453641      | 1.630669 | 0.0002 | +                 |
| AA451754      | Ataxin 10                                                                                         | <i>ATXN10</i>              | 25814         | 788714      | 1.62048  | 0.0002 | +                 |
| AA625567      | Hypothetical protein DKFZp779O175                                                                 | <i>DKFZp779O175</i>        | 374899        | 745283      | 1.613584 | 0.0002 | +                 |
| AI190537      | Zinc finger, MYND domain containing 10                                                            | <i>ZMYND10</i>             | 51364         | 1733262     | 1.588394 | 0.0002 | +                 |
| BX115028      | ATP-binding cassette, subB family B (MDR/TAP), member 1                                           | <i>ABCB1</i>               | 5243          | 502721      | 1.584404 | 0.0002 | -                 |
| AA485621      | Nuclear ubiquitous casein kinase and cyclin-dependent kinase substrate                            | <i>NUCKS</i>               | 64710         | 811067      | 1.572212 | 0.0002 | +                 |
| T63980        | Clone FLB3436 PRO0868 mRNA, complete cds                                                          | <i>0</i>                   | 0             | 79761       | 1.558033 | 0.0002 | +                 |
| N66008        | Tumor suppressor candidate 3                                                                      | <i>TUSC3</i>               | 7991          | 293859      | 1.535257 | 0.0002 | +                 |
| W15318        | Early B cell factor 3                                                                             | <i>DKFZp667B0210</i>       | 253738        | 322641      | 1.53043  | 0.0002 | -                 |
| CR744529      | Multiple cluster hits:82919 & 546346                                                              | <i>CUL2 &amp; KIAA1018</i> | 8453 & 22909  | 502496      | 1.529693 | 0.0002 | +                 |
| AA456008      | ALL1-fused gene from chromosome 1q                                                                | <i>AF1Q</i>                | 10962         | 812105      | 1.50708  | 0.0002 | +                 |
| N62195        | 3-hydroxy-3-methylglutaryl-Coenzyme A synthase 1 (soluble)                                        | <i>HMGCS1</i>              | 3157          | 290111      | 1.491484 | 0.0002 | +                 |
| AA630449      | Niemann-Pick disease, type C2                                                                     | <i>NPC2</i>                | 10577         | 854644      | 1.478618 | 0.0002 | -                 |
| AA447978      | Aldehyde dehydrogenase 1 family, member A2                                                        | <i>ALDH1A2</i>             | 8854          | 782730      | 1.477604 | 0.0002 | +                 |
| AW005865      | Brain-specific angiogenesis inhibitor 2                                                           | <i>BAI2</i>                | 576           | 2566064     | 1.477442 | 0.0002 | +                 |
| AA682402      | Major histocompatibility complex, class II, DR beta 4                                             | <i>HLA-DRB5</i>            | 3127          | 461769      | 1.469602 | 0.0002 | -                 |
| W60100        | Serine (or cysteine) proteinase inhibitor, clade B (ovalbumin), member 8                          | <i>SERPINB8</i>            | 5271          | 341978      | 1.467317 | 0.0002 | -                 |
| AA600186      | Hypothetical protein DKFZp762N1910                                                                | <i>DKFZp762N1910</i>       | 221092        | 950361      | 1.466649 | 0.0002 | +                 |
| AA676666      | SWI/SNF related, matrix associated, actin dependent regulator of chromatin, subfamily e, member 1 | <i>SMARCE1</i>             | 6605          | 896972      | 1.456007 | 0.0002 | +                 |
| BX094146      | Small EDRK-rich factor 2                                                                          | <i>SERF2</i>               | 10169         | 795427      | 1.45316  | 0.0002 | +                 |
| N89676        | Osteoglycin (osteoinductive factor, mimecan)                                                      | <i>OGN</i>                 | 4969          | 307053      | 1.45191  | 0.0002 | +                 |
| BX112910      | PALM2-AKAP2 protein                                                                               | <i>PALM2-AKAP2</i>         | 445815        | 282108      | 1.448482 | 0.0002 | +                 |
| AA043117      | Chromosome 9 open reading frame 9                                                                 | <i>C9orf9</i>              | 11092         | 486717      | 1.447629 | 0.0002 | +                 |
| AA488497      | Transcription factor 12 (HTF4, helix-loop-helix transcription factors 4)                          | <i>TCF12</i>               | 6938          | 843159      | 1.442182 | 0.0002 | +                 |
| AA047338      | Proteasome (prosome, macropain) subunit, alpha type, 6                                            | <i>PSMA6</i>               | 5687          | 509495      | 1.422169 | 0.0002 | +                 |
| H19003        | TBP-interacting protein                                                                           | <i>TIP120A</i>             | 55832         | 50905       | 1.407544 | 0.0002 | +                 |
| W96149        | KIAA1166                                                                                          | <i>KIAA1166</i>            | 55906         | 358549      | 1.397866 | 0.0002 | +                 |
| AA150254      | Placenta-specific 8                                                                               | <i>PLAC8</i>               | 51316         | 491644      | 1.387251 | 0.0002 | -                 |
| BX100923      | Cadherin 4, type 1, R-cadherin (retinal)                                                          | <i>CDH4</i>                | 1002          | 32777       | 1.384635 | 0.0002 | +                 |
| AA634006      | Actin, alpha 2, smooth muscle, aorta                                                              | <i>ACTA2</i>               | 59            | 868304      | 1.375127 | 0.0002 | -                 |
| BX282852      | RAP1, GTP-GDP dissociation stimulator 1                                                           | <i>RAP1GDS1</i>            | 5910          | 120128      | 1.367818 | 0.0002 | +                 |
| AA668821      | Chitinase 3-like 2                                                                                | <i>CHI3L2</i>              | 1117          | 854338      | 1.364322 | 0.0002 | +                 |
| AA699652      | RALBP1 associated Eps domain containing 2                                                         | <i>REPS2</i>               | 9185          | 436455      | 1.353389 | 0.0002 | +                 |

|          |                                                                            |                       |           |         |          |        |   |
|----------|----------------------------------------------------------------------------|-----------------------|-----------|---------|----------|--------|---|
| AA425723 | DKFZP564J0863 protein                                                      | <i>DKFZP564J0863</i>  | 25923     | 773375  | 1.351748 | 0.0002 | + |
| AA485773 | G-rich RNA sequence binding factor 1                                       | <i>GRSF1</i>          | 2926      | 840384  | 1.35138  | 0.0002 | + |
| N66197   | Heterogeneous nuclear ribonucleoprotein A3                                 | <i>HNRPA3</i>         | 220988    | 278630  | 1.350523 | 0.0002 | + |
| AA448127 | G kinase anchoring protein 1                                               | <i>GKAP1</i>          | 80318     | 782721  | 1.35022  | 0.0002 | + |
| AA664069 | Laminin, gamma 1 (formerly LAMB2)                                          | <i>LAMC1</i>          | 3915      | 855805  | 1.348414 | 0.0002 | - |
| AW028997 | Chaperonin containing TCP1, subunit 8 (theta)                              | <i>CCT8</i>           | 10694     | 2542182 | 1.34463  | 0.0002 | + |
| AA169699 | Hypothetical protein FLJ11171                                              | <i>FLJ11171</i>       | 55783     | 609910  | 1.33974  | 0.0002 | - |
| AA782380 | Hypothetical protein LOC255189                                             | <i>LOC255189</i>      | 255189    | 857442  | 1.33621  | 0.0002 | - |
| W73801   | Multiple cluster hits:147989 & 536516                                      | <i>CACNG1 &amp; 0</i> | 786 & 0   | 344091  | 1.335653 | 0.0002 | + |
| AA481250 | Chitinase 3-like 2                                                         | <i>CHI3L2</i>         | 1117      | 815214  | 1.335585 | 0.0002 | + |
| AA630100 | Hypothetical protein MGC17299                                              | <i>MGC17299</i>       | 128218    | 854691  | 1.333082 | 0.0002 | - |
| AA495935 | Microsomal glutathione S-transferase 1                                     | <i>MGST1</i>          | 4257      | 768443  | 1.332625 | 0.0002 | - |
| R56139   | Selenophosphate synthetase 1                                               | <i>SEPHS1</i>         | 22929     | 41295   | 1.32878  | 0.0002 | + |
| AA991864 | NEDD8-conjugating enzyme                                                   | <i>NCE2</i>           | 140739    | 1610453 | 1.32818  | 0.0002 | - |
| T63800   | Secretoglobin, family 1A, member 1 (uterglobin)                            | <i>SCGB1A1</i>        | 7356      | 81336   | 1.327902 | 0.0002 | - |
| AI936359 | Family with sequence similarity 50, member B                               | <i>FAM50B</i>         | 26240     | 2461731 | 1.326392 | 0.0002 | - |
| AA887201 | Chromosome 13 open reading frame 1                                         | <i>C13orf1</i>        | 57213     | 1501998 | 1.325416 | 0.0002 | - |
| AA937895 | CD99 antigen                                                               | <i>CD99</i>           | 4267      | 1435862 | 1.323486 | 0.0002 | + |
| BX092549 | Topoisomerase (DNA) II binding protein 1                                   | <i>TOPBP1</i>         | 11073     | 200136  | 1.322906 | 0.0002 | + |
| AA431505 | Solute carrier family 35, member D2                                        | <i>SLC35D2</i>        | 11046     | 782140  | 1.319582 | 0.0002 | - |
| AA486151 | Neuron navigator 1                                                         | <i>NAV1</i>           | 89796     | 840777  | 1.319128 | 0.0002 | - |
| BX112001 | Similar to transcription factor BTF3                                       | <i>MGC23908</i>       | 91408     | 824739  | 1.317554 | 0.0002 | + |
| AA490700 | Myosin, heavy polypeptide 10, non-muscle                                   | <i>MYH10</i>          | 4628      | 823886  | 1.315207 | 0.0002 | + |
| BX105075 | Cryptochrome 1 (photolyase-like)                                           | <i>CRY1</i>           | 1407      | 263087  | 1.315077 | 0.0002 | + |
| N74244   | Polybromo 1                                                                | <i>PBI</i>            | 55193     | 296883  | 1.312968 | 0.0002 | + |
| T55975   | PTK2 protein tyrosine kinase 2                                             | <i>PTK2</i>           | 5747      | 73222   | 1.311684 | 0.0002 | + |
| AA985421 | Interferon induced transmembrane protein 2 (1-8D)                          | <i>IFITM2</i>         | 10581     | 1592837 | 1.308958 | 0.0002 | - |
| AA922700 | Microtubule-associated protein, RP/EB family, member 1                     | <i>MAPRE1</i>         | 22919     | 1474323 | 1.305172 | 0.0002 | + |
| AA070388 | TBP-interacting protein                                                    | <i>TIP120A</i>        | 55832     | 531031  | 1.304351 | 0.0002 | + |
| AA482326 | Leucine zipper, down-regulated in cancer 1-like                            | <i>LDOC1L</i>         | 84247     | 840884  | 1.301825 | 0.0002 | + |
| AA121805 | RAB3C, member RAS oncogene family                                          | <i>RAB3C</i>          | 115827    | 565939  | 1.298994 | 0.0002 | - |
| AA609284 | EPH receptor B6                                                            | <i>EPHB6</i>          | 2051      | 1031552 | 1.298559 | 0.0002 | + |
| AA041396 | Tumor necrosis factor (ligand) superfamily, member 12                      | <i>TNFSF13</i>        | 8741      | 376475  | 1.297292 | 0.0002 | - |
| AA166917 | Plexin domain containing 2                                                 | <i>PLXDC2</i>         | 84898     | 593815  | 1.296824 | 0.0002 | - |
| AA670391 | HCCA2 protein                                                              | <i>HCCA2</i>          | 81532     | 878764  | 1.291996 | 0.0002 | + |
| BX094538 | PRO1310                                                                    | <i>0</i>              | 0         | 345152  | 1.288941 | 0.0002 | - |
| AA432068 | Transmembrane protein vezatin                                              | <i>VEZATIN</i>        | 55591     | 784113  | 1.28694  | 0.0002 | + |
| AI217523 | Transportin 2 (importin 3, karyopherin beta 2b)                            | <i>TNPO2</i>          | 30000     | 1845273 | 1.284486 | 0.0002 | + |
| AA779191 | Heterogeneous nuclear ribonucleoprotein R                                  | <i>HNRPR</i>          | 10236     | 453790  | 1.283208 | 0.0002 | + |
| AI609735 | Solute carrier family 2, (facilitated glucose transporter) member 8        | <i>SLC2A8</i>         | 29988     | 2105806 | 1.281897 | 0.0002 | - |
| H73731   | Multiple cluster hits:540343 & 549117                                      | <i>0 &amp; AOF2</i>   | 0 & 23028 | 214731  | 1.278331 | 0.0002 | + |
| AA406456 | Cell division cycle associated 7                                           | <i>CDCA7</i>          | 83879     | 753198  | 1.275668 | 0.0002 | + |
| R68376   | Hypothetical protein FLJ11712                                              | <i>FLJ11712</i>       | 79621     | 137890  | 1.274068 | 0.0002 | + |
| AA633658 | Amyloid beta (A4) precursor protein (protease nexin-II, Alzheimer disease) | <i>APP</i>            | 351       | 856575  | 1.273546 | 0.0002 | - |
| BX117755 | Multiple cluster hits:511722 & 549143                                      | <i>0 &amp; 0</i>      | 0 & 0     | 342256  | 1.271015 | 0.0002 | + |
| AA452753 | Ribosomal protein S6 kinase, 90kDa, polypeptide 1                          | <i>RPS6KA1</i>        | 6195      | 788511  | 1.270343 | 0.0002 | - |
| BX105452 | Chromosome 9 open reading frame 126                                        | <i>C9orf126</i>       | 286205    | 357420  | 1.268563 | 0.0002 | + |
| AA479998 | Protein arginine N-methyltransferase 7                                     | <i>PRMT7</i>          | 54496     | 753984  | 1.268508 | 0.0002 | + |
| AA620867 | Forkhead box P1                                                            | <i>FOXP1</i>          | 27086     | 1049346 | 1.267193 | 0.0002 | - |
| H17385   | Haloacid dehalogenase-like hydrolase domain containing 2                   | <i>HDHD2</i>          | 84064     | 50660   | 1.266916 | 0.0002 | + |

|          |                                                |                         |             |        |          |        |   |
|----------|------------------------------------------------|-------------------------|-------------|--------|----------|--------|---|
| AA292410 | Multiple cluster hits:436657 & 540696          | <i>CLU &amp; SLC6A8</i> | 1191 & 6535 | 725877 | 1.264882 | 0.0002 | - |
| AA629901 | Hypothetical protein MGC33510                  | <i>MGC33510</i>         | 254778      | 884658 | 1.264599 | 0.0002 | - |
| AI732182 | N-acetylated alpha-linked acidic dipeptidase 2 | <i>NAALADL2</i>         | 254827      | 884510 | 1.263516 | 0.0002 | - |
| AA451811 | Rho GTPase activating protein 21               | <i>ARHGAP21</i>         | 57584       | 795277 | 1.261859 | 0.0002 | + |
| N91921   | T cell receptor beta chain V3-D-J2.7-C2 region | <i>0</i>                | 0           | 306841 | 1.261851 | 0.0002 | + |

\*The plus (+) sign indicates relative up-regulation in T cell ALL, the minus (-) sign indicates up-regulation in normal cells.

†Value from discriminatory analysis, with a high value indicating a high correlation with the classes.
