# Supplementary material
Source: PubMed Central journal article supplement (PMC1323166)
Supplement: pnas_0506637102_13.pdf [file pnas_0506637102_13.pdf]

**Table 14. The top-100 differentially expressed genes in AML vs. the NBM and purified hematopoietic cells**

| Accession no. | Gene Name                                                                                                   | Gene symbol      | Entrez gene | Reporter ID | Score*   | P      | Sign <sup>†</sup> |
|---------------|-------------------------------------------------------------------------------------------------------------|------------------|-------------|-------------|----------|--------|-------------------|
| BX116210      | Apolipoprotein C-II                                                                                         | <i>APOC2</i>     | 344         | 809523      | 1.169498 | 0.0002 | +                 |
| AA630100      | Hypothetical protein MGC17299                                                                               | <i>MGC17299</i>  | 128218      | 854691      | 1.117027 | 0.0002 | -                 |
| AA456821      | Neuropilin (NRP) and tolloid (TLL)-like 2                                                                   | <i>NETO2</i>     | 81831       | 815556      | 1.110654 | 0.0002 | +                 |
| CR738764      | Hypothetical protein FLJ14825                                                                               | <i>FLJ14825</i>  | 84933       | 243088      | 1.109626 | 0.0002 | +                 |
| BX103681      | Kynureninase (L-kynurenine hydrolase)                                                                       | <i>KYNU</i>      | 8942        | 435890      | 1.098809 | 0.0002 | +                 |
| AA159578      | Leucine-rich repeats and immunoglobulin-like domains 1                                                      | <i>LRIG1</i>     | 26018       | 592594      | 1.081188 | 0.0002 | -                 |
| AI381323      | Creatine kinase, muscle                                                                                     | <i>CKM</i>       | 1158        | 2067890     | 1.04935  | 0.0002 | +                 |
| AA663309      | Paired related homeobox 1                                                                                   | <i>PRRX1</i>     | 5396        | 853367      | 1.04407  | 0.0002 | -                 |
| AA112149      | Hypothetical protein FLJ20674                                                                               | <i>FLJ20674</i>  | 54621       | 530403      | 1.043435 | 0.0002 | -                 |
| AA664069      | Laminin, gamma 1 (formerly LAMB2)                                                                           | <i>LAMC1</i>     | 3915        | 855805      | 1.025082 | 0.0002 | -                 |
| AA916327      | Protective protein for beta-galactosidase (galactosialidosis)                                               | <i>PPGB</i>      | 5476        | 1473289     | 1.006725 | 0.0002 | +                 |
| AA682861      | Par-6 partitioning defective 6 homolog beta (C. elegans)                                                    | <i>PARD6B</i>    | 84612       | 450398      | 0.995667 | 0.0002 | -                 |
| AA599173      | MYST histone acetyltransferase (monocytic leukemia) 3                                                       | <i>MYST3</i>     | 7994        | 949928      | 0.990522 | 0.0002 | -                 |
| AA864183      | Rhesus blood group, C glycoprotein                                                                          | <i>RHCG</i>      | 51458       | 1456468     | 0.972541 | 0.0002 | +                 |
| T52652        | Microtubule associated serine/threonine kinase-like                                                         | <i>MASTL</i>     | 84930       | 67187       | 0.960359 | 0.0002 | -                 |
| AA773304      | CDNA FLJ31660 fis, clone NT2RI2004410                                                                       | <i>0</i>         | 0           | 845037      | 0.956927 | 0.0002 | -                 |
| N50428        | Hypothetical protein FLJ30046                                                                               | <i>FLJ30046</i>  | 122060      | 280640      | 0.954817 | 0.0002 | -                 |
| AI635989      | Kynureninase (L-kynurenine hydrolase)                                                                       | <i>KYNU</i>      | 8942        | 2298080     | 0.950892 | 0.0002 | +                 |
| H99430        | CDNA FLJ14942 fis, A-PLACE1011185                                                                           | <i>0</i>         | 0           | 262268      | 0.944904 | 0.0002 | -                 |
| AA701491      | Hypothetical protein MGC3265                                                                                | <i>MGC3265</i>   | 78991       | 435447      | 0.938666 | 0.0002 | +                 |
| W52082        | Mitochondrial ribosomal protein L33                                                                         | <i>MRPL33</i>    | 9553        | 325520      | 0.935593 | 0.0002 | +                 |
| AW028997      | Chaperonin containing TCP1, subunit 8 (theta)                                                               | <i>CCT8</i>      | 10694       | 2542182     | 0.927684 | 0.0002 | +                 |
| T41071        | Full-length cDNA clone CSODJ001YJ05 of T cells (Jurkat cell line) Cot 10-normalized of Homo sapiens (human) | <i>0</i>         | 0           | 62093       | 0.923493 | 0.0002 | -                 |
| AA157021      | Chr2 synaptotagmin                                                                                          | <i>CHR2SYT</i>   | 57488       | 502586      | 0.915911 | 0.0002 | +                 |
| R26405        | CDNA FLJ14942 fis, A-PLACE1011185                                                                           | <i>0</i>         | 0           | 132250      | 0.914888 | 0.0002 | -                 |
| AA664237      | Synaptopodin                                                                                                | <i>SYNPO</i>     | 11346       | 855610      | 0.91443  | 0.0002 | -                 |
| N67262        | Zinc finger protein 135 (clone pHZ-17)                                                                      | <i>ZNF135</i>    | 7694        | 286378      | 0.913271 | 0.0002 | -                 |
| AA147452      | Pituitary tumor-transforming 1 interacting protein                                                          | <i>PTTG1IP</i>   | 754         | 505491      | 0.911735 | 0.0002 | +                 |
| AA629926      | Zinc finger protein 544                                                                                     | <i>ZNF544</i>    | 27300       | 884683      | 0.904568 | 0.0002 | -                 |
| T69073        | Chromosome 9 open reading frame 42                                                                          | <i>C9orf42</i>   | 116224      | 82290       | 0.899572 | 0.0002 | -                 |
| AA628243      | Myosin phosphatase-Rho interacting protein                                                                  | <i>M-RIP</i>     | 23164       | 1055769     | 0.896237 | 0.0002 | -                 |
| N99711        | Histone 1, H2bk                                                                                             | <i>HIST1H2BK</i> | 85236       | 290841      | 0.894307 | 0.0002 | +                 |
| AI365579      | KIAA1458 protein                                                                                            | <i>KIAA1458</i>  | 57606       | 1953632     | 0.893988 | 0.0002 | -                 |
| H89517        | Amyloid beta (A4) precursor-like protein 2                                                                  | <i>APLP2</i>     | 334         | 240249      | 0.89351  | 0.0002 | +                 |
| AI023006      | Coagulation factor II (thrombin) receptor-like 1                                                            | <i>F2RL1</i>     | 2150        | 1650942     | 0.891591 | 0.0002 | -                 |
| H10488        | Adenylate kinase 2                                                                                          | <i>AK2</i>       | 204         | 45464       | 0.89077  | 0.0002 | +                 |
| AI366160      | Dendrin                                                                                                     | <i>DDN</i>       | 23109       | 1955794     | 0.88625  | 0.0002 | -                 |
| AA156109      | Nucleosome assembly protein 1-like 2                                                                        | <i>NAP1L2</i>    | 4674        | 589853      | 0.881897 | 0.0002 | -                 |
| H17385        | Haloacid dehalogenase-like hydrolase domain containing 2                                                    | <i>HDHD2</i>     | 84064       | 50660       | 0.879821 | 0.0002 | +                 |
| AA169560      | DEAH (Asp-Glu-Ala-Asp/His) box polypeptide 57                                                               | <i>DHX57</i>     | 90957       | 594063      | 0.872627 | 0.0002 | -                 |
| H41237        | Neurexin 2                                                                                                  | <i>NRXN2</i>     | 9379        | 192481      | 0.871564 | 0.0002 | +                 |
| AA663075      | Similar to uroplakin 3B isoform b; uroplakin IIIb                                                           | <i>0</i>         | 402579      | 852568      | 0.871152 | 0.0002 | -                 |
| AA669536      | Gap junction protein, alpha 5, 40kDa (connexin 40)                                                          | <i>GJA5</i>      | 2702        | 853985      | 0.8675   | 0.0002 | -                 |
| T56056        | SEC63-like (S. cerevisiae)                                                                                  | <i>SEC63</i>     | 11231       | 73310       | 0.866118 | 0.0002 | -                 |
| T59421        | MSin3A-associated protein 130                                                                               | <i>SAP130</i>    | 79595       | 75884       | 0.864268 | 0.0002 | -                 |
| AA670380      | Candidate tumor suppressor in ovarian cancer 2                                                              | <i>DPH2L1</i>    | 1801        | 878468      | 0.859298 | 0.0002 | +                 |

|          |                                                                                 |                         |              |         |          |        |   |
|----------|---------------------------------------------------------------------------------|-------------------------|--------------|---------|----------|--------|---|
| T55547   | Hypothetical protein FLJ32954                                                   | <i>FLJ32954</i>         | 151393       | 73526   | 0.858786 | 0.0002 | - |
| AA669124 | TEA domain family member 2                                                      | <i>TEAD2</i>            | 8463         | 854570  | 0.857253 | 0.0002 | - |
| AA948039 | Kruppel-like factor 11                                                          | <i>KLF11</i>            | 8462         | 1416029 | 0.851779 | 0.0002 | + |
| AA683500 | Attractin                                                                       | <i>ATRN</i>             | 8455         | 505835  | 0.849647 | 0.0002 | + |
| AA489861 | Syntrophin, beta 2 (dystrophin-associated protein A1, 59kDa, basic component 2) | <i>SNTB2</i>            | 6645         | 839516  | 0.846418 | 0.0002 | - |
| AI207770 | Sulfotransferase family, cytosolic, 1A, phenol-preferring, member 1             | <i>SULT1A1</i>          | 6817         | 1953022 | 0.844942 | 0.0002 | - |
| AI955681 | Carboxylesterase 2 (intestine, liver)                                           | <i>CES2</i>             | 8824         | 2509616 | 0.844617 | 0.0002 | + |
| T40927   | Multiple cluster hits:104672 & 368372                                           | <i>DOC1 &amp; GPR21</i> | 11259 & 2844 | 61462   | 0.840349 | 0.0002 | - |
| AI873645 | Cyclin-dependent kinase 5                                                       | <i>CDK5</i>             | 1020         | 2437211 | 0.840164 | 0.0002 | + |
| AA452968 | Staufen, RNA binding protein, homolog 2 (Drosophila)                            | <i>STAU2</i>            | 27067        | 788549  | 0.837651 | 0.0002 | + |
| AA191433 | Met proto-oncogene (hepatocyte growth factor receptor)                          | <i>MET</i>              | 4233         | 626841  | 0.83718  | 0.0002 | - |
| T58582   | Tachykinin 3 (neuromedin K, neurokinin beta)                                    | <i>TAC3</i>             | 6866         | 69279   | 0.836932 | 0.0002 | - |
| T48312   | Multiple cluster hits:511916 & 547792                                           | <i>:ENSA &amp; 0</i>    | 2029 & 0     | 74070   | 0.836535 | 0.0002 | - |
| AI401528 | Hypothetical protein MGC34646                                                   | <i>MGC34646</i>         | 157807       | 2110073 | 0.830381 | 0.0002 | + |
| T68405   | Frizzled homolog 6 (Drosophila)                                                 | <i>FZD6</i>             | 8323         | 83297   | 0.828792 | 0.0002 | - |
| AA620421 | Doublecortin; lissencephaly, X-linked (doublecortin)                            | <i>DCX</i>              | 1641         | 951022  | 0.82559  | 0.0002 | - |
| AA464628 | Serine/threonine kinase 3 (STE20 homolog, yeast)                                | <i>STK3</i>             | 6788         | 810506  | 0.822947 | 0.0002 | + |
| AA028164 | 5'-3' exoribonuclease 2                                                         | <i>XRN2</i>             | 22803        | 364840  | 0.822401 | 0.0002 | + |
| AA486511 | Membrane-type 1 matrix metalloproteinase cytoplasmic tail binding protein-1     | <i>MTCBP-1</i>          | 55256        | 843126  | 0.821007 | 0.0002 | + |
| AA704486 | KIAA1280 protein                                                                | <i>KIAA1280</i>         | 55841        | 450754  | 0.819555 | 0.0002 | - |
| AA504239 | CGI-07 protein                                                                  | <i>CGI-07</i>           | 51068        | 825031  | 0.819402 | 0.0002 | + |
| AI821270 | Aspartyl-tRNA synthetase                                                        | <i>DARS</i>             | 1615         | 855413  | 0.815901 | 0.0002 | - |
| AA629901 | Hypothetical protein MGC33510                                                   | <i>MGC33510</i>         | 254778       | 884658  | 0.815835 | 0.0002 | - |
| AI675369 | Phospholipase A2-activating protein                                             | <i>PLAA</i>             | 9373         | 2313732 | 0.814341 | 0.0002 | + |
| AA219045 | Microtubule-associated protein 1B                                               | <i>MAP1B</i>            | 4131         | 629896  | 0.814021 | 0.0002 | + |
| AA455003 | General transcription factor IIIH, polypeptide 1, 62kDa                         | <i>GTF2H1</i>           | 2965         | 811942  | 0.813687 | 0.0002 | + |
| T49460   | Transcribed locus                                                               | <i>0</i>                | 0            | 67523   | 0.812694 | 0.0002 | - |
| AA082526 | Bromodomain adjacent to zinc finger domain, 1B                                  | <i>BAZ1B</i>            | 9031         | 366041  | 0.8081   | 0.0002 | - |
| AA416834 | WD repeat domain 41                                                             | <i>WDR41</i>            | 55255        | 731261  | 0.807851 | 0.0002 | + |
| AA521247 | Solute carrier family 25 (carnitine/acylcarnitine translocase), member 20       | <i>SLC25A20</i>         | 788          | 827152  | 0.807096 | 0.0002 | + |
| AA878899 | Galactosidase, beta 1                                                           | <i>GLB1</i>             | 2720         | 1493175 | 0.806781 | 0.0002 | + |
| AA143773 | FXD domain containing ion transport regulator 3                                 | <i>FXD3</i>             | 5349         | 588460  | 0.803884 | 0.0002 | - |
| AI205344 | Solute carrier family 43, member 2                                              | <i>SLC43A2</i>          | 124935       | 1952979 | 0.802871 | 0.0002 | - |
| AI733873 | Dedicator of cytokinesis 9                                                      | <i>DOCK9</i>            | 23348        | 593280  | 0.802842 | 0.0004 | - |
| W01360   | CDNA clone IMAGE:3542720                                                        | <i>0</i>                | 0            | 278540  | 0.801919 | 0.0002 | + |
| AA773329 | Transcribed locus                                                               | <i>0</i>                | 0            | 845700  | 0.80019  | 0.0002 | - |
| R43233   | MYST histone acetyltransferase (monocytic leukemia) 3                           | <i>MYST3</i>            | 7994         | 31887   | 0.799084 | 0.0002 | - |
| AA455475 | Dynein, cytoplasmic, intermediate polypeptide 2                                 | <i>DNCI2</i>            | 1781         | 809714  | 0.798209 | 0.0002 | + |
| T87514   | B lymphoma Mo-MLV insertion region (mouse)                                      | <i>BMI1</i>             | 648          | 115408  | 0.797943 | 0.0002 | + |
| AA171755 | Hypothetical protein DKFZp762F0713                                              | <i>DKFZp762F0713</i>    | 283554       | 594659  | 0.794907 | 0.0002 | - |
| AA489478 | Mitochondrial ribosomal protein L33                                             | <i>MRPL33</i>           | 9553         | 897448  | 0.794271 | 0.0002 | + |
| W39618   | Multiple cluster hits:491577 & 520283                                           | <i>MYST3 &amp; 0</i>    | 7994 & 0     | 322723  | 0.793719 | 0.0002 | - |
| AW007636 | Ubiquinol-cytochrome c reductase core protein II                                | <i>UQCRC2</i>           | 7385         | 2511553 | 0.792772 | 0.0002 | + |
| T62493   | K+ channel tetramerization protein                                              | <i>GMRP-1</i>           | 84280        | 79632   | 0.792713 | 0.0002 | - |
| AA599107 | Sideroflexin 1                                                                  | <i>SFXN1</i>            | 94081        | 950461  | 0.791738 | 0.0002 | - |
| R32354   | Hypothetical protein from EUROIMAGE 1669387                                     | <i>LOC56930</i>         | 56930        | 134976  | 0.790718 | 0.0002 | - |
| AI886127 | Nuclear domain 10 protein                                                       | <i>NDP52</i>            | 10241        | 2445606 | 0.790612 | 0.0002 | + |
| BX096578 | Multiple cluster hits:497145 & 509200                                           | <i>0 &amp; CTAGE5</i>   | 0 & 4253     | 155197  | 0.788432 | 0.0002 | + |
| R96668   | Chemokine (C-C motif) ligand 14                                                 | <i>CCL15</i>            | 6359         | 199663  | 0.787927 | 0.0002 | + |
| AA086292 | DKFZP564O0823 protein                                                           | <i>DKFZP564O0823</i>    | 25849        | 561851  | 0.785924 | 0.0002 | - |

|          |                                    |                      |       |         |          |        |   |
|----------|------------------------------------|----------------------|-------|---------|----------|--------|---|
| AA486628 | Early growth response 1            | <i>EGR1</i>          | 1958  | 840944  | 0.785592 | 0.0002 | + |
| AW072778 | Transcription factor CP2           | <i>TFCP2</i>         | 7024  | 2569025 | 0.785443 | 0.0002 | + |
| W86145   | Rho GTPase activating protein 5    | <i>ARHGAP5</i>       | 394   | 416256  | 0.784395 | 0.0002 | - |
| AA432292 | Hypothetical protein DKFZp434F0318 | <i>DKFZP434F0318</i> | 81575 | 781468  | 0.784385 | 0.0002 | - |

\*Value from discriminatory analysis, with a high value indicating a high correlation with the classes.

†The plus (+) sign indicates relative up-regulation in AMLs, the minus (-) sign indicates up-regulation in normal cells.
