# Supplementary material
Source: PubMed Central journal article supplement (PMC1323166)
Supplement: pnas_0506637102_14.pdf [file pnas_0506637102_14.pdf]

**Table 15. The top-100 differentially expressed genes in *TCF3/PBX1* vs. B lineage ALL**

| Accession no. | Gene name                                                                    | Gene symbol      | Entrez gene | Reporter ID | Score*   | P      | Sign <sup>†</sup> |
|---------------|------------------------------------------------------------------------------|------------------|-------------|-------------|----------|--------|-------------------|
| AA401304      | Pre-B cell leukemia transcription factor 1                                   | <i>PBX1</i>      | 5087        | 741880      | 6.789706 | 0.0002 | +                 |
| BX103840      | Snf2-related CBP activator protein                                           | <i>SRCAP</i>     | 10847       | 429446      | 2.993641 | 0.0002 | +                 |
| H22559        | Formin homology 2 domain containing 3                                        | <i>FHOD3</i>     | 80206       | 51807       | 2.974576 | 0.0002 | +                 |
| BX096523      | Uronyl-2-sulfotransferase                                                    | <i>UST</i>       | 10090       | 505335      | 2.717449 | 0.0002 | +                 |
| AI698719      | Myeloid/lymphoid or mixed-lineage leukemia 2                                 | <i>MLL2</i>      | 8085        | 2302544     | 2.255838 | 0.0002 | +                 |
| AA489331      | Adenosine deaminase, RNA-specific, B1 (RED1 homolog rat)                     | <i>ADARB1</i>    | 104         | 842939      | 2.227474 | 0.0002 | +                 |
| AA825491      | Interferon regulatory factor 4                                               | <i>IRF4</i>      | 3662        | 1358229     | 2.22339  | 0.0002 | +                 |
| AA946776      | Fibroblast growth factor 9 (glia-activating factor)                          | <i>FGF9</i>      | 2254        | 1589786     | 2.204253 | 0.0002 | +                 |
| AA009593      | Membrane protein, palmitoylated 7 (MAGUK p55 subfamily member 7)             | <i>MPP7</i>      | 143098      | 365517      | 2.168292 | 0.0002 | +                 |
| AA394127      | Nuclear factor of activated T cells, cytoplasmic, calcineurin-dependent 4    | <i>NFATC4</i>    | 4776        | 725649      | 2.131731 | 0.0002 | +                 |
| AA664237      | Synaptopodin                                                                 | <i>SYNPO</i>     | 11346       | 855610      | 2.105756 | 0.0002 | +                 |
| AI985408      | Solute carrier family 27 (fatty acid transporter), member 2                  | <i>SLC27A2</i>   | 11001       | 2496336     | 2.086332 | 0.0002 | +                 |
| AI360738      | KIAA1036                                                                     | <i>KIAA1036</i>  | 22846       | 2011138     | 1.942721 | 0.0002 | +                 |
| AA428394      | HtrA serine peptidase 3                                                      | <i>HTRA3</i>     | 94031       | 773558      | 1.907847 | 0.0002 | +                 |
| AA425618      | Immunoglobulin superfamily, member 3                                         | <i>IGSF3</i>     | 3321        | 773335      | 1.89824  | 0.0002 | +                 |
| R88680        | Hypothetical protein MGC10485                                                | <i>MGC10485</i>  | 112936      | 166530      | 1.878579 | 0.0002 | +                 |
| AA629903      | Hypothetical protein LOC143458                                               | <i>LOC143458</i> | 143458      | 884662      | 1.866895 | 0.0002 | +                 |
| BX105523      | HECT, C2 and WW domain containing E3 ubiquitin protein ligase 1              | <i>NEDL1</i>     | 23072       | 180885      | 1.860222 | 0.0002 | +                 |
| AI652019      | MAD2 mitotic arrest deficienT like 2 (yeast)                                 | <i>MAD2L2</i>    | 10459       | 2306860     | 1.811611 | 0.0002 | +                 |
| AA152294      | Presenilin 2 (Alzheimer disease 4)                                           | <i>PSEN2</i>     | 5664        | 491232      | 1.786587 | 0.0002 | +                 |
| AA504431      | Phosphatidylinositol 3,4,5-trisphosphate-dependent RAC exchanger 1           | <i>PREX1</i>     | 57580       | 825270      | 1.785102 | 0.0002 | -                 |
| AA430410      | Hypothetical protein LOC162073                                               | <i>LOC162073</i> | 162073      | 769947      | 1.769117 | 0.0002 | +                 |
| N50428        | Hypothetical protein FLJ30046                                                | <i>FLJ30046</i>  | 122060      | 280640      | 1.750699 | 0.0002 | +                 |
| N21334        | Abl interactor 2                                                             | <i>ABI2</i>      | 10152       | 265102      | 1.709876 | 0.0002 | +                 |
| AA426027      | Sorting nexin 3                                                              | <i>SNX3</i>      | 8724        | 757225      | 1.706259 | 0.0002 | -                 |
| AA430546      | KIAA0056 protein                                                             | <i>KIAA0056</i>  | 23310       | 770066      | 1.702361 | 0.0002 | +                 |
| AA056375      | Hypothetical protein from clone 643                                          | <i>LOC57228</i>  | 57228       | 509458      | 1.695667 | 0.0002 | -                 |
| AA131701      | Sperm autoantigenic protein 17                                               | <i>SPA17</i>     | 53340       | 503866      | 1.682566 | 0.0002 | +                 |
| AA485439      | CGI-146 protein                                                              | <i>PNAS-4</i>    | 51029       | 811058      | 1.654405 | 0.0002 | +                 |
| AA866153      | Protein inhibitor of activated STAT, 1                                       | <i>PIAS1</i>     | 8554        | 1469434     | 1.649264 | 0.0002 | -                 |
| N95435        | Putative G protein coupled receptor                                          | <i>GPR</i>       | 11245       | 309929      | 1.612058 | 0.0002 | +                 |
| R26176        | Signal transducer and activator of transcription 5B                          | <i>STAT5B</i>    | 6777        | 132857      | 1.598807 | 0.0002 | +                 |
| AA428001      | Activated Cdc42-associated kinase 1                                          | <i>ACK1</i>      | 10188       | 773478      | 1.581865 | 0.0002 | +                 |
| AA465494      | Acyl-CoA synthetase long-chain family member 5                               | <i>ACSL5</i>     | 51703       | 814053      | 1.57759  | 0.0002 | -                 |
| AA460074      | Protein kinase, cAMP-dependent, catalytic, beta                              | <i>PRKACB</i>    | 5567        | 796442      | 1.542128 | 0.0002 | -                 |
| AA453028      | Paired immunoglobulin-like type 2 receptor beta                              | <i>PILRB</i>     | 29990       | 788355      | 1.53357  | 0.0002 | -                 |
| AA447661      | Sestrin 1                                                                    | <i>SESN1</i>     | 27244       | 813584      | 1.532933 | 0.0002 | -                 |
| BX101090      | Bone morphogenetic protein 2                                                 | <i>BMP2</i>      | 650         | 359610      | 1.526689 | 0.0002 | -                 |
| T53169        | KIAA2002 protein                                                             | <i>KIAA2002</i>  | 79834       | 68534       | 1.522924 | 0.0002 | -                 |
| AA424629      | Latent transforming growth factor beta binding protein 2                     | <i>LTBP2</i>     | 4053        | 767202      | 1.519619 | 0.0002 | +                 |
| W02963        | Fc receptor homolog expressed in B cells                                     | <i>FREB</i>      | 84824       | 291871      | 1.495679 | 0.0002 | +                 |
| AA663910      | Golgi autoantigen, golgin subfamily a, 3                                     | <i>GOLGA3</i>    | 2802        | 855684      | 1.476934 | 0.0002 | +                 |
| BX105103      | Leucine rich repeat containing 28                                            | <i>LRRC28</i>    | 123355      | 198694      | 1.44743  | 0.0002 | +                 |
| BX098872      | Hypothetical protein LOC339290                                               | <i>LOC339290</i> | 339290      | 767347      | 1.445433 | 0.0002 | -                 |
| AI651167      | Similar to tripartite motif-containing 16; estrogen-responsive B box protein | <i>0</i>         | 147166      | 2298710     | 1.436844 | 0.0002 | +                 |
| AA458653      | Tribbles homolog 2 (Drosophila)                                              | <i>TRIB2</i>     | 28951       | 813426      | 1.422705 | 0.0002 | +                 |

|          |                                                                                                        |                       |               |         |          |        |   |
|----------|--------------------------------------------------------------------------------------------------------|-----------------------|---------------|---------|----------|--------|---|
| AA465338 | KIAA0922 protein                                                                                       | <i>KIAA0922</i>       | 23240         | 814062  | 1.421449 | 0.0002 | + |
| AA442959 | 6-pyruvoyl-tetrahydropterin synthase/dimerization cofactor of hepatocyte nuclear factor 1 alpha (TCF1) | <i>PCBD</i>           | 5092          | 809421  | 1.418735 | 0.0002 | + |
| AA165567 | Mitogen-activated protein kinase kinase kinase 1                                                       | <i>MAP3K1</i>         | 4214          | 593306  | 1.404356 | 0.0002 | + |
| BX089984 | TEA domain family member 4                                                                             | <i>TEAD4</i>          | 7004          | 346696  | 1.389153 | 0.0002 | + |
| AA460115 | Ornithine decarboxylase 1                                                                              | <i>ODC1</i>           | 4953          | 796646  | 1.373093 | 0.0002 | + |
| AA479102 | Protein kinase C, beta 1                                                                               | <i>PRKCB1</i>         | 5579          | 753923  | 1.365389 | 0.0002 | - |
| BX099314 | Chemokine-like factor super family 7                                                                   | <i>CKLFSF7</i>        | 112616        | 810002  | 1.363653 | 0.0002 | + |
| AA866113 | Amyloid beta (A4) precursor protein-binding, family B, member 2 (Fe65-like)                            | <i>APBB2</i>          | 323           | 1470333 | 1.359986 | 0.0002 | + |
| AA436591 | C-mer proto-oncogene tyrosine kinase                                                                   | <i>MERTK</i>          | 10461         | 753069  | 1.359224 | 0.0002 | + |
| AA406353 | Programmed cell death 6                                                                                | <i>PDCD6</i>          | 10016         | 753193  | 1.356233 | 0.0002 | + |
| AI018794 | KIAA1545 protein                                                                                       | <i>KIAA1545</i>       | 57666         | 1639072 | 1.349509 | 0.0002 | + |
| AA455565 | Transmembrane protein 9                                                                                | <i>TMEM9</i>          | 252839        | 813488  | 1.345981 | 0.0002 | + |
| R78328   | CDC2-related protein kinase 7                                                                          | <i>CRK7</i>           | 51755         | 145743  | 1.339453 | 0.0002 | - |
| CR743281 | CHK1 checkpoint homolog (S. pombe)                                                                     | <i>CHEK1</i>          | 1111          | 246524  | 1.322281 | 0.0002 | + |
| AA001874 | Solute carrier family 9 (sodium/hydrogen exchanger), isoform 9                                         | <i>SLC9A9</i>         | 285195        | 428163  | 1.314457 | 0.0002 | - |
| AA464605 | Ankyrin repeat domain 15                                                                               | <i>ANKRD15</i>        | 23189         | 812975  | 1.314367 | 0.0002 | + |
| H09923   | Poly (ADP-ribose) polymerase family, member 1                                                          | <i>PARP1</i>          | 142           | 46248   | 1.31262  | 0.0002 | + |
| AA046939 | Multiple cluster hits:351680 & 516515                                                                  | <i>0 &amp; 0</i>      | 0 & 0         | 376866  | 1.310724 | 0.0002 | + |
| W24806   | Myosin IB                                                                                              | <i>MYO1B</i>          | 4430          | 308231  | 1.304389 | 0.0004 | - |
| AA156032 | SH3-domain binding protein 4                                                                           | <i>SH3BP4</i>         | 23677         | 590145  | 1.302441 | 0.0002 | + |
| N52267   | Adaptor-related protein complex 2, beta 1 subunit                                                      | <i>AP2B1</i>          | 163           | 245853  | 1.302259 | 0.0002 | + |
| AI948737 | V-ral simian leukemia viral oncogene homolog B (ras related; GTP binding protein)                      | <i>RALB</i>           | 5899          | 2472305 | 1.300859 | 0.0002 | - |
| AI681896 | Glucuronidase, beta                                                                                    | <i>GUSB</i>           | 2990          | 2273001 | 1.296679 | 0.0002 | - |
| AI364374 | Serine threonine kinase 39 (STE20/SPS1 homolog, yeast)                                                 | <i>STK39</i>          | 27347         | 2018084 | 1.295992 | 0.0002 | + |
| AA706935 | Exostoses (multiple)-like 3                                                                            | <i>EXTL3</i>          | 2137          | 451871  | 1.288723 | 0.0002 | + |
| AA429248 | HGFL gene                                                                                              | <i>MGC17330</i>       | 113791        | 769796  | 1.286347 | 0.0002 | - |
| AA454591 | Multiple cluster hits:33333 & 388613                                                                   | <i>0 &amp; NEO1</i>   | 388134 & 4756 | 811562  | 1.283757 | 0.0002 | - |
| AA150060 | Multiple cluster hits:409081 & 534399                                                                  | <i>KMO &amp; OPN3</i> | 8564 & 23596  | 504461  | 1.283016 | 0.0002 | + |
| AA887320 | SH3 multiple domains 1                                                                                 | <i>SH3MD1</i>         | 9644          | 1500815 | 1.28111  | 0.0002 | + |
| BX111769 | Calcium/calmodulin-dependent protein kinase (CaM kinase) II delta                                      | <i>CAMK2D</i>         | 817           | 713271  | 1.276468 | 0.0002 | + |
| AI343711 | Aldehyde oxidase 1                                                                                     | <i>AOX1</i>           | 316           | 1917741 | 1.276295 | 0.0002 | + |
| AA025434 | Family with sequence similarity 3, member D                                                            | <i>FAM3D</i>          | 131177        | 365707  | 1.270146 | 0.0002 | + |
| W52272   | GLI pathogenesis-related 1 (glioma)                                                                    | <i>GLIPR1</i>         | 11010         | 325365  | 1.261286 | 0.0002 | - |
| AI359066 | Small nuclear ribonucleoprotein polypeptide E                                                          | <i>SNRPE</i>          | 6635          | 2013064 | 1.253826 | 0.0002 | + |
| AA463323 | Chromosome 6 open reading frame 111                                                                    | <i>C6orf111</i>       | 25957         | 796921  | 1.243455 | 0.0002 | - |
| AA488885 | Zinc finger protein 106 homolog (mouse)                                                                | <i>SH3BP3</i>         | 64397         | 824875  | 1.240043 | 0.0002 | - |
| T59658   | Anthrax toxin receptor 2                                                                               | <i>ANTXR2</i>         | 118429        | 76169   | 1.238864 | 0.0002 | - |
| AA446021 | RNA binding motif protein 17                                                                           | <i>RBM17</i>          | 84991         | 781026  | 1.229704 | 0.0002 | - |
| AA449133 | CTP synthase                                                                                           | <i>CTPS</i>           | 1503          | 785389  | 1.229429 | 0.0002 | + |
| BX103225 | Multiple cluster hits:149156 & 547053                                                                  | <i>GLDC &amp; 0</i>   | 2731 & 0      | 248261  | 1.219708 | 0.0002 | + |
| AA478659 | Nidogen 2 (osteonidogen)                                                                               | <i>NID2</i>           | 22795         | 754093  | 1.214565 | 0.0004 | + |
| AA452824 | Sema domain, transmembrane domain (TM), and cytoplasmic domain, (semaphorin) 6D                        | <i>SEMA6D</i>         | 80031         | 788558  | 1.213493 | 0.0002 | + |
| AA418036 | GLI-Kruppel family member GLI3 (Greig cephalopolysyndactyly syndrome)                                  | <i>GLI3</i>           | 2737          | 767495  | 1.210923 | 0.0004 | + |
| N53376   | Phosphoinositide-3-kinase, regulatory subunit 5, p101                                                  | <i>PIK3R5</i>         | 23533         | 284004  | 1.210693 | 0.0002 | - |
| W24873   | Fucosidase, alpha-L- 1, tissue                                                                         | <i>FUCA1</i>          | 2517          | 308437  | 1.210151 | 0.0002 | - |
| CR736732 | 6-phosphofructo-2-kinase/fructose-2,6-biphosphatase 2                                                  | <i>PFKFB2</i>         | 5208          | 325526  | 1.208099 | 0.0002 | - |
| H85272   | Rab9 effector p40                                                                                      | <i>RAB9P40</i>        | 10244         | 249606  | 1.206883 | 0.0002 | - |
| AA480983 | Formin binding protein 1                                                                               | <i>FNBP1</i>          | 23048         | 814620  | 1.204156 | 0.0002 | - |
| AA282272 | Acyl-Coenzyme A dehydrogenase family, member 8                                                         | <i>ACAD8</i>          | 27034         | 712950  | 1.20383  | 0.0002 | + |

|          |                                                 |                  |        |         |          |        |   |
|----------|-------------------------------------------------|------------------|--------|---------|----------|--------|---|
| AA133536 | Hypothetical protein LOC147111                  | <i>LOC147111</i> | 147111 | 490718  | 1.202535 | 0.0002 | - |
| N35393   | IQ motif containing E                           | <i>IQCE</i>      | 23288  | 272100  | 1.19899  | 0.0002 | + |
| AI628353 | KIAA0882 protein                                | <i>KIAA0882</i>  | 23158  | 2284924 | 1.191246 | 0.0002 | - |
| R23318   | Suppressor of cytokine signaling 2              | <i>SOCS2</i>     | 8835   | 131073  | 1.18908  | 0.0002 | - |
| N31952   | Methylcrotonoyl-Coenzyme A carboxylase 2 (beta) | <i>MCCC2</i>     | 64087  | 259374  | 1.187251 | 0.0002 | + |

\*Value from discriminatory analysis, with a high value indicating a high correlation with the classes.

†The plus (+) sign indicates relative up-regulation in *TCF3/PBX1*-positive ALLs, the minus (-) sign indicates up-regulation in the remaining ALLs.
