# Supplementary material
Source: PubMed Central journal article supplement (PMC1323166)
Supplement: pnas_0506637102_16.pdf [file pnas_0506637102_16.pdf]

**Table 17. The top-100 differentially expressed genes in *ETV6/RUNX1* vs. B lineage ALL**

| Accession no. | Gene name                                                                                            | Gene symbol      | Entrez gene | Reporter ID | Score*   | P      | Sign <sup>†</sup> |
|---------------|------------------------------------------------------------------------------------------------------|------------------|-------------|-------------|----------|--------|-------------------|
| R78776        | Protein tyrosine phosphatase, receptor type, K                                                       | <i>PTPRK</i>     | 5796        | 146123      | 1.580781 | 0.0002 | +                 |
| H59805        | IGF-II mRNA-binding protein 1                                                                        | <i>IMP-1</i>     | 10642       | 208078      | 1.547667 | 0.0002 | +                 |
| AA496796      | FERM, RhoGEF (ARHGEF) and pleckstrin domain protein 1 (chondrocyte-derived)                          | <i>FARP1</i>     | 10160       | 897656      | 1.249147 | 0.0002 | +                 |
| R67704        | Neuritin 1                                                                                           | <i>NRN1</i>      | 51299       | 140197      | 1.175817 | 0.0002 | +                 |
| AA460143      | Glucosamine-6-phosphate deaminase 1                                                                  | <i>GNPDA1</i>    | 10007       | 795882      | 1.166299 | 0.0002 | +                 |
| BX094146      | Small EDRK-rich factor 2                                                                             | <i>SERF2</i>     | 10169       | 795427      | 1.148062 | 0.0002 | +                 |
| AA704802      | Neuroigin 2                                                                                          | <i>NLGN2</i>     | 57555       | 452466      | 1.132773 | 0.0002 | +                 |
| BX109808      | Calneuron 1                                                                                          | <i>CALN1</i>     | 83698       | 27916       | 1.107754 | 0.0002 | +                 |
| R05810        | Transcribed locus, moderately similar to NP_055301.1 neuronal thread protein AD7c-NTP [Homo sapiens] | <i>0</i>         | 0           | 125311      | 1.084982 | 0.0002 | +                 |
| H23443        | TAFAl protein                                                                                        | <i>TAFAl</i>     | 407738      | 51993       | 1.067121 | 0.0002 | +                 |
| N51740        | Ectonucleotide pyrophosphatase/phosphodiesterase 4 (putative function)                               | <i>ENPP4</i>     | 22875       | 281737      | 1.059574 | 0.0002 | +                 |
| R02269        | D4, zinc and double PHD fingers, family 3                                                            | <i>DPF3</i>      | 8110        | 124530      | 1.01205  | 0.0002 | +                 |
| W52208        | Coactosin-like 1 (Dictyostelium)                                                                     | <i>COTL1</i>     | 23406       | 325370      | 1.01102  | 0.0002 | +                 |
| BX100679      | FYN binding protein (FYB 120/130)                                                                    | <i>FYB</i>       | 2533        | 293325      | 1.004786 | 0.0002 | +                 |
| N49774        | KIAA1671 protein                                                                                     | <i>KIAA1671</i>  | 85379       | 282404      | 0.976661 | 0.0002 | +                 |
| H98981        | Myeloid-associated differentiation marker                                                            | <i>MYADM</i>     | 91663       | 261444      | 0.975919 | 0.0002 | +                 |
| AA490494      | Tumor necrosis factor receptor superfamily, member 21                                                | <i>TNFRSF21</i>  | 27242       | 823902      | 0.969868 | 0.0002 | +                 |
| AA621510      | Zinc finger protein 219                                                                              | <i>ZNF219</i>    | 51222       | 1055297     | 0.956131 | 0.0002 | +                 |
| AA292215      | Zinc finger and BTB domain containing 34                                                             | <i>ZBTB34</i>    | 403341      | 725745      | 0.952181 | 0.0002 | +                 |
| AA487510      | Mindbomb homolog 1 (Drosophila)                                                                      | <i>MIB1</i>      | 57534       | 839060      | 0.947612 | 0.0002 | +                 |
| AI362933      | Death-associated protein kinase 2                                                                    | <i>DAPK2</i>     | 23604       | 2018423     | 0.94269  | 0.0002 | +                 |
| AA999901      | Guanine nucleotide binding protein (G protein), gamma 11                                             | <i>GNG11</i>     | 2791        | 1636447     | 0.927219 | 0.0002 | +                 |
| T66109        | Core-binding factor, runt domain, alpha subunit 2; translocated to, 3                                | <i>CBFA2T3</i>   | 863         | 21684       | 0.910589 | 0.0002 | +                 |
| H17035        | Zinc finger, DHHC domain containing 3                                                                | <i>ZDHHC3</i>    | 51304       | 50581       | 0.906465 | 0.0002 | +                 |
| BX096730      | Transgelin 3                                                                                         | <i>TAGLN3</i>    | 29114       | 325160      | 0.901741 | 0.0002 | +                 |
| N24824        | V-kit Hardy-Zuckerman 4 feline sarcoma viral oncogene homolog                                        | <i>KIT</i>       | 3815        | 269806      | 0.884713 | 0.0002 | +                 |
| H18864        | Notch homolog 1, translocation-associated (Drosophila)                                               | <i>NOTCH1</i>    | 4851        | 51275       | 0.884649 | 0.0002 | +                 |
| AI349935      | Myosin X                                                                                             | <i>MYO10</i>     | 4651        | 2052032     | 0.884431 | 0.0002 | +                 |
| AA775239      | Transmembrane 4 superfamily member tetraspan NET 5                                                   | <i>NET 5</i>     | 10867       | 878572      | 0.879527 | 0.0002 | +                 |
| AA680132      | Sphingomyelin phosphodiesterase 2, neutral membrane (neutral sphingomyelinase)                       | <i>SMPD2</i>     | 6610        | 433170      | 0.879171 | 0.0002 | -                 |
| BX090399      | Chromobox homolog 5 (HP1 alpha homolog, Drosophila)                                                  | <i>CBX5</i>      | 23468       | 452483      | 0.85016  | 0.0002 | +                 |
| H17037        | Similar to CG4502-PA                                                                                 | <i>0</i>         | 134111      | 50582       | 0.843724 | 0.0002 | +                 |
| AA872348      | Ras homolog gene family, member F (in filopodia)                                                     | <i>RHOF</i>      | 54509       | 1472664     | 0.839777 | 0.0002 | +                 |
| AA287218      | Glycoprotein M6B                                                                                     | <i>GPM6B</i>     | 2824        | 713660      | 0.839248 | 0.0002 | -                 |
| AA608572      | Pyrophosphatase (inorganic)                                                                          | <i>PP</i>        | 5464        | 950700      | 0.836194 | 0.0002 | -                 |
| AA705374      | Organic solute transporter alpha                                                                     | <i>OSTalpha</i>  | 200931      | 462116      | 0.835377 | 0.0002 | +                 |
| AA043117      | Chromosome 9 open reading frame 9                                                                    | <i>C9orf9</i>    | 11092       | 486717      | 0.835163 | 0.0002 | -                 |
| AA700604      | Similar to Sorbitol dehydrogenase (L-iditol 2-dehydrogenase)                                         | <i>0</i>         | 116166      | 433350      | 0.830564 | 0.0002 | -                 |
| H08899        | Isopentenyl-diphosphate delta isomerase                                                              | <i>IDII</i>      | 3422        | 44975       | 0.829119 | 0.0002 | +                 |
| T53169        | KIAA2002 protein                                                                                     | <i>KIAA2002</i>  | 79834       | 68534       | 0.826286 | 0.0002 | +                 |
| AI936324      | Tyrosine kinase, non-receptor, 1                                                                     | <i>TNK1</i>      | 8711        | 2460159     | 0.823377 | 0.0002 | +                 |
| AI985214      | Tissue factor pathway inhibitor (lipoprotein-associated coagulation inhibitor)                       | <i>TFPI</i>      | 7035        | 2495781     | 0.819525 | 0.0002 | +                 |
| CR748825      | Tumor necrosis factor receptor superfamily, member 10c, decoy without an intracellular domain        | <i>TNFRSF10C</i> | 8794        | 2108257     | 0.816372 | 0.0002 | +                 |
| AI628353      | KIAA0882 protein                                                                                     | <i>KIAA0882</i>  | 23158       | 2284924     | 0.812537 | 0.0002 | +                 |
| AA703075      | Pyruvate dehydrogenase kinase, isoenzyme 1                                                           | <i>PDK1</i>      | 5163        | 436761      | 0.811307 | 0.0002 | +                 |
| AA486239      | Filamin B, beta (actin binding protein 278)                                                          | <i>FLNB</i>      | 2317        | 840818      | 0.810435 | 0.0002 | -                 |

|          |                                                                                   |                                 |               |         |          |        |   |
|----------|-----------------------------------------------------------------------------------|---------------------------------|---------------|---------|----------|--------|---|
| AA454079 | Sestrin 2                                                                         | <i>SESN2</i>                    | 83667         | 788232  | 0.810263 | 0.0002 | + |
| AA456101 | Phosphoinositide-3-kinase, class 3                                                | <i>PIK3C3</i>                   | 5289          | 813536  | 0.808075 | 0.0002 | + |
| AA968896 | Midkine (neurite growth-promoting factor 2)                                       | <i>MDK</i>                      | 4192          | 1574594 | 0.801315 | 0.0002 | + |
| AI871665 | Acetyl-Coenzyme A acetyltransferase 1 (acetoacetyl Coenzyme A thiolase)           | <i>ACAT1</i>                    | 38            | 2292807 | 0.798253 | 0.0002 | - |
| AA024866 | Hypothetical protein FLJ32731                                                     | <i>FLJ32731</i>                 | 138050        | 365177  | 0.796694 | 0.0002 | + |
| AA626264 | FCH and double SH3 domains 2                                                      | <i>FCHSD2</i>                   | 9873          | 745559  | 0.793226 | 0.0002 | + |
| R02010   | Chromosome 10 open reading frame 26                                               | <i>C10orf26</i>                 | 54838         | 124242  | 0.792052 | 0.0002 | + |
| AA917731 | RAB3A interacting protein (rabin3)                                                | <i>RAB3IP</i>                   | 117177        | 1527297 | 0.788901 | 0.0002 | + |
| AA487359 | Dishevelled associated activator of morphogenesis 1                               | <i>DAAMI</i>                    | 23002         | 841475  | 0.782561 | 0.0002 | - |
| AA133167 | KIAA1644 protein                                                                  | <i>KIAA1644</i>                 | 85352         | 490755  | 0.77832  | 0.0002 | + |
| AA045057 | Syndecan 2 (heparan sulfate proteoglycan 1, cell surface-associated, fibroglycan) | <i>SDC2</i>                     | 6383          | 488873  | 0.778315 | 0.0002 | + |
| AA708152 | Transmembrane emp24 protein transport domain containing 6                         | <i>MGC23911</i>                 | 146456        | 460798  | 0.775422 | 0.0002 | + |
| N49669   | Hypothetical protein FLJ40629                                                     | <i>FLJ40629</i>                 | 150468        | 243887  | 0.772276 | 0.0002 | - |
| BX100923 | Cadherin 4, type 1, R-cadherin (retinal)                                          | <i>CDH4</i>                     | 1002          | 32777   | 0.771108 | 0.0002 | + |
| N23340   | Hypothetical protein LOC152485                                                    | <i>LOC152485</i>                | 152485        | 267186  | 0.769093 | 0.0002 | + |
| BX114269 | Chromodomain helicase DNA binding protein 2                                       | <i>CHD2</i>                     | 1106          | 137211  | 0.767528 | 0.0002 | + |
| AW074953 | Chromosome 21 open reading frame 2                                                | <i>C21orf2</i>                  | 755           | 2572207 | 0.759987 | 0.0002 | - |
| T81140   | Coatmer protein complex, subunit alpha                                            | <i>COPA</i>                     | 1314          | 109153  | 0.758981 | 0.0002 | - |
| AI308916 | Protease, serine, 3 (mesotrypsin)                                                 | <i>PRSS3</i>                    | 5646          | 1913366 | 0.758964 | 0.0002 | + |
| AA394198 | Protease, serine, 2 (trypsin 2)                                                   | <i>PRSS2</i>                    | 5645          | 725709  | 0.757919 | 0.0002 | + |
| AA125911 | PDZ and LIM domain 7 (enigma)                                                     | <i>PDLIM7</i>                   | 9260          | 502682  | 0.757087 | 0.0002 | + |
| W32777   | Transducin-like enhancer of split 3 (E(sp1) homolog, Drosophila)                  | <i>TLE3</i>                     | 7090          | 321574  | 0.756531 | 0.0002 | + |
| AA025276 | Catenin (cadherin-associated protein), delta 1                                    | <i>CTNND1</i>                   | 1500          | 364921  | 0.753847 | 0.0002 | - |
| T97800   | Hypothetical protein LOC284940                                                    | <i>SHANK3</i>                   | 85358         | 121540  | 0.753758 | 0.0002 | + |
| AI356028 | G protein-coupled receptor, family C, group 5, member B                           | <i>GPRC5B</i>                   | 51704         | 2016775 | 0.751625 | 0.0002 | + |
| AA255695 | Solute carrier family 12 (sodium/potassium/chloride transporters), member 2       | <i>SLC12A2</i>                  | 6558          | 685801  | 0.750119 | 0.0002 | + |
| AW084720 | Complement component 1, s subcomponent                                            | <i>C1S</i>                      | 716           | 2569884 | 0.748095 | 0.0002 | + |
| AA453774 | Regulator of G-protein signalling 16                                              | <i>RGS16</i>                    | 6004          | 813707  | 0.745766 | 0.0002 | - |
| BX103609 | Multiple cluster hits:77091 & 196169                                              | <i>DNASE1L1 &amp; LOC285944</i> | 1774 & 285944 | 2108031 | 0.74419  | 0.0002 | + |
| AA504232 | High-mobility group 20A                                                           | <i>HMG20A</i>                   | 10363         | 825036  | 0.743126 | 0.0002 | + |
| H09449   | Spondin 1, extracellular matrix protein                                           | <i>SPON1</i>                    | 10418         | 46173   | 0.74308  | 0.0002 | + |
| BX100743 | Multiple cluster hits:198161 & 549160                                             | <i>PLA2G4B &amp; SPTBN5</i>     | 8681 & 51332  | 343699  | 0.742341 | 0.0002 | - |
| AA705153 | Hypothetical protein FLJ10357                                                     | <i>FLJ10357</i>                 | 55701         | 461613  | 0.740163 | 0.0002 | + |
| AA935533 | E2F transcription factor 6                                                        | <i>E2F6</i>                     | 1876          | 1557277 | 0.738094 | 0.0002 | + |
| AA410288 | Rho guanine nucleotide exchange factor (GEF) 12                                   | <i>ARHGEF12</i>                 | 23365         | 754450  | 0.73536  | 0.0002 | + |
| AA412053 | CD9 antigen (p24)                                                                 | <i>CD9</i>                      | 928           | 727251  | 0.735204 | 0.0002 | - |
| T95423   | Multiple cluster hits:507452 & 515130                                             | <i>XPO4 &amp; VANGL1</i>        | 64328 & 81839 | 120749  | 0.735202 | 0.0002 | - |
| N62366   | Hypothetical protein LOC339344                                                    | <i>LOC339344</i>                | 339344        | 290536  | 0.735143 | 0.0002 | - |
| AI668897 | Protein tyrosine phosphatase, non-receptor type 18 (brain-derived)                | <i>PTPN18</i>                   | 26469         | 2313483 | 0.73478  | 0.0002 | + |
| AA670419 | Chromosome 22 open reading frame 9                                                | <i>C22orf9</i>                  | 23313         | 878809  | 0.733898 | 0.0002 | - |
| R08679   | Abhydrolase domain containing 6                                                   | <i>ABHD6</i>                    | 57406         | 127447  | 0.733888 | 0.0002 | + |
| R12473   | Adenosine kinase                                                                  | <i>ADK</i>                      | 132           | 128243  | 0.7309   | 0.0002 | - |
| AA453028 | Paired immunoglobulin-like type 2 receptor beta                                   | <i>PILRB</i>                    | 29990         | 788355  | 0.729354 | 0.0002 | + |
| AI808234 | Zinc finger protein 177                                                           | <i>ZNF177</i>                   | 7730          | 2363207 | 0.728796 | 0.0002 | - |
| BX111856 | Phytanoyl-CoA hydroxylase (Refsum disease)                                        | <i>PHYH</i>                     | 5264          | 293104  | 0.724776 | 0.0002 | + |
| AA863116 | Hypothetical LOC403340                                                            | <i>MGC70870</i>                 | 403340        | 1455602 | 0.723544 | 0.0002 | - |
| AI492471 | Abhydrolase domain containing 3                                                   | <i>ABHD3</i>                    | 171586        | 2131779 | 0.721328 | 0.0002 | + |
| BX113672 | Similar to BMP2 inducible kinase                                                  | <i>0</i>                        | 388957        | 243524  | 0.721095 | 0.0002 | - |
| AI652765 | Zinc finger, FYVE domain containing 9                                             | <i>ZFYVE9</i>                   | 9372          | 2310274 | 0.719562 | 0.0002 | - |

|          |                                              |               |       |         |          |        |   |
|----------|----------------------------------------------|---------------|-------|---------|----------|--------|---|
| AW057930 | Unc-13 homolog B (C. elegans)                | <i>UNC13B</i> | 10497 | 2541460 | 0.716477 | 0.0002 | + |
| AA443899 | Scavenger receptor class B, member 1         | <i>SCARB1</i> | 949   | 756687  | 0.71539  | 0.0002 | + |
| AA035450 | Inositol 1,4,5-triphosphate receptor, type 1 | <i>ITPR1</i>  | 3708  | 471725  | 0.715186 | 0.0002 | + |
| N66008   | Tumor suppressor candidate 3                 | <i>TUSC3</i>  | 7991  | 293859  | 0.713174 | 0.0002 | + |
| N25897   | BCL2-associated athanogene 4                 | <i>BAG4</i>   | 9530  | 258454  | 0.708888 | 0.0002 | + |

\*Value from discriminatory analysis, with a high value indicating a high correlation with the classes.

†The plus (+) sign indicates relative up-regulation in *ETV6/RUNX1*-positive ALLs, the minus (-) sign indicates up-regulation in the remaining B lineage ALLs.
