# Supplementary material
Source: PubMed Central journal article supplement (PMC1323166)
Supplement: pnas_0506637102_17.pdf [file pnas_0506637102_17.pdf]

**Table 18. The top-100 differentially expressed genes in hyperdiploid vs. B lineage ALL**

| Accession no. | Gene name                                                                                       | Gene symbol                | Entrez Gene   | Reporter ID | Score*   | P      | Sign <sup>†</sup> |
|---------------|-------------------------------------------------------------------------------------------------|----------------------------|---------------|-------------|----------|--------|-------------------|
| AA099522      | Zinc finger, CW type with coiled-coil domain 2                                                  | <i>ZCWCC2</i>              | 79710         | 489594      | 0.920107 | 0.0002 | +                 |
| AA464528      | Proteolipid protein 2 (colonic epithelium-enriched)                                             | <i>PLP2</i>                | 5355          | 810504      | 0.916328 | 0.0002 | +                 |
| AA504303      | Multiple cluster hits:435933 & 495960                                                           | <i>PHF10 &amp; ATP6AP2</i> | 55274 & 10159 | 825076      | 0.882042 | 0.0002 | +                 |
| AA496795      | Intersectin 1 (SH3 domain protein)                                                              | <i>ITSN1</i>               | 6453          | 897652      | 0.871029 | 0.0002 | +                 |
| AI983274      | ATPase, H <sup>+</sup> transporting, lysosomal accessory protein 2                              | <i>ATP6AP2</i>             | 10159         | 2517344     | 0.861921 | 0.0002 | +                 |
| BX099233      | Down syndrome critical region gene 5                                                            | <i>DSCR5</i>               | 51227         | 785642      | 0.855825 | 0.0002 | +                 |
| R67222        | Chromosome 6 open reading frame 192                                                             | <i>C6orf192</i>            | 116843        | 140852      | 0.854382 | 0.0002 | +                 |
| AA151486      | Phosphoribosyl pyrophosphate synthetase 2                                                       | <i>PRPS2</i>               | 5634          | 503097      | 0.853556 | 0.0002 | +                 |
| AA989257      | SH3-domain kinase binding protein 1                                                             | <i>SH3KBP1</i>             | 30011         | 1604005     | 0.826585 | 0.0002 | +                 |
| AA188661      | SH3-domain binding protein 5 (BTK-associated)                                                   | <i>SH3BP5</i>              | 9467          | 626343      | 0.824351 | 0.0002 | +                 |
| AA488237      | Hypothetical protein MGC23937 similar to CG4798                                                 | <i>MGC23937</i>            | 139596        | 877637      | 0.820576 | 0.0002 | +                 |
| AA669443      | Eukaryotic translation initiation factor 5                                                      | <i>EIF5</i>                | 1983          | 884867      | 0.810772 | 0.0002 | +                 |
| AA251026      | Transmembrane protein 32                                                                        | <i>TMEM32</i>              | 93380         | 684539      | 0.804051 | 0.0002 | +                 |
| BX099263      | Prominin 1                                                                                      | <i>PROM1</i>               | 8842          | 27544       | 0.800393 | 0.0002 | +                 |
| R59936        | Potassium inwardly-rectifying channel, subfamily J, member 6                                    | <i>KCNJ6</i>               | 3763          | 43101       | 0.798717 | 0.0002 | +                 |
| AI537061      | Sex comb on midleg-like 1 (Drosophila)                                                          | <i>SCML1</i>               | 6322          | 2184814     | 0.795694 | 0.0002 | +                 |
| R89905        | Ubiquitin specific protease 9, X-linked (fat facets-like, Drosophila)                           | <i>USP9X</i>               | 8239          | 194706      | 0.794274 | 0.0002 | +                 |
| N48017        | CDNA clone IMAGE:4686928, partial cds                                                           | <i>0</i>                   | 0             | 272049      | 0.793969 | 0.0002 | +                 |
| N49204        | Acylphosphatase 2, muscle type                                                                  | <i>ACYP2</i>               | 98            | 280252      | 0.792266 | 0.0002 | -                 |
| H23561        | Deltex homolog 1 (Drosophila)                                                                   | <i>DTX1</i>                | 1840          | 52120       | 0.786572 | 0.0002 | -                 |
| AA167328      | Implantation-associated protein                                                                 | <i>DKFZp564K142</i>        | 84061         | 595620      | 0.785457 | 0.0002 | +                 |
| BX108537      | Multiple cluster hits:2815 & 369761                                                             | <i>POU6F1 &amp; DAZAP2</i> | 5463 & 9802   | 289447      | 0.783708 | 0.0002 | +                 |
| AA482326      | Leucine zipper, down-regulated in cancer 1-like                                                 | <i>LDOC1L</i>              | 84247         | 840884      | 0.776053 | 0.0002 | -                 |
| AA670134      | Tetrapeptide repeat domain 3                                                                    | <i>TTC3</i>                | 7267          | 844725      | 0.772243 | 0.0002 | +                 |
| AA446730      | Upstream regulatory element binding protein 1                                                   | <i>UREB1</i>               | 10075         | 783681      | 0.771771 | 0.0002 | +                 |
| N22323        | Mst3 and SOK1-related kinase                                                                    | <i>MST4</i>                | 51765         | 254029      | 0.77065  | 0.0002 | +                 |
| AA621510      | Zinc finger protein 219                                                                         | <i>ZNF219</i>              | 51222         | 1055297     | 0.770246 | 0.0002 | -                 |
| AI948893      | SH3-domain binding protein 2                                                                    | <i>SH3BP2</i>              | 6452          | 2471503     | 0.763598 | 0.0002 | +                 |
| AI523637      | Protocadherin 9                                                                                 | <i>PCDH9</i>               | 5101          | 2116531     | 0.7611   | 0.0002 | -                 |
| W40257        | UDP-N-acetyl-alpha-D-galactosamine:polypeptide N-acetyl-galactosaminyltransferase 3 (GalNAc-T3) | <i>GALNT3</i>              | 2591          | 328542      | 0.758871 | 0.0002 | +                 |
| BX116655      | Follicular lymphoma variant translocation 1                                                     | <i>FVT1</i>                | 2531          | 233765      | 0.754143 | 0.0002 | +                 |
| AA278240      | Haloacid dehalogenase-like hydrolase domain containing 1A                                       | <i>HDHD1A</i>              | 8226          | 703479      | 0.750802 | 0.0002 | +                 |
| BX104021      | Synuclein, alpha (non A4 component of amyloid precursor)                                        | <i>SNCA</i>                | 6622          | 418328      | 0.747027 | 0.0002 | +                 |
| AA906438      | Hypothetical protein BC007772                                                                   | <i>LOC93109</i>            | 93109         | 1505998     | 0.744796 | 0.0002 | -                 |
| AA491107      | Multiple cluster hits:449098 & 549611                                                           | <i>KIAA0685 &amp; 0</i>    | 9701 & 0      | 824557      | 0.741599 | 0.0002 | +                 |
| AW008840      | Nephroblastoma overexpressed gene                                                               | <i>NOV</i>                 | 4856          | 2502789     | 0.738042 | 0.0002 | +                 |
| AA630138      | Zinc finger protein 185 (LIM domain)                                                            | <i>ZNF185</i>              | 7739          | 855079      | 0.737008 | 0.0002 | +                 |
| R48131        | Multiple cluster hits:167679 & 537269                                                           | <i>SH3BP2 &amp; 0</i>      | 6452 & 0      | 153694      | 0.735089 | 0.0002 | +                 |
| BX105795      | Ephrin-B1                                                                                       | <i>EFNB1</i>               | 1947          | 756968      | 0.734999 | 0.0002 | +                 |
| AA425612      | Solute carrier family 16 (monocarboxylic acid transporters), member 2                           | <i>SLC16A2</i>             | 6567          | 773344      | 0.733934 | 0.0002 | +                 |
| AI401528      | Hypothetical protein MGC34646                                                                   | <i>MGC34646</i>            | 157807        | 2110073     | 0.732217 | 0.0002 | +                 |
| N47922        | FLJ10378 protein                                                                                | <i>FLJ10378</i>            | 55132         | 260181      | 0.729115 | 0.0002 | +                 |
| AI682474      | Nuclear transport factor 2-like export factor 2                                                 | <i>NXT2</i>                | 55916         | 2322396     | 0.727954 | 0.0002 | +                 |
| CR742982      | Multiple cluster hits:257761 & 410969                                                           | <i>SH3BP5 &amp; NTRK3</i>  | 9467 & 4916   | 35356       | 0.723647 | 0.0002 | +                 |
| AI299482      | Hairy/enhancer-of-split related with YRPW motif 2                                               | <i>HEY2</i>                | 23493         | 1895748     | 0.720416 | 0.0002 | -                 |

|          |                                                                       |                             |                |         |          |        |   |
|----------|-----------------------------------------------------------------------|-----------------------------|----------------|---------|----------|--------|---|
| W01926   | Membrane-spanning 4-domains, subfamily A, member 6A                   | <i>MS4A6A</i>               | 64231          | 294535  | 0.71719  | 0.0002 | + |
| AA663941 | LOC387882 hypothetical protein                                        | <i>LOC387882</i>            | 387882         | 855707  | 0.716953 | 0.0002 | + |
| AA629796 | Sorting nexin 12                                                      | <i>SNX12</i>                | 29934          | 884540  | 0.715941 | 0.0002 | + |
| H02929   | Ring finger protein 153                                               | <i>RNF153</i>               | 54708          | 151755  | 0.713692 | 0.0002 | + |
| AA706929 | Protein phosphatase 1F (PP2C domain containing)                       | <i>PPM1F</i>                | 9647           | 451855  | 0.712116 | 0.0002 | + |
| H09375   | Cellular repressor of E1A-stimulated genes 2                          | <i>CREG2</i>                | 200407         | 45999   | 0.710153 | 0.0002 | + |
| AA194201 | Bradykinin receptor B2                                                | <i>BDKRB2</i>               | 624            | 665674  | 0.699995 | 0.0002 | + |
| AA679345 | Heterogeneous nuclear ribonucleoprotein H2 (H')                       | <i>HNRPH2</i>               | 3188           | 866874  | 0.699454 | 0.0002 | + |
| AW004620 | Calcium/calmodulin-dependent protein kinase I                         | <i>CAMK1</i>                | 8536           | 2505310 | 0.697136 | 0.0002 | + |
| N73975   | Transcription elongation factor A (SII)-like 4                        | <i>TCEAL4</i>               | 79921          | 296616  | 0.69489  | 0.0002 | + |
| W55967   | MAP3K12 binding inhibitory protein 1                                  | <i>MBIP</i>                 | 51562          | 340555  | 0.693368 | 0.0002 | + |
| H09456   | Target of myb1-like 2 (chicken)                                       | <i>TOMIL2</i>               | 146691         | 46278   | 0.693016 | 0.0002 | + |
| H61901   | Ribosomal protein S6 kinase, 90kDa, polypeptide 3                     | <i>RPS6KA3</i>              | 6197           | 204148  | 0.692303 | 0.0002 | + |
| H24099   | Cystatin B (stefin B)                                                 | <i>CSTB</i>                 | 1476           | 51814   | 0.691051 | 0.0002 | + |
| N48804   | Forkhead box P1                                                       | <i>FOXP1</i>                | 27086          | 279482  | 0.689329 | 0.0002 | - |
| BX102980 | Moesin                                                                | <i>MSN</i>                  | 4478           | 814265  | 0.688239 | 0.0002 | + |
| R92281   | Cytochrome B 5                                                        | <i>CYB5</i>                 | 1528           | 196189  | 0.687899 | 0.0002 | + |
| BX103653 | Breast cancer membrane protein 101                                    | <i>NSE2</i>                 | 157638         | 278572  | 0.686955 | 0.0002 | + |
| AA429946 | Dehydrogenase/reductase (SDR family) member 4                         | <i>DHRS4</i>                | 10901          | 781295  | 0.679879 | 0.0002 | + |
| AA029842 | Mature T cell proliferation 1                                         | <i>MTCPI1</i>               | 4515           | 470175  | 0.67954  | 0.0002 | + |
| AA782314 | Hypothetical protein MGC35440                                         | <i>LOC147991</i>            | 147991         | 857574  | 0.679373 | 0.0002 | - |
| AA459420 | Hypothetical protein FLJ20699                                         | <i>FLJ20699</i>             | 55020          | 810981  | 0.677223 | 0.0002 | + |
| AA705153 | Hypothetical protein FLJ10357                                         | <i>FLJ10357</i>             | 55701          | 461613  | 0.676399 | 0.0002 | - |
| AA070661 | S100 calcium binding protein A13                                      | <i>S100A13</i>              | 6284           | 530035  | 0.676162 | 0.0002 | + |
| R35848   | Membrane-bound transcription factor protease, site 2                  | <i>MBTPS2</i>               | 51360          | 38450   | 0.676029 | 0.0002 | + |
| R43580   | Ubiquilin 2                                                           | <i>UBQLN2</i>               | 29978          | 23018   | 0.675635 | 0.0002 | + |
| AA056375 | Hypothetical protein from clone 643                                   | <i>LOC57228</i>             | 57228          | 509458  | 0.675332 | 0.0002 | + |
| AA464059 | Coagulation factor VIII-associated (intronic transcript) 1            | <i>F8A1</i>                 | 8263           | 810264  | 0.674808 | 0.0002 | + |
| AW051907 | KIAA0179                                                              | <i>KIAA0179</i>             | 23076          | 2557117 | 0.673702 | 0.0002 | + |
| AA169699 | Hypothetical protein FLJ11171                                         | <i>FLJ11171</i>             | 55783          | 609910  | 0.671402 | 0.0002 | + |
| AA491271 | Hypothetical protein FLJ12525                                         | <i>FLJ12525</i>             | 81887          | 824622  | 0.66928  | 0.0002 | + |
| H94063   | Chromosome 13 open reading frame 1                                    | <i>C13orf1</i>              | 57213          | 242840  | 0.667141 | 0.0002 | + |
| AA045399 | Hypothetical protein LOC162073                                        | <i>LOC162073</i>            | 162073         | 487831  | 0.666409 | 0.0002 | + |
| AA872379 | SMT3 suppressor of mif two 3 homolog 3 (yeast)                        | <i>SUMO3</i>                | 6612           | 1472719 | 0.666257 | 0.0002 | + |
| AA486239 | Filamin B, beta (actin binding protein 278)                           | <i>FLNB</i>                 | 2317           | 840818  | 0.666244 | 0.0002 | + |
| N71286   | Tripartite motif-containing 10                                        | <i>TRIM10</i>               | 10107          | 294655  | 0.664245 | 0.0002 | - |
| AA102454 | Calpain 2, (m/II) large subunit                                       | <i>CAPN2</i>                | 824            | 549728  | 0.659665 | 0.0002 | + |
| AA701368 | Carbonic anhydrase VB like                                            | <i>CA5BL</i>                | 340591         | 435510  | 0.658644 | 0.0002 | + |
| AA677340 | Phosphorylase kinase, alpha 2 (liver)                                 | <i>PHKA2</i>                | 5256           | 454475  | 0.658351 | 0.0002 | + |
| N52162   | Protein kinase (cAMP-dependent, catalytic) inhibitor alpha            | <i>PKIA</i>                 | 5569           | 284401  | 0.657349 | 0.0002 | - |
| R52176   | Multiple cluster hits:180257 & 407983                                 | <i>ZNF550 &amp; SFMBT2</i>  | 162972 & 57713 | 40296   | 0.656336 | 0.0002 | + |
| AA630381 | Chromosome 14 open reading frame 147                                  | <i>C14orf147</i>            | 171546         | 855345  | 0.654548 | 0.0002 | + |
| AA099515 | Signal sequence receptor, alpha (translocon-associated protein alpha) | <i>SSR1</i>                 | 6745           | 510679  | 0.652463 | 0.0002 | + |
| BX112916 | RAB40C, member RAS oncogene family                                    | <i>RAB40C</i>               | 57799          | 136303  | 0.651194 | 0.0002 | + |
| AA489238 | Multiple cluster hits:21388 & 460499                                  | <i>ZDHHC21 &amp; ATXN2L</i> | 340481 & 11273 | 825088  | 0.650119 | 0.0002 | - |
| N53133   | Spermatid perinuclear RNA binding protein                             | <i>STRBP</i>                | 55342          | 246620  | 0.647345 | 0.0002 | + |
| AA056693 | Phosphatidic acid phosphatase type 2B                                 | <i>PPAP2B</i>               | 8613           | 489201  | 0.647171 | 0.0002 | + |
| N78101   | Cyclin I                                                              | <i>CCNI</i>                 | 10983          | 248295  | 0.646068 | 0.0002 | + |
| AA004975 | Development and differentiation enhancing factor 1                    | <i>DDEF1</i>                | 50807          | 428936  | 0.64329  | 0.0002 | + |
| AA047623 | Progesterone receptor membrane component 2                            | <i>PGRMC2</i>               | 10424          | 376785  | 0.64271  | 0.0002 | + |

|          |                                              |               |       |         |          |        |   |
|----------|----------------------------------------------|---------------|-------|---------|----------|--------|---|
| AW005979 | Interleukin-1 receptor-associated kinase 1   | <i>IRAK1</i>  | 3654  | 2566158 | 0.642416 | 0.0002 | + |
| AA928142 | Porcupine homolog (Drosophila)               | <i>PORCN</i>  | 64840 | 1541827 | 0.641004 | 0.0002 | + |
| BX090714 | Pyruvate dehydrogenase kinase, isoenzyme 3   | <i>PKD3</i>   | 5165  | 278242  | 0.640593 | 0.0002 | + |
| R74171   | Rap2 interacting protein x                   | <i>RIPX</i>   | 22902 | 143310  | 0.639547 | 0.0002 | - |
| AI349234 | Family with sequence similarity 26, member B | <i>FAM26B</i> | 51063 | 2049813 | 0.637868 | 0.0002 | + |

\*Value from discriminatory analysis, with a high value indicating a high correlation with the classes.

†The plus (+) sign indicates relative up-regulation in hyperdiploid ALL, the minus (-) sign indicates up-regulation in B lineage ALLs.
