# Supplementary material
Source: PubMed Central journal article supplement (PMC1323166)
Supplement: pnas_0506637102_18.pdf [file pnas_0506637102_18.pdf]

**Table 19. The differentially expressed genes in NK vs. B lineage ALL**

| Accession no. r | Gene name                                                                                   | Gene symbol                  | Entrez gene  | Reporter ID | Score*   | P      | Sign <sup>†</sup> |
|-----------------|---------------------------------------------------------------------------------------------|------------------------------|--------------|-------------|----------|--------|-------------------|
| BX090123        | Chromatin assembly factor 1, subunit B (p60)                                                | <i>CHAF1B</i>                | 8208         | 756769      | 0.97783  | 0.0002 | -                 |
| R72365          | ORF                                                                                         | <i>LOC51035</i>              | 51035        | 155896      | 0.897056 | 0.0002 | +                 |
| AA126419        | Inositol polyphosphate-4-phosphatase, type I, 107kDa                                        | <i>INPP4A</i>                | 3631         | 490471      | 0.896319 | 0.0002 | +                 |
| AA455693        | COP9 constitutive photomorphogenic homolog subunit 3 (Arabidopsis)                          | <i>COPS3</i>                 | 8533         | 813983      | 0.88703  | 0.0002 | -                 |
| R23687          | Golgi autoantigen, golgin subfamily a, 1                                                    | <i>GOLGA1</i>                | 2800         | 34102       | 0.8847   | 0.0002 | +                 |
| AA485983        | MCM4 minichromosome maintenance deficient 4 ( <i>S. cerevisiae</i> )                        | <i>MCM4</i>                  | 4173         | 843049      | 0.882806 | 0.0004 | -                 |
| AA043501        | V-maf musculoaponeurotic fibrosarcoma oncogene homolog (avian)                              | <i>MAF</i>                   | 4094         | 487793      | 0.872188 | 0.0002 | +                 |
| AA455261        | Chromobox homolog 7                                                                         | <i>CBX7</i>                  | 23492        | 814815      | 0.861587 | 0.0002 | +                 |
| AA505067        | Multiple cluster hits:126655 & 155983                                                       | <i>LOC92017 &amp; JMJD2A</i> | 92017 & 9682 | 825649      | 0.857942 | 0.0004 | +                 |
| N63894          | LOC440461                                                                                   | <i>0</i>                     | 440461       | 293759      | 0.854021 | 0.0002 | +                 |
| AA005350        | Hypothetical protein MGC26694                                                               | <i>MGC26694</i>              | 284439       | 428377      | 0.847288 | 0.0006 | +                 |
| AA491015        | Integrin, alpha 4 (antigen CD49D, alpha 4 subunit of VLA-4 receptor)                        | <i>ITGA4</i>                 | 3676         | 823964      | 0.838276 | 0.0006 | +                 |
| N34436          | V-maf musculoaponeurotic fibrosarcoma oncogene homolog (avian)                              | <i>MAF</i>                   | 4094         | 277414      | 0.837416 | 0.0002 | +                 |
| AA481076        | MAD2 mitotic arrest deficienT like 1 (yeast)                                                | <i>MAD2L1</i>                | 4085         | 814701      | 0.836135 | 0.0004 | -                 |
| W05762          | Chromosome 14 open reading frame 147                                                        | <i>C14orf147</i>             | 171546       | 299664      | 0.831883 | 0.0004 | -                 |
| AI795996        | X-ray repair complementing defective repair in Chinese hamster cells 4                      | <i>XRCC4</i>                 | 7518         | 2383277     | 0.829554 | 0.0004 | +                 |
| R38306          | Nuclear factor of activated T cells, cytoplasmic, calcineurin-dependent 3                   | <i>NFATC3</i>                | 4775         | 137457      | 0.823186 | 0.0004 | +                 |
| CR742119        | Multiple cluster hits:144496 & 370292                                                       | <i>GMDS &amp; BCCIP</i>      | 2762 & 56647 | 112576      | 0.805223 | 0.0008 | -                 |
| AA703117        | 3' exoribonuclease                                                                          | <i>3'HEXO</i>                | 90459        | 434828      | 0.7985   | 0.0004 | -                 |
| AA293819        | Nuclear factor of activated T cells, cytoplasmic, calcineurin-dependent 3                   | <i>NFATC3</i>                | 4775         | 727192      | 0.790428 | 0.0004 | +                 |
| H85311          | Stress 70 protein chaperone, microsome-associated, 60kDa                                    | <i>STCH</i>                  | 6782         | 222025      | 0.783004 | 0.0004 | -                 |
| BX113198        | Microtubule associated serine/threonine kinase-like                                         | <i>MASTL</i>                 | 84930        | 1070324     | 0.78294  | 0.0008 | -                 |
| N47311          | Hypoxanthine phosphoribosyltransferase 1 (Lesch-Nyhan syndrome)                             | <i>HPRT1</i>                 | 3251         | 280507      | 0.780259 | 0.0004 | -                 |
| AA252014        | Galactosidase, alpha                                                                        | <i>GLA</i>                   | 2717         | 684879      | 0.77791  | 0.0008 | -                 |
| AI222059        | Follistatin-like 4                                                                          | <i>FSTL4</i>                 | 23105        | 1843488     | 0.768948 | 0.0002 | +                 |
| AA404486        | Solute carrier family 25 (mitochondrial carrier; adenine nucleotide translocator), member 5 | <i>SLC25A5</i>               | 292          | 772304      | 0.757738 | 0.0004 | -                 |
| AA521490        | Limkain b1                                                                                  | <i>LKAP</i>                  | 9665         | 826622      | 0.753162 | 0.001  | +                 |
| R21638          | Multiple cluster hits:460184 & 547153                                                       | <i>MCM4 &amp; 0</i>          | 4173 & 0     | 130204      | 0.744934 | 0.0006 | -                 |
| AA464291        | Ubiquitin specific protease 19                                                              | <i>USP19</i>                 | 10869        | 809848      | 0.742805 | 0.001  | +                 |
| R43956          | Pleckstrin homology, Sec7 and coiled-coil domains 4                                         | <i>PSCD4</i>                 | 27128        | 33293       | 0.741404 | 0.0006 | +                 |
| AA019203        | High-mobility group box 2                                                                   | <i>HMGB2</i>                 | 3148         | 363103      | 0.739436 | 0.0006 | -                 |
| AA454912        | Vacuolar protein sorting 52 (yeast)                                                         | <i>VPS52</i>                 | 6293         | 809961      | 0.738125 | 0.0008 | +                 |
| AA918089        | Ras homolog gene family, member T2                                                          | <i>RHOT2</i>                 | 89941        | 1536013     | 0.737092 | 0.0008 | +                 |
| AA426341        | Von Hippel-Lindau binding protein 1                                                         | <i>VBP1</i>                  | 7411         | 757404      | 0.736667 | 0.0008 | -                 |
| H59203          | CDC6 cell division cycle 6 homolog ( <i>S. cerevisiae</i> )                                 | <i>CDC6</i>                  | 990          | 204214      | 0.729547 | 0.001  | -                 |
| BX103899        | Hypothetical protein MGC29956                                                               | <i>MGC29956</i>              | 131616       | 754112      | 0.727237 | 0.0006 | +                 |
| BX100912        | Basophilic leukemia expressed protein BLES03                                                | <i>Bles03</i>                | 83638        | 151371      | 0.724993 | 0.001  | +                 |
| AA453497        | Rap guanine nucleotide exchange factor (GEF) 3                                              | <i>RAPGEF3</i>               | 10411        | 795382      | 0.722959 | 0.0006 | +                 |
| R19544          | Multiple cluster hits:143805 & 530075                                                       | <i>0 &amp; 0</i>             | 0 & 0        | 33510       | 0.719607 | 0.0006 | +                 |
| AA935719        | Hypothetical protein LOC283357                                                              | <i>LOC283357</i>             | 283357       | 1557318     | 0.705155 | 0.0004 | +                 |

\*Value from discriminatory analysis, with a high value indicating a high correlation with the classes.

<sup>†</sup>The plus (+) sign indicates relative up-regulation in B lineage ALL, the minus (-) sign indicates up-regulation in normal cells.
