# Supplementary material
Source: PubMed Central journal article supplement (PMC1323166)
Supplement: pnas_0506637102_19.pdf [file pnas_0506637102_19.pdf]

**Table 20. The differentially expressed genes in P190 BCR/ABL1 vs. B lineage ALL**

| Accession no. | Gene name                                                                                                 | Gene symbol                | Entrez gene | Reporter ID | Score*   | P      | Sign <sup>†</sup> |
|---------------|-----------------------------------------------------------------------------------------------------------|----------------------------|-------------|-------------|----------|--------|-------------------|
| AI493714      | KIAA1914                                                                                                  | <i>KIAA1914</i>            | 84632       | 2019957     | 3.965087 | 0.0002 | +                 |
| R53235        | Transcribed locus                                                                                         | <i>0</i>                   | 0           | 40435       | 3.960974 | 0.0002 | +                 |
| AA775576      | EMI domain containing 1                                                                                   | <i>EMID1</i>               | 129080      | 378420      | 2.932962 | 0.0006 | +                 |
| AI972443      | Purinergic receptor P2X, ligand-gated ion channel, 1                                                      | <i>P2RX1</i>               | 5023        | 2490112     | 2.822316 | 0.0002 | +                 |
| AA010797      | Hypothetical protein FLJ23191                                                                             | <i>FLJ23191</i>            | 79625       | 359795      | 2.68135  | 0.001  | -                 |
| H28986        | Brain and acute leukemia, cytoplasmic                                                                     | <i>BAALC</i>               | 79870       | 49923       | 2.589992 | 0.0002 | +                 |
| H88485        | High-mobility group nucleosomal binding domain 3                                                          | <i>HMGN3</i>               | 9324        | 252904      | 2.576282 | 0.0006 | +                 |
| BX114766      | Osteoclast stimulating factor 1                                                                           | <i>OSTF1</i>               | 26578       | 282663      | 2.536273 | 0.0008 | +                 |
| AA454146      | Cyclin H                                                                                                  | <i>CCNH</i>                | 902         | 795296      | 2.46435  | 0.0006 | -                 |
| AA040613      | CAP, adenylate cyclase-associated protein, 2 (yeast)                                                      | <i>CAP2</i>                | 10486       | 487297      | 2.31227  | 0.0006 | -                 |
| AI936324      | Tyrosine kinase, non-receptor, 1                                                                          | <i>TNK1</i>                | 8711        | 2460159     | 2.08865  | 0.0002 | -                 |
| BX091586      | THAP domain containing 10                                                                                 | <i>THAP10</i>              | 56906       | 190305      | 2.08714  | 0.0006 | -                 |
| CR742982      | Multiple cluster hits:257761 & 410969                                                                     | <i>:SH3BP5 &amp; NTRK3</i> | 9467 & 4916 | 35356       | 2.06129  | 0.0002 | +                 |
| AA486131      | Chemokine (C-C motif) ligand 5                                                                            | <i>CCL5</i>                | 6352        | 840753      | 2.0535   | 0.0004 | +                 |
| N27574        | Growth arrest specific 2 like 3                                                                           | <i>GAS2L3</i>              | 283431      | 264502      | 2.03601  | 0.0006 | -                 |
| AA490263      | NIMA (never in mitosis gene a)-related kinase 3                                                           | <i>NEK3</i>                | 4752        | 823794      | 2.009321 | 0.0004 | +                 |
| T68405        | Frizzled homolog 6 (Drosophila)                                                                           | <i>FZD6</i>                | 8323        | 83297       | 1.999678 | 0.0006 | +                 |
| BX111634      | Rho guanine nucleotide exchange factor (GEF) 3                                                            | <i>ARHGEF3</i>             | 50650       | 293745      | 1.992137 | 0.001  | +                 |
| AA954482      | Synovial sarcoma, X breakpoint 1                                                                          | <i>SSX1</i>                | 6756        | 1563050     | 1.88608  | 0.0006 | -                 |
| AA188661      | SH3-domain binding protein 5 (BTK-associated)                                                             | <i>SH3BP5</i>              | 9467        | 626343      | 1.722437 | 0.001  | +                 |
| AA464036      | PHD finger protein 8                                                                                      | <i>PHF8</i>                | 23133       | 810621      | 1.63057  | 0.001  | -                 |
| AI261303      | Mitochondrial ribosomal protein S22                                                                       | <i>MRPS22</i>              | 56945       | 2028599     | 1.630377 | 0.0008 | +                 |
| AA903339      | Ret proto-oncogene (multiple endocrine neoplasia and medullary thyroid carcinoma 1, Hirschsprung disease) | <i>RET</i>                 | 5979        | 1516955     | 1.39194  | 0.001  | -                 |
| AA953006      | SERTA domain containing 4                                                                                 | <i>SERTAD4</i>             | 56256       | 1561776     | 1.27716  | 0.0004 | -                 |

\*Value from discriminatory analysis, with a high value indicating a high correlation with the classes.

<sup>†</sup>The plus (+) sign indicates relative up-regulation in P190 BCR/ABL1, the minus (-) sign indicates up-regulation in B lineage.
