# Supplementary material
Source: PubMed Central journal article supplement (PMC1323166)
Supplement: pnas_0506637102_20.pdf [file pnas_0506637102_20.pdf]

**Table 21. The differentially expressed genes in *MLL* vs. B lineage ALL**

| Accession no. | Gene name                                                                                                        | Gene symbol         | Entrez gene | Reporter ID | Score*   | P      | Sign <sup>†</sup> |
|---------------|------------------------------------------------------------------------------------------------------------------|---------------------|-------------|-------------|----------|--------|-------------------|
| BX112951      | Meis1, myeloid ecotropic viral integration site 1 homolog (mouse)                                                | <i>MEIS1</i>        | 4211        | 307506      | 13.01914 | 0.0002 | +                 |
| AA953229      | Homeo box A10                                                                                                    | <i>HOXA10</i>       | 3206        | 1592006     | 7.32839  | 0.0002 | +                 |
| AA479883      | Hypothetical protein FLJ21127                                                                                    | <i>FLJ21127</i>     | 79600       | 772880      | 4.298862 | 0.0002 | +                 |
| N67262        | Zinc finger protein 135 (clone pHZ-17)                                                                           | <i>ZNF135</i>       | 7694        | 286378      | 4.223683 | 0.0002 | -                 |
| AA047441      | Protein phosphatase 1H (PP2C domain containing)                                                                  | <i>PPM1H</i>        | 57460       | 488431      | 4.195039 | 0.0002 | +                 |
| BX115990      | Chromosome 9 open reading frame 52                                                                               | <i>C9orf52</i>      | 158219      | 2110547     | 4.098576 | 0.0002 | +                 |
| BX105581      | Lymphocyte antigen 86                                                                                            | <i>LY86</i>         | 9450        | 2333826     | 3.400301 | 0.0002 | +                 |
| AI984983      | Phospholipase A2, group IVA (cytosolic, calcium-dependent)                                                       | <i>PLA2G4A</i>      | 5321        | 2494805     | 3.295743 | 0.0002 | +                 |
| AI021905      | Adducin 1 (alpha)                                                                                                | <i>ADD1</i>         | 118         | 1654651     | 3.293293 | 0.0002 | +                 |
| R22219        | Phosphate cytidyltransferase 2, ethanolamine                                                                     | <i>PCYT2</i>        | 5833        | 130884      | 3.291428 | 0.0004 | +                 |
| AA975680      | SVAP1 protein                                                                                                    | <i>IMAGE3451454</i> | 116841      | 1588973     | 3.287576 | 0.0004 | +                 |
| AA194765      | Forkhead box O1A (rhabdomyosarcoma)                                                                              | <i>FOXO1A</i>       | 2308        | 628955      | 3.284992 | 0.0002 | -                 |
| R06246        | Multiple cluster hits:30258 & 486548                                                                             | <i>0 &amp; MAP7</i> | 0 & 9053    | 126218      | 3.252799 | 0.0002 | +                 |
| AA147540      | Serine (or cysteine) proteinase inhibitor, clade B (ovalbumin), member 9                                         | <i>SERPINB9</i>     | 5272        | 505385      | 3.214267 | 0.0002 | -                 |
| AA486067      | Transducin (beta)-like 1X-linked                                                                                 | <i>TBLIX</i>        | 6907        | 840766      | 3.205819 | 0.0002 | -                 |
| AA453898      | Sialyltransferase 4C (beta-galactoside alpha-2,3-sialyltransferase)                                              | <i>SIAT4C</i>       | 6484        | 813751      | 3.137125 | 0.0002 | +                 |
| AA128156      | RunT related transcription factor 2                                                                              | <i>RUNX2</i>        | 860         | 501989      | 3.097915 | 0.0006 | +                 |
| AI927284      | Lectin, galactoside-binding, soluble, 1 (galectin 1)                                                             | <i>LGALS1</i>       | 3956        | 2461050     | 3.039644 | 0.0002 | +                 |
| AA453774      | Regulator of G-protein signalling 16                                                                             | <i>RGS16</i>        | 6004        | 813707      | 2.999767 | 0.0002 | +                 |
| AA431426      | Ribosomal protein L23a pseudogene 7                                                                              | <i>RPL23AP7</i>     | 118433      | 782434      | 2.975902 | 0.0002 | +                 |
| W45031        | Mitochondria-associated protein involved in granulocyte-macrophage colony-stimulating factor signal transduction | <i>Magmas</i>       | 51025       | 322923      | 2.9567   | 0.0008 | +                 |
| R12636        | Hypothetical gene LOC401431                                                                                      | <i>LOC401431</i>    | 401431      | 26149       | 2.89011  | 0.0002 | -                 |
| AA928660      | Protease, serine, 12 (neurotrypsin, motopsin)                                                                    | <i>PRSS12</i>       | 8492        | 1553054     | 2.838338 | 0.0004 | +                 |
| AA449654      | Formin binding protein 1                                                                                         | <i>FNBP1</i>        | 23048       | 785907      | 2.821136 | 0.0002 | +                 |
| AI278206      | RAB1A, member RAS oncogene family                                                                                | <i>RAB1A</i>        | 5861        | 1878917     | 2.814022 | 0.0002 | -                 |
| AA683557      | Ral guanine nucleotide dissociation stimulator-like 1                                                            | <i>RGL1</i>         | 23179       | 505864      | 2.80546  | 0.0004 | -                 |
| AA953973      | Spastic paraplegia 20, spartin (Troyer syndrome)                                                                 | <i>SPG20</i>        | 23111       | 1573305     | 2.796572 | 0.001  | +                 |
| N98832        | Spleen focus forming virus (SFFV) proviral integration oncogene sp1                                              | <i>SPI1</i>         | 6688        | 278808      | 2.786428 | 0.0002 | -                 |
| AA633658      | Amyloid beta (A4) precursor protein (protease nexin-II, Alzheimer disease)                                       | <i>APP</i>          | 351         | 856575      | 2.769163 | 0.0002 | -                 |
| N71061        | Chromosome 10 open reading frame 58                                                                              | <i>C10orf58</i>     | 84293       | 294591      | 2.736423 | 0.0002 | -                 |
| W52082        | Mitochondrial ribosomal protein L33                                                                              | <i>MRPL33</i>       | 9553        | 325520      | 2.698654 | 0.0002 | +                 |
| AA459614      | Tyrosylprotein sulfotransferase 2                                                                                | <i>TPST2</i>        | 8459        | 810937      | 2.686035 | 0.0002 | -                 |
| R77251        | Microtubule-associated protein 7                                                                                 | <i>MAP7</i>         | 9053        | 144834      | 2.676695 | 0.0002 | +                 |
| BX095299      | Fragile histidine triad gene                                                                                     | <i>FHIT</i>         | 2272        | 125273      | 2.662129 | 0.0002 | -                 |
| AA857015      | Ephrin-A1                                                                                                        | <i>EFNA1</i>        | 1942        | 1474684     | 2.646903 | 0.0002 | -                 |
| AA782337      | Ankyrin 2, neuronal                                                                                              | <i>ANK2</i>         | 287         | 857603      | 2.628807 | 0.0002 | +                 |
| AA482594      | Kelch-like 5 (Drosophila)                                                                                        | <i>KLHL5</i>        | 51088       | 746080      | 2.587484 | 0.0004 | -                 |
| AA400292      | Disabled homolog 2, mitogen-responsive phosphoprotein (Drosophila)                                               | <i>DAB2</i>         | 1601        | 742685      | 2.58302  | 0.0002 | -                 |
| AA669136      | Transcription factor 4                                                                                           | <i>TCF4</i>         | 6925        | 854581      | 2.575075 | 0.0002 | -                 |
| N36927        | CDNA FLJ33419 fis, clone BRACE2019877                                                                            | <i>0</i>            | 0           | 273536      | 2.527296 | 0.0004 | +                 |
| N46717        | Syntaxin binding protein 6 (amisyn)                                                                              | <i>STXBP6</i>       | 29091       | 277042      | 2.516744 | 0.0002 | +                 |
| AA428394      | HtrA serine peptidase 3                                                                                          | <i>HTRA3</i>        | 94031       | 773558      | 2.509196 | 0.0008 | +                 |
| AA043163      | ELK3, ETS-domain protein (SRF accessory protein 2)                                                               | <i>ELK3</i>         | 2004        | 486102      | 2.494976 | 0.0008 | -                 |
| AW087156      | Nuclear phosphoprotein similar to <i>S. cerevisiae</i> PWP1                                                      | <i>PWP1</i>         | 11137       | 2578263     | 2.470165 | 0.0002 | +                 |
| AA158540      | TBC1 domain family, member 14                                                                                    | <i>TBC1D14</i>      | 57533       | 592458      | 2.457798 | 0.001  | +                 |
| T60664        | AHNAK nucleoprotein (desmoyokin)                                                                                 | <i>AHNAK</i>        | 195         | 79216       | 2.422263 | 0.0006 | +                 |
| AI268273      | Mitogen-activated protein kinase kinase kinase 5                                                                 | <i>MAP3K5</i>       | 4217        | 1880757     | 2.421493 | 0.0008 | +                 |

|          |                                                                                                                       |                  |        |         |          |        |   |
|----------|-----------------------------------------------------------------------------------------------------------------------|------------------|--------|---------|----------|--------|---|
| N30348   | Fms-related tyrosine kinase 1 (vascular endothelial growth factor)/vascular permeability factor receptor              | <i>FLT1</i>      | 2321   | 258101  | 2.397606 | 0.0006 | - |
| A1440513 | Villin 2 (ezrin)                                                                                                      | <i>VIL2</i>      | 7430   | 2072783 | 2.352864 | 0.0008 | + |
| W58161   | Pinin, desmosome associated protein                                                                                   | <i>PNN</i>       | 5411   | 341051  | 2.349005 | 0.0002 | - |
| AA634300 | IGF-II mRNA-binding protein 2                                                                                         | <i>IMP-2</i>     | 10644  | 743774  | 2.346936 | 0.0002 | + |
| N67762   | Chromosome 9 open reading frame 21                                                                                    | <i>C9orf21</i>   | 195827 | 291403  | 2.345112 | 0.0002 | + |
| AA630100 | Hypothetical protein MGC17299                                                                                         | <i>MGC17299</i>  | 128218 | 854691  | 2.323185 | 0.0002 | - |
| AA864840 | Retinoic acid induced 14                                                                                              | <i>RAI14</i>     | 26064  | 1460073 | 2.309665 | 0.0008 | - |
| R76277   | Calmodulin 1 (phosphorylase kinase, delta)                                                                            | <i>CALM1</i>     | 801    | 144801  | 2.295832 | 0.0008 | - |
| AA668595 | Tumor protein p53 inducible protein 3                                                                                 | <i>TP53I3</i>    | 9540   | 859359  | 2.290491 | 0.0002 | + |
| BX098767 | Seryl-tRNA synthetase 2                                                                                               | <i>SARS2</i>     | 54938  | 809467  | 2.281401 | 0.001  | + |
| AA425588 | Integrin, alpha E (antigen CD103, human mucosal lymphocyte antigen 1; alpha polypeptide)                              | <i>ITGAE</i>     | 3682   | 773332  | 2.26545  | 0.0002 | + |
| BX099263 | Prominin 1                                                                                                            | <i>PROM1</i>     | 8842   | 27544   | 2.246197 | 0.0004 | + |
| H46554   | Transcription factor 8 (represses interleukin 2 expression)                                                           | <i>TCF8</i>      | 6935   | 178463  | 2.24379  | 0.0002 | - |
| N23340   | Hypothetical protein LOC152485                                                                                        | <i>LOC152485</i> | 152485 | 267186  | 2.230099 | 0.0004 | - |
| R01824   | Myofibrillogenesis regulator 1                                                                                        | <i>MR-1</i>      | 25953  | 124447  | 2.227693 | 0.0002 | + |
| AA486275 | Serine (or cysteine) proteinase inhibitor, clade B (ovalbumin), member 1                                              | <i>SERPINB1</i>  | 1992   | 842836  | 2.226654 | 0.0008 | + |
| AA187045 | Sialyltransferase 10 (alpha-2,3-sialyltransferase VI)                                                                 | <i>SIAT10</i>    | 10402  | 624372  | 2.226331 | 0.0006 | - |
| T58146   | HLA complex P5                                                                                                        | <i>HCP5</i>      | 10866  | 79254   | 2.225294 | 0.0004 | - |
| N32639   | Solute carrier family 7 (cationic amino acid transporter, y+ system), member 8                                        | <i>SLC7A8</i>    | 23428  | 267666  | 2.220183 | 0.0004 | + |
| T47228   | X 009 protein                                                                                                         | <i>MDS009</i>    | 56986  | 75919   | 2.217918 | 0.001  | + |
| BX112066 | Hypothetical protein FLJ38984                                                                                         | <i>FLJ38984</i>  | 127703 | 770380  | 2.213171 | 0.0002 | + |
| AA630534 | Kruppel-like factor 11                                                                                                | <i>KLF11</i>     | 8462   | 854789  | 2.193718 | 0.0006 | - |
| N57610   | HECT domain and ankyrin repeat containing, E3 ubiquitin protein ligase 1                                              | <i>HACE1</i>     | 57531  | 283430  | 2.180532 | 0.0002 | - |
| AA134531 | Hypothetical protein BC018415                                                                                         | <i>LOC130617</i> | 130617 | 502558  | 2.171082 | 0.0002 | + |
| AA886199 | Chromosome 1 open reading frame 34                                                                                    | <i>C1orf34</i>   | 22996  | 1492468 | 2.157518 | 0.0008 | + |
| AA293453 | Sideroflexin 3                                                                                                        | <i>SFXN3</i>     | 81855  | 726236  | 2.156278 | 0.001  | + |
| W02342   | Ceroid-lipofuscinosis, neuronal 5                                                                                     | <i>CLN5</i>      | 1203   | 292071  | 2.144411 | 0.001  | + |
| AW057757 | Palladin                                                                                                              | <i>KIAA0992</i>  | 23022  | 2542582 | 2.113065 | 0.0004 | + |
| AA228130 | PC4 and SFRS1 interacting protein 1                                                                                   | <i>PSIP1</i>     | 11168  | 667598  | 2.112296 | 0.001  | - |
| N31532   | Potassium channel tetramerisation domain containing 15                                                                | <i>KCTD15</i>    | 79047  | 266019  | 2.092832 | 0.0004 | + |
| AA999901 | Guanine nucleotide binding protein (G protein), gamma 11                                                              | <i>GNG11</i>     | 2791   | 1636447 | 2.086228 | 0.001  | - |
| AA412217 | Anaphase promoting complex subunit 1                                                                                  | <i>ANAPC1</i>    | 64682  | 731433  | 2.085086 | 0.0002 | + |
| AA464028 | Hypothetical protein FLJ14525                                                                                         | <i>FLJ14525</i>  | 84886  | 810603  | 2.081352 | 0.0002 | - |
| N94362   | Solute carrier family 35, member E3                                                                                   | <i>SLC35E3</i>   | 55508  | 309486  | 2.060098 | 0.0006 | - |
| AA629596 | Nipsnap homolog 3A (C. elegans)                                                                                       | <i>NIPSNAP3A</i> | 25934  | 884765  | 2.033848 | 0.0002 | + |
| AA479995 | Discs, large homolog 5 (Drosophila)                                                                                   | <i>DLG5</i>      | 9231   | 753969  | 2.000836 | 0.0006 | - |
| AA464688 | OCIA domain containing 2                                                                                              | <i>OCIAD2</i>    | 132299 | 810218  | 1.977171 | 0.0008 | - |
| AA460890 | Nedd4 family interacting protein 1                                                                                    | <i>NDFIP1</i>    | 80762  | 796739  | 1.93092  | 0.0008 | - |
| A1374985 | Growth arrest specific 2                                                                                              | <i>GAS2</i>      | 2620   | 2047854 | 1.862829 | 0.0008 | - |
| N63635   | Pim-1 oncogene                                                                                                        | <i>PIM1</i>      | 5292   | 292726  | 1.850285 | 0.0002 | - |
| AA626846 | Hypothetical LOC389025                                                                                                | <i>0</i>         | 389025 | 745190  | 1.849095 | 0.0002 | - |
| A1986457 | Serine (or cysteine) proteinase inhibitor, clade F (alpha-2 antiplasmin, pigment epithelium derived factor), member 1 | <i>SERPINF1</i>  | 5176   | 2562939 | 1.844415 | 0.0002 | - |
| AA457731 | SNARE protein Ykt6                                                                                                    | <i>YKT6</i>      | 10652  | 810762  | 1.734551 | 0.0004 | - |
| N21237   | SAM and SH3 domain containing 1                                                                                       | <i>SASH1</i>     | 23328  | 264938  | 1.727895 | 0.0008 | - |
| R83161   | GRB2-associated binding protein 1                                                                                     | <i>GAB1</i>      | 2549   | 194399  | 1.719901 | 0.001  | - |

\*Value from discriminatory analysis, with a high value indicating a high correlation with the classes.

†The plus (+) sign indicates relative up-regulation in *MLL*-positive ALLs, the minus (-) sign indicates up-regulation in B lineage.
