# Supplementary material
Source: PubMed Central journal article supplement (PMC1323166)
Supplement: pnas_0506637102_21.pdf [file pnas_0506637102_21.pdf]

**Table 22. The Top-100 differentially expressed genes in MLL as compared to AML**

| Accession no. | Gene name                                                                        | Gene symbol              | Entrez gene  | Reporter ID | Score*   | P      | Sign <sup>†</sup> |
|---------------|----------------------------------------------------------------------------------|--------------------------|--------------|-------------|----------|--------|-------------------|
| W48726        | Pre-B cell leukemia transcription factor 3                                       | <i>PBX3</i>              | 5090         | 325014      | 1.603556 | 0.0002 | +                 |
| AA460463      | Cytokine-like protein C17                                                        | <i>C17</i>               | 54360        | 796569      | 1.60094  | 0.0002 | -                 |
| AA778198      | Pre-B cell leukemia transcription factor 3                                       | <i>PBX3</i>              | 5090         | 448386      | 1.561468 | 0.0002 | +                 |
| AA055440      | Sprouty homolog 1, antagonist of FGF signaling (Drosophila)                      | <i>SPRY1</i>             | 10252        | 377468      | 1.542028 | 0.0002 | -                 |
| W86201        | Transmembrane 4 superfamily member 13                                            | <i>TM4SF13</i>           | 27075        | 416374      | 1.535125 | 0.0002 | -                 |
| H47496        | Multiple cluster hits:15792 & 496755                                             | <i>0 &amp; C14orf128</i> | 0 & 84837    | 193151      | 1.517486 | 0.0002 | -                 |
| AI681015      | Suppressor of cytokine signaling 6                                               | <i>SOCS6</i>             | 9306         | 2272331     | 1.512138 | 0.0002 | -                 |
| AA411757      | Carcinoembryonic antigen-related cell adhesion molecule 1 (biliary glycoprotein) | <i>CEACAM1</i>           | 634          | 753301      | 1.482417 | 0.0002 | -                 |
| AW075557      | Bromodomain adjacent to zinc finger domain, 2A                                   | <i>BAZ2A</i>             | 11176        | 2577057     | 1.471777 | 0.0002 | +                 |
| AA001444      | Meis1, myeloid ecotropic viral integration site 1 homolog (mouse)                | <i>MEIS1</i>             | 4211         | 361943      | 1.442485 | 0.0002 | +                 |
| AI298194      | Zinc finger protein 318                                                          | <i>ZNF318</i>            | 24149        | 1896746     | 1.425115 | 0.0002 | +                 |
| T71879        | Complement component 2                                                           | <i>C2</i>                | 717          | 85497       | 1.403062 | 0.0002 | +                 |
| BX112951      | Meis1, myeloid ecotropic viral integration site 1 homolog (mouse)                | <i>MEIS1</i>             | 4211         | 307506      | 1.383763 | 0.0002 | +                 |
| AA609759      | Multiple cluster hits:51120 & 172516                                             | <i>CAMP &amp; 0</i>      | 820 & 0      | 1031940     | 1.383739 | 0.0002 | -                 |
| AA436142      | Sparc/osteonectin, cwcv and kazal-like domains proteoglycan (testican)           | <i>SPOCK</i>             | 6695         | 754358      | 1.374911 | 0.0002 | +                 |
| AA460666      | NEDD9 interacting protein with calponin homology and LIM domains                 | <i>NICAL</i>             | 64780        | 796240      | 1.374325 | 0.0002 | +                 |
| T91261        | Mannosidase, alpha, class 1A, member 1                                           | <i>MAN1A1</i>            | 4121         | 112629      | 1.351699 | 0.0004 | -                 |
| N74131        | Trefoil factor 3 (intestinal)                                                    | <i>TFF3</i>              | 7033         | 298417      | 1.350444 | 0.0002 | -                 |
| BX094091      | Multiple cluster hits:9887 & 378808                                              | <i>0 &amp; eIF2A</i>     | 0 & 83939    | 41132       | 1.340339 | 0.0004 | +                 |
| BX088745      | B/K protein                                                                      | <i>LOC51760</i>          | 51760        | 1239845     | 1.333499 | 0.0002 | +                 |
| AA885342      | Hypothetical protein FLJ10379                                                    | <i>FLJ10379</i>          | 55133        | 1461767     | 1.329879 | 0.0004 | -                 |
| AA442095      | Neural precursor cell expressed, developmentally down-regulated 4                | <i>NEDD4</i>             | 4734         | 774751      | 1.324224 | 0.0006 | -                 |
| N47967        | Rho GTPase activating protein 5                                                  | <i>ARHGAP5</i>           | 394          | 281467      | 1.279156 | 0.0002 | -                 |
| BX116201      | Syntaxin binding protein 5 (tomosyn)                                             | <i>STXBP5</i>            | 134957       | 134537      | 1.279135 | 0.0004 | -                 |
| AA953229      | Homeo box A10                                                                    | <i>HOXA10</i>            | 3206         | 1592006     | 1.279019 | 0.0002 | +                 |
| BX102233      | Breast cancer 1, early onset                                                     | <i>BRCA1</i>             | 672          | 241474      | 1.277365 | 0.0002 | -                 |
| AA055194      | DEAH (Asp-Glu-Ala-His) box polypeptide 29                                        | <i>DHX29</i>             | 54505        | 377193      | 1.265058 | 0.0002 | -                 |
| AW057757      | Palladin                                                                         | <i>KIAA0992</i>          | 23022        | 2542582     | 1.261812 | 0.0002 | +                 |
| H20759        | Fasciculation and elongation protein zeta 1 (zygin I)                            | <i>FEZ1</i>              | 9638         | 51543       | 1.25626  | 0.0002 | +                 |
| AA883675      | ATPase, Ca++ transporting, type 2C, member 1                                     | <i>ATP2C1</i>            | 27032        | 1466621     | 1.250476 | 0.0004 | -                 |
| BX096034      | Asialoglycoprotein receptor 1                                                    | <i>ASGR1</i>             | 432          | 204541      | 1.247225 | 0.0004 | -                 |
| AI949576      | Annexin A3                                                                       | <i>ANXA3</i>             | 306          | 2469213     | 1.246393 | 0.0002 | -                 |
| AI393843      | Potassium voltage-gated channel, subfamily H (eag-related), member 2             | <i>KCNH2</i>             | 3757         | 2113077     | 1.243364 | 0.0004 | -                 |
| N47388        | Stonin 2                                                                         | <i>STN2</i>              | 85439        | 280602      | 1.238794 | 0.0004 | -                 |
| AA022910      | Hypothetical protein LOC339005                                                   | <i>LOC339005</i>         | 339005       | 364547      | 1.231266 | 0.0002 | +                 |
| R39069        | Phosphatidylinositol-4-phosphate 5-kinase, type I, beta                          | <i>PIP5K1B</i>           | 8395         | 24918       | 1.192449 | 0.0002 | -                 |
| BX106607      | CDNA: FLJ22133 fis, clone HEP20529                                               | <i>0</i>                 | 0            | 385031      | 1.187667 | 0.0004 | +                 |
| BX102630      | Mannosidase, alpha, class 1A, member 1                                           | <i>MAN1A1</i>            | 4121         | 823688      | 1.182787 | 0.0002 | -                 |
| AI985214      | Tissue factor pathway inhibitor (lipoprotein-associated coagulation inhibitor)   | <i>TFPI</i>              | 7035         | 2495781     | 1.177553 | 0.0002 | -                 |
| CR740426      | Testis expressed gene 9                                                          | <i>TEX9</i>              | 374618       | 704261      | 1.177399 | 0.0002 | -                 |
| AA012892      | Cysteine-rich, angiogenic inducer, 61                                            | <i>CYR61</i>             | 3491         | 360254      | 1.17596  | 0.0002 | -                 |
| AA629926      | Zinc finger protein 544                                                          | <i>ZNF544</i>            | 27300        | 884683      | 1.171308 | 0.0004 | -                 |
| AA863469      | Lipoma HMGIC fusion partner-like 2                                               | <i>LHFPL2</i>            | 10184        | 1469377     | 1.166668 | 0.0004 | -                 |
| BX098640      | Kruppel-like factor 1 (erythroid)                                                | <i>KLF1</i>              | 10661        | 211216      | 1.158554 | 0.0004 | -                 |
| W47077        | Latexin                                                                          | <i>LXN</i>               | 56925        | 325070      | 1.144956 | 0.0008 | -                 |
| AA775576      | EMI domain containing 1                                                          | <i>EMID1</i>             | 129080       | 378420      | 1.144665 | 0.0006 | -                 |
| AA453789      | Multiple cluster hits:90572 & 460468                                             | <i>PTK7 &amp; XPO6</i>   | 5754 & 23214 | 813742      | 1.124768 | 0.0004 | -                 |

|          |                                                                                         |                               |               |         |          |        |   |
|----------|-----------------------------------------------------------------------------------------|-------------------------------|---------------|---------|----------|--------|---|
| AA464421 | Multiple cluster hits:371617 & 462923                                                   | <i>RNF110 &amp; LOC284106</i> | 7703 & 284106 | 809916  | 1.123356 | 0.0004 | + |
| AA633658 | Amyloid beta (A4) precursor protein (protease nexin-II, Alzheimer disease)              | <i>APP</i>                    | 351           | 856575  | 1.123121 | 0.0002 | - |
| AW074796 | Catechol-O-methyltransferase domain containing 1                                        | <i>COMTD1</i>                 | 118881        | 2572170 | 1.117711 | 0.0006 | + |
| BX103040 | A kinase (PRKA) anchor protein (gravin) 12                                              | <i>AKAP12</i>                 | 9590          | 784772  | 1.117277 | 0.0002 | - |
| AA427666 | Potassium voltage-gated channel, subfamily H (eag-related), member 2                    | <i>KCNH2</i>                  | 3757          | 770012  | 1.113482 | 0.0002 | - |
| N24824   | V-kit Hardy-Zuckerman 4 feline sarcoma viral oncogene homolog                           | <i>KIT</i>                    | 3815          | 269806  | 1.112017 | 0.0004 | - |
| AA453673 | Arginase, liver                                                                         | <i>ARG1</i>                   | 383           | 813635  | 1.111063 | 0.0002 | - |
| AA620859 | Sarcospan (Kras oncogene-associated gene)                                               | <i>SSPN</i>                   | 8082          | 1049330 | 1.108099 | 0.0006 | - |
| AA401578 | Chromosome 16 open reading frame 5                                                      | <i>C16orf5</i>                | 29965         | 742562  | 1.103543 | 0.0004 | - |
| AA016225 | Chromosome 9 open reading frame 123                                                     | <i>C9orf123</i>               | 90871         | 359269  | 1.102292 | 0.0004 | + |
| AA887320 | SH3 multiple domains 1                                                                  | <i>SH3MD1</i>                 | 9644          | 1500815 | 1.094942 | 0.0002 | - |
| H90152   | Growth hormone regulated TBC protein 1                                                  | <i>GRTP1</i>                  | 79774         | 240896  | 1.094496 | 0.0004 | - |
| N49899   | Solute carrier family 18 (vesicular monoamine), member 2                                | <i>SLC18A2</i>                | 6571          | 243653  | 1.079465 | 0.0002 | - |
| AA489040 | Ecotropic viral integration site 2A                                                     | <i>EV12A</i>                  | 2123          | 824933  | 1.079015 | 0.0004 | - |
| AA978354 | O-6-methylguanine-DNA methyltransferase                                                 | <i>MGMT</i>                   | 4255          | 1588791 | 1.076021 | 0.0004 | - |
| N27159   | Inhibin, beta A (activin A, activin AB alpha polypeptide)                               | <i>INHBA</i>                  | 3624          | 269815  | 1.075447 | 0.0006 | - |
| AA044031 | Hypothetical protein DKFZp762C1112                                                      | <i>DKFZp762C1112</i>          | 169200        | 486626  | 1.072009 | 0.0004 | - |
| AA421504 | Mannosyl (beta-1,4-)-glycoprotein beta-1,4-N-acetylglucosaminyltransferase              | <i>MGAT3</i>                  | 4248          | 731060  | 1.066855 | 0.0002 | - |
| AA960970 | Transcribed locus                                                                       | <i>0</i>                      | 0             | 1564175 | 1.064517 | 0.0004 | - |
| A1708846 | WD repeat domain 9                                                                      | <i>WDR9</i>                   | 54014         | 2318439 | 1.062286 | 0.0004 | - |
| A1799757 | Immunoglobulin heavy variable 1/OR15-1                                                  | <i>0</i>                      | 388077        | 2320870 | 1.061124 | 0.0002 | - |
| AA155640 | Transcobalamin I (vitamin B12 binding protein, R binder family)                         | <i>TCN1</i>                   | 6947          | 592243  | 1.060907 | 0.0008 | - |
| N52651   | Growth hormone regulated TBC protein 1                                                  | <i>GRTP1</i>                  | 79774         | 245039  | 1.059999 | 0.0002 | - |
| A1076601 | MRNA full length insert cDNA clone EUOIMAGE 31619                                       | <i>0</i>                      | 0             | 1676920 | 1.058532 | 0.0002 | - |
| N30372   | Interferon regulatory factor 5                                                          | <i>IRF5</i>                   | 3663          | 260035  | 1.057563 | 0.0002 | - |
| W30988   | Multiple cluster hits:9613 & 549764                                                     | <i>ANGPTLA &amp; 0</i>        | 51129 & 0     | 310356  | 1.057379 | 0.0004 | - |
| A1360196 | Huntingtin interacting protein 2                                                        | <i>HIP2</i>                   | 3093          | 2018680 | 1.0549   | 0.0004 | + |
| R38669   | Rho-related BTB domain containing 2                                                     | <i>RHOBTB2</i>                | 23221         | 23333   | 1.0502   | 0.0004 | + |
| N46335   | Suppressor of cytokine signaling 6                                                      | <i>SOCS6</i>                  | 9306          | 279232  | 1.049307 | 0.0008 | - |
| H84154   | Cyclin D2                                                                               | <i>CCND2</i>                  | 894           | 249688  | 1.048447 | 0.0004 | - |
| W31815   | Multiple cluster hits:432390 & 520245                                                   | <i>DNAH11 &amp; RAM2</i>      | 8701 & 55536  | 320455  | 1.043335 | 0.0004 | - |
| AA459589 | Tumor protein p53 inducible nuclear protein 1                                           | <i>TP53INP1</i>               | 94241         | 814528  | 1.039437 | 0.0002 | - |
| AA489421 | Stomatin                                                                                | <i>STOM</i>                   | 2040          | 843374  | 1.03717  | 0.0002 | - |
| AA432256 | Thyroid hormone receptor interactor 12                                                  | <i>TRIP12</i>                 | 9320          | 782314  | 1.033773 | 0.0002 | - |
| H90949   | ADP-ribosylation factor guanine nucleotide-exchange factor 1(brefeldin A-inhibited)     | <i>ARFGEF1</i>                | 10565         | 240680  | 1.03305  | 0.0008 | - |
| AA293700 | FLJ44216 protein                                                                        | <i>FLJ44216</i>               | 375484        | 725618  | 1.032554 | 0.0008 | + |
| BX112804 | Brevican                                                                                | <i>BCAN</i>                   | 63827         | 32687   | 1.03133  | 0.0004 | + |
| AA677706 | Lactotransferrin                                                                        | <i>LTF</i>                    | 4057          | 460487  | 1.029736 | 0.0002 | - |
| H54505   | Non-metastatic cells 4, protein expressed in                                            | <i>NME4</i>                   | 4833          | 203003  | 1.028054 | 0.0008 | - |
| T68845   | Dexamethasone-induced transcript                                                        | <i>DEXI</i>                   | 28955         | 82173   | 1.023797 | 0.0002 | + |
| AA424971 | Multiple cluster hits:281434 & 412293                                                   | <i>SIAT7B &amp; NCOA1</i>     | 10610 & 8648  | 768469  | 1.02193  | 0.0008 | - |
| AA447599 | Cytoplasmic linker associated protein 2                                                 | <i>CLASP2</i>                 | 23122         | 782700  | 1.021147 | 0.0002 | + |
| AA425184 | Sperm associated antigen 16                                                             | <i>SPAG16</i>                 | 79582         | 772944  | 1.020768 | 0.0008 | - |
| AA916325 | Aldo-keto reductase family 1, member C3 (3-alpha hydroxysteroid dehydrogenase, type II) | <i>AKR1C3</i>                 | 8644          | 1473304 | 1.015242 | 0.0008 | - |
| AA489276 | Transcription factor RAM2                                                               | <i>RAM2</i>                   | 55536         | 842896  | 1.014345 | 0.0002 | - |
| T62715   | Aldo-keto reductase family 7, member A2 (aflatoxin aldehyde reductase)                  | <i>AKR7A2</i>                 | 8574          | 79592   | 1.014097 | 0.0008 | + |
| AW070907 | Sphingomyelin phosphodiesterase, acid-like 3B                                           | <i>SMPDL3B</i>                | 27293         | 2568386 | 1.012995 | 0.0002 | - |
| A1745626 | Metallothionein 1G                                                                      | <i>MT1G</i>                   | 4495          | 2317017 | 1.010894 | 0.0008 | - |
| N64405   | Golgi phosphoprotein 3-like                                                             | <i>GOLPH3L</i>                | 55204         | 290261  | 1.010811 | 0.0002 | - |

|          |                                                       |                           |              |        |          |        |   |
|----------|-------------------------------------------------------|---------------------------|--------------|--------|----------|--------|---|
| H29713   | Chromosome 6 open reading frame 33                    | <i>C6orf33</i>            | 85315        | 52865  | 1.009647 | 0.0004 | + |
| AA456265 | Coagulation factor II (thrombin) receptor-like 1      | <i>F2RL1</i>              | 2150         | 811899 | 1.006964 | 0.001  | - |
| AA490494 | Tumor necrosis factor receptor superfamily, member 21 | <i>TNFRSF21</i>           | 27242        | 823902 | 1.005138 | 0.0004 | - |
| CR738780 | Multiple cluster hits:352839 & 444409                 | <i>MRPS15 &amp; MEF2C</i> | 64960 & 4208 | 825232 | 0.999579 | 0.001  | + |

\*Value from discriminatory analysis, with a high value indicating a high correlation with the classes.

†The plus (+) sign indicates relative up-regulation in *MLL*-positive AMLs, the minus (-) sign indicates up-regulation in AML.
