# Supplementary material
Source: PubMed Central journal article supplement (PMC1323166)
Supplement: pnas_0506637102_22.pdf [file pnas_0506637102_22.pdf]

**Table 23. The top-100 differentially expressed genes in *MLL* vs. B lineage ALL and AML**

| Accession no. | Gene name                                                                               | Gene symbol            | Entrez gene  | Reporter ID | Score*   | P      | Sign <sup>†</sup> |
|---------------|-----------------------------------------------------------------------------------------|------------------------|--------------|-------------|----------|--------|-------------------|
| AA001444      | Meis1, myeloid ecotropic viral integration site 1 homolog (mouse)                       | <i>MEIS1</i>           | 4211         | 361943      | 1.227079 | 0.0002 | +                 |
| AA953229      | Homeo box A10                                                                           | <i>HOXA10</i>          | 3206         | 1592006     | 1.158795 | 0.0002 | +                 |
| AA778198      | Pre-B cell leukemia transcription factor 3                                              | <i>PBX3</i>            | 5090         | 448386      | 1.034786 | 0.0002 | +                 |
| AA775357      | Similar to jumonji domain containing 1A; testis-specific protein A; zinc finger protein | <i>0</i>               | 439979       | 878680      | 0.898084 | 0.0002 | +                 |
| AA055440      | Sprouty homolog 1, antagonist of FGF signaling (Drosophila)                             | <i>SPRY1</i>           | 10252        | 377468      | 0.884926 | 0.0002 | -                 |
| AA460463      | Cytokine-like protein C17                                                               | <i>C17</i>             | 54360        | 796569      | 0.781291 | 0.0002 | -                 |
| AW057757      | Palladin                                                                                | <i>KIAA0992</i>        | 23022        | 2542582     | 0.777822 | 0.0002 | +                 |
| BX281560      | Nuclear RNA export factor 3                                                             | <i>NXF3</i>            | 56000        | 430291      | 0.757324 | 0.0002 | -                 |
| AA629926      | Zinc finger protein 544                                                                 | <i>ZNF544</i>          | 27300        | 884683      | 0.756505 | 0.0002 | -                 |
| AA664020      | Deleted in liver cancer 1                                                               | <i>DLC1</i>            | 10395        | 855422      | 0.749944 | 0.0002 | -                 |
| AA489040      | Ecotropic viral integration site 2A                                                     | <i>EV12A</i>           | 2123         | 824933      | 0.742808 | 0.0002 | -                 |
| AA411757      | Carcinoembryonic antigen-related cell adhesion molecule 1 (biliary glycoprotein)        | <i>CEACAM1</i>         | 634          | 753301      | 0.735312 | 0.0002 | -                 |
| H90152        | Growth hormone regulated TBC protein 1                                                  | <i>GRTP1</i>           | 79774        | 240896      | 0.720316 | 0.0002 | -                 |
| W86201        | Transmembrane 4 superfamily member 13                                                   | <i>TM4SF13</i>         | 27075        | 416374      | 0.715215 | 0.0002 | -                 |
| AA016225      | Chromosome 9 open reading frame 123                                                     | <i>C9orf123</i>        | 90871        | 359269      | 0.702891 | 0.0002 | +                 |
| BX112804      | Brevican                                                                                | <i>BCAN</i>            | 63827        | 32687       | 0.702151 | 0.0002 | +                 |
| AA436506      | Nuclear factor I/X (CCAAT binding transcription factor)                                 | <i>NFIX</i>            | 4784         | 753034      | 0.693566 | 0.0002 | -                 |
| AA486942      | Capping protein (actin filament), gelsolin-like                                         | <i>CAPG</i>            | 822          | 841059      | 0.680292 | 0.0002 | +                 |
| T91261        | Mannosidase, alpha, class 1A, member 1                                                  | <i>MAN1A1</i>          | 4121         | 112629      | 0.672439 | 0.0004 | -                 |
| AA055194      | DEAH (Asp-Glu-Ala-His) box polypeptide 29                                               | <i>DHX29</i>           | 54505        | 377193      | 0.67237  | 0.0002 | -                 |
| AA701996      | Delta-like 1 homolog (Drosophila)                                                       | <i>DLK1</i>            | 8788         | 436121      | 0.666669 | 0.0002 | -                 |
| N53061        | Hypothetical protein MGC5242                                                            | <i>MGC5242</i>         | 78996        | 246546      | 0.663319 | 0.0002 | -                 |
| AI745626      | Metallothionein 1G                                                                      | <i>MT1G</i>            | 4495         | 2317017     | 0.660308 | 0.0002 | -                 |
| W74533        | Latrophilin 2                                                                           | <i>LPHN2</i>           | 23266        | 346583      | 0.659638 | 0.0002 | -                 |
| AA453789      | Multiple cluster hits:90572 & 460468                                                    | <i>PTK7 &amp; XPO6</i> | 5754 & 23214 | 813742      | 0.656895 | 0.0002 | -                 |
| AA401578      | Chromosome 16 open reading frame 5                                                      | <i>C16orf5</i>         | 29965        | 742562      | 0.648482 | 0.0002 | -                 |
| BX104994      | RNA binding protein with multiple splicing 2                                            | <i>RBPM52</i>          | 348093       | 136668      | 0.64436  | 0.0002 | -                 |
| AI984983      | Phospholipase A2, group IVA (cytosolic, calcium-dependent)                              | <i>PLA2G4A</i>         | 5321         | 2494805     | 0.64402  | 0.0002 | +                 |
| AA490700      | Myosin, heavy polypeptide 10, non-muscle                                                | <i>MYH10</i>           | 4628         | 823886      | 0.643793 | 0.0004 | -                 |
| AA452937      | Syntaxin binding protein 6 (amisyn)                                                     | <i>STXBP6</i>          | 29091        | 788524      | 0.640349 | 0.0002 | -                 |
| AA447599      | Cytoplasmic linker associated protein 2                                                 | <i>CLASP2</i>          | 23122        | 782700      | 0.64021  | 0.0002 | +                 |
| N24824        | V-kit Hardy-Zuckerman 4 feline sarcoma viral oncogene homolog                           | <i>KIT</i>             | 3815         | 269806      | 0.639918 | 0.0004 | -                 |
| H59916        | Multiple cluster hits:375108 & 511464                                                   | <i>CD24 &amp; 0</i>    | 934 & 440281 | 204335      | 0.638075 | 0.0002 | -                 |
| T71879        | Complement component 2                                                                  | <i>C2</i>              | 717          | 85497       | 0.636721 | 0.0002 | +                 |
| AA872011      | AXIN1 up-regulated 1                                                                    | <i>AXUD1</i>           | 64651        | 1475662     | 0.635138 | 0.0002 | -                 |
| H84154        | Cyclin D2                                                                               | <i>CCND2</i>           | 894          | 249688      | 0.634396 | 0.0004 | -                 |
| AA421691      | UDP-glucose ceramide glucosyltransferase                                                | <i>UGCG</i>            | 7357         | 739123      | 0.632531 | 0.0004 | -                 |
| BX116210      | Apolipoprotein C-II                                                                     | <i>APOC2</i>           | 344          | 809523      | 0.632069 | 0.0002 | +                 |
| N20003        | Chromosome 2 open reading frame 32                                                      | <i>C2orf32</i>         | 25927        | 263341      | 0.631874 | 0.0004 | -                 |
| BX106131      | Thyrotropin-releasing hormone                                                           | <i>TRH</i>             | 7200         | 382787      | 0.630144 | 0.0002 | -                 |
| AI681015      | Suppressor of cytokine signaling 6                                                      | <i>SOCS6</i>           | 9306         | 2272331     | 0.630138 | 0.0002 | -                 |
| AI927284      | Lectin, galactoside-binding, soluble, 1 (galectin 1)                                    | <i>LGALS1</i>          | 3956         | 2461050     | 0.622729 | 0.0004 | +                 |
| BX102233      | Breast cancer 1, early onset                                                            | <i>BRCA1</i>           | 672          | 241474      | 0.621966 | 0.0002 | -                 |
| BX094473      | Syntrophin, beta 2 (dystrophin-associated protein A1, 59kDa, basic component 2)         | <i>SNTB2</i>           | 6645         | 263271      | 0.620887 | 0.0002 | -                 |
| H10488        | Adenylate kinase 2                                                                      | <i>AK2</i>             | 204          | 45464       | 0.620681 | 0.0002 | +                 |
| AA894557      | Creatine kinase, brain                                                                  | <i>CKB</i>             | 1152         | 1416782     | 0.616469 | 0.0002 | -                 |
| N68644        | Fibroblast growth factor receptor 3 (achondroplasia, thanatophoric dwarfism)            | <i>FGFR3</i>           | 2261         | 293164      | 0.612566 | 0.0002 | -                 |

|          |                                                                                                              |                          |              |         |          |        |   |
|----------|--------------------------------------------------------------------------------------------------------------|--------------------------|--------------|---------|----------|--------|---|
| R11551   | Cholesteryl ester transfer protein, plasma                                                                   | <i>CETP</i>              | 1071         | 129988  | 0.6113   | 0.0002 | - |
| AA421512 | Islet cell autoantigen 1, 69kDa                                                                              | <i>ICA1</i>              | 3382         | 731129  | 0.610653 | 0.0002 | - |
| BX099462 | Hypoxia-inducible factor 1, alpha subunit (basic helix-loop-helix transcription factor)                      | <i>HIF1A</i>             | 3091         | 325117  | 0.6101   | 0.0004 | - |
| AA436142 | Sparc/osteonectin, cwcv and kazal-like domains proteoglycan (testican)                                       | <i>SPOCK</i>             | 6695         | 754358  | 0.607729 | 0.0002 | + |
| AA620591 | CDNA clone MGC:24463 IMAGE:4082362, complete cds                                                             | <i>0</i>                 | 0            | 951313  | 0.606492 | 0.0004 | + |
| AA703392 | Complement factor H-related 1                                                                                | <i>CFHL1</i>             | 3078         | 450060  | 0.606382 | 0.0002 | - |
| A1652223 | Wingless-type MMTV integration site family, member 10B                                                       | <i>WNT10B</i>            | 7480         | 2306221 | 0.599535 | 0.0002 | + |
| N67007   | Multiple cluster hits:268326 & 371021                                                                        | <i>OCIL &amp; LAPTM5</i> | 29121 & 7805 | 295868  | 0.597951 | 0.0004 | + |
| N47388   | Stonin 2                                                                                                     | <i>STN2</i>              | 85439        | 280602  | 0.597944 | 0.0006 | - |
| AA070226 | Selenoprotein P, plasma, 1                                                                                   | <i>SEPP1</i>             | 6414         | 530814  | 0.596706 | 0.0006 | - |
| AA293453 | Sideroflexin 3                                                                                               | <i>SFXN3</i>             | 81855        | 726236  | 0.596697 | 0.0004 | + |
| AA128553 | Amyloid beta (A4) precursor protein (protease nexin-II, Alzheimer disease)                                   | <i>APP</i>               | 351          | 526616  | 0.594608 | 0.0004 | - |
| A1302421 | Lectin-like NK cell receptor                                                                                 | <i>OCIL</i>              | 29121        | 1901749 | 0.592973 | 0.0006 | + |
| N74131   | Trefoil factor 3 (intestinal)                                                                                | <i>TFF3</i>              | 7033         | 298417  | 0.588496 | 0.0002 | - |
| H90975   | Neural precursor cell expressed, developmentally down-regulated 4                                            | <i>NEDD4</i>             | 4734         | 240711  | 0.58637  | 0.0002 | - |
| H77541   | Multiple cluster hits:95990 & 284171                                                                         | <i>PKLR &amp; HCN3</i>   | 5313 & 57657 | 234522  | 0.584502 | 0.0002 | - |
| AA707413 | Myc target 1                                                                                                 | <i>MYCT1</i>             | 80177        | 451557  | 0.582221 | 0.0002 | - |
| AA490828 | Chromosome 2 open reading frame 22                                                                           | <i>C2orf22</i>           | 130814       | 824312  | 0.582145 | 0.001  | + |
| T62715   | Aldo-keto reductase family 7, member A2 (aflatoxin aldehyde reductase)                                       | <i>AKR7A2</i>            | 8574         | 79592   | 0.580977 | 0.0008 | + |
| BX107491 | Vitamin K epoxide reductase complex, subunit 1-like 1                                                        | <i>VKORC1L1</i>          | 154807       | 470006  | 0.576444 | 0.0006 | - |
| W52082   | Mitochondrial ribosomal protein L33                                                                          | <i>MRPL33</i>            | 9553         | 325520  | 0.575207 | 0.0002 | + |
| AA778089 | Leucine rich repeat neuronal 1                                                                               | <i>LRRN1</i>             | 57633        | 379709  | 0.571392 | 0.0002 | - |
| T56858   | Growth factor independent 1B (potential regulator of CDKN1A, translocated in CML)                            | <i>GFI1B</i>             | 8328         | 68266   | 0.568516 | 0.0002 | - |
| AA863469 | Lipoma HMGIC fusion partner-like 2                                                                           | <i>LHFPL2</i>            | 10184        | 1469377 | 0.567917 | 0.0002 | - |
| H47496   | Multiple cluster hits:15792 & 496755                                                                         | <i>0 &amp; C14orf128</i> | 0 & 84837    | 193151  | 0.563181 | 0.0002 | - |
| AA634300 | IGF-II mRNA-binding protein 2                                                                                | <i>IMP-2</i>             | 10644        | 743774  | 0.562522 | 0.0004 | + |
| BX096034 | Asialoglycoprotein receptor 1                                                                                | <i>ASGR1</i>             | 432          | 204541  | 0.56215  | 0.0006 | - |
| BX089808 | Hypothetical protein LOC285812                                                                               | <i>LOC285812</i>         | 285812       | 32522   | 0.558178 | 0.0006 | - |
| A1799757 | Immunoglobulin heavy variable 1/OR15-1                                                                       | <i>0</i>                 | 388077       | 2320870 | 0.557547 | 0.0006 | - |
| BX101261 | Homeo box A4                                                                                                 | <i>HOXA4</i>             | 3201         | 785930  | 0.556587 | 0.0004 | + |
| AA886758 | Chromosome 1 open reading frame 24                                                                           | <i>C1orf24</i>           | 116496       | 1500241 | 0.55626  | 0.001  | - |
| AA677025 | Similar to annexin II receptor                                                                               | <i>0</i>                 | 389289       | 454564  | 0.556239 | 0.0008 | + |
| A1888228 | Alanyl (membrane) aminopeptidase (aminopeptidase N, aminopeptidase M, microsomal aminopeptidase, CD13, p150) | <i>ANPEP</i>             | 290          | 2441080 | 0.556196 | 0.0008 | - |
| BX094091 | Multiple cluster hits:9887 & 378808                                                                          | <i>0 &amp; eIF2A</i>     | 0 & 83939    | 41132   | 0.555618 | 0.0004 | + |
| N90806   | Hypothetical protein FLJ14054                                                                                | <i>FLJ14054</i>          | 79614        | 303139  | 0.552296 | 0.0002 | - |
| N49899   | Solute carrier family 18 (vesicular monoamine), member 2                                                     | <i>SLC18A2</i>           | 6571         | 243653  | 0.550712 | 0.0004 | - |
| AA427666 | Potassium voltage-gated channel, subfamily H (eag-related), member 2                                         | <i>KCNH2</i>             | 3757         | 770012  | 0.548369 | 0.0008 | - |
| H71081   | Hexosaminidase B (beta polypeptide)                                                                          | <i>HEXB</i>              | 3074         | 211780  | 0.546825 | 0.0006 | + |
| N59851   | WAS protein family, member 1                                                                                 | <i>WASF1</i>             | 8936         | 284734  | 0.546503 | 0.001  | - |
| BX088745 | B/K protein                                                                                                  | <i>LOC51760</i>          | 51760        | 1239845 | 0.54611  | 0.0002 | + |
| AA629591 | Testis enhanced gene transcript (BAX inhibitor 1)                                                            | <i>TEGT</i>              | 7009         | 884766  | 0.544982 | 0.0002 | - |
| AA421504 | Mannosyl (beta-1,4-)-glycoprotein beta-1,4-N-acetylglucosaminyltransferase                                   | <i>MGAT3</i>             | 4248         | 731060  | 0.544465 | 0.0004 | - |
| AW075557 | Bromodomain adjacent to zinc finger domain, 2A                                                               | <i>BAZ2A</i>             | 11176        | 2577057 | 0.543388 | 0.0006 | + |
| AW029299 | Interleukin 17 receptor                                                                                      | <i>IL17R</i>             | 23765        | 2543085 | 0.541034 | 0.0008 | + |
| BX099294 | UDP-Gal:betaGlcNAc beta 1,4- galactosyltransferase, polypeptide 6                                            | <i>B4GALT6</i>           | 9331         | 396098  | 0.539697 | 0.0002 | - |
| N63988   | Interferon-induced protein with tetratricopeptide repeats 2                                                  | <i>IFIT2</i>             | 3433         | 289496  | 0.539248 | 0.001  | - |
| BX105581 | Lymphocyte antigen 86                                                                                        | <i>LY86</i>              | 9450         | 2333826 | 0.538831 | 0.001  | + |
| H29077   | Lysosomal-associated membrane protein 1                                                                      | <i>LAMP1</i>             | 3916         | 49710   | 0.535673 | 0.001  | - |
| N27159   | Inhibin, beta A (activin A, activin AB alpha polypeptide)                                                    | <i>INHBA</i>             | 3624         | 269815  | 0.533414 | 0.0008 | - |
| T82077   | Cell division cycle 27                                                                                       | <i>CDC27</i>             | 996          | 109708  | 0.533294 | 0.001  | + |

|          |                                                                                   |               |      |        |          |       |   |
|----------|-----------------------------------------------------------------------------------|---------------|------|--------|----------|-------|---|
| R66325   | Colony stimulating factor 2 receptor, beta, low-affinity (granulocyte-macrophage) | <i>CSF2RB</i> | 1439 | 141115 | 0.531242 | 0.001 | - |
| AA480851 | Claudin 10                                                                        | <i>CLDN10</i> | 9071 | 810761 | 0.529968 | 0.001 | - |
| T48950   | Rhesus blood group-associated glycoprotein                                        | <i>RHAG</i>   | 6005 | 70489  | 0.52818  | 0.001 | - |

\*Value from discriminatory analysis, with a high value indicating a high correlation with the classes.

†The plus (+) sign indicates relative up-regulation in *MLL*-positive leukemias, the minus (-) sign indicates up-regulation the remaining leukemias
