# Supplementary material
Source: PubMed Central journal article supplement (PMC1323166)
Supplement: pnas_0506637102_23.pdf [file pnas_0506637102_23.pdf]

**Table 24. Gene order according to the hierarchical clustering of the top-200 genes of *TCF3/PBX1* and the normal bone marrows and purified hematoietic cells**

| Accession | Gene name                                                                    | Gene symbol               | Entrez gene  | Reporter ID | Signature |
|-----------|------------------------------------------------------------------------------|---------------------------|--------------|-------------|-----------|
| AA428001  | Activated Cdc42-associated kinase 1                                          | <i>ACK1</i>               | 10188        | 773478      |           |
| AA485865  | Interleukin 7 receptor                                                       | <i>IL7R</i>               | 3575         | 840460      |           |
| BX096523  | Uronyl-2-sulfotransferase                                                    | <i>UST</i>                | 10090        | 505335      |           |
| AA703219  | Dedicator of cytokinesis 10                                                  | <i>DOCK10</i>             | 55619        | 435992      |           |
| AI369885  | Ubiquitin-conjugating enzyme E2, J2 (UBC6 homolog, yeast)                    | <i>UBE2J2</i>             | 118424       | 2017705     |           |
| AW009108  | Interferon stimulated gene 20kDa                                             | <i>ISG20</i>              | 3669         | 2503967     |           |
| R93279    | Multiple cluster hits:415117 & 549825                                        | <i>SIAT9 &amp; 0</i>      | 8869 & 0     | 275798      |           |
| AA429248  | HGFL gene                                                                    | <i>MGC17330</i>           | 113791       | 769796      |           |
| AA434587  | Multiple cluster hits:476365 & 502004                                        | <i>SCP2 &amp; RRAS2</i>   | 6342 & 22800 | 773674      |           |
| BX105103  | Leucine rich repeat containing 28                                            | <i>LRRC28</i>             | 123355       | 198694      |           |
| AA165567  | Mitogen-activated protein kinase kinase kinase 1                             | <i>MAP3K1</i>             | 4214         | 593306      |           |
| AA009593  | Membrane protein, palmitoylated 7 (MAGUK p55 subfamily member 7)             | <i>MPP7</i>               | 143098       | 365517      |           |
| BX103840  | Snf2-related CBP activator protein                                           | <i>SRCAP</i>              | 10847        | 429446      |           |
| AA282272  | Acyl-Coenzyme A dehydrogenase family, member 8                               | <i>ACAD8</i>              | 27034        | 712950      |           |
| AI651167  | Similar to tripartite motif-containing 16; estrogen-responsive B box protein | <i>0</i>                  | 147166       | 2298710     |           |
| R19233    | Pleckstrin homology domain containing, family A member 2                     | <i>PLEKHA7</i>            | 144100       | 33028       |           |
| AA152294  | Presenilin 2 (Alzheimer disease 4)                                           | <i>PSEN2</i>              | 5664         | 491232      |           |
| AA489331  | Adenosine deaminase, RNA-specific, B1 (RED1 homolog rat)                     | <i>ADAR1</i>              | 104          | 842939      |           |
| AA458653  | Tribbles homolog 2 (Drosophila)                                              | <i>TRIB2</i>              | 28951        | 813426      | Leukemic  |
| AA460810  | RUN and TBC1 domain containing 3                                             | <i>RUTBC3</i>             | 27352        | 796083      | Leukemic  |
| BX105523  | HECT, C2 and WW domain containing E3 ubiquitin protein ligase 1              | <i>NEDL1</i>              | 23072        | 180885      | Leukemic  |
| N35393    | IQ motif containing E                                                        | <i>IQCE</i>               | 23288        | 272100      | Leukemic  |
| AA706935  | Exostoses (multiple)-like 3                                                  | <i>EXTL3</i>              | 2137         | 451871      | Leukemic  |
| AI979331  | Core-binding factor, beta subunit                                            | <i>CBFB</i>               | 865          | 2515917     | Leukemic  |
| BX099314  | Chemokine-like factor super family 7                                         | <i>CKLFSF7</i>            | 112616       | 810002      | Leukemic  |
| R88680    | Hypothetical protein MGC10485                                                | <i>MGC10485</i>           | 112936       | 166530      | Leukemic  |
| N50428    | Hypothetical protein FLJ30046                                                | <i>FLJ30046</i>           | 122060       | 280640      | Leukemic  |
| AA293700  | FLJ44216 protein                                                             | <i>FLJ44216</i>           | 375484       | 725618      | Leukemic  |
| H17927    | Thioredoxin-like 2                                                           | <i>TXNL2</i>              | 10539        | 50743       | Leukemic  |
| AA478659  | Nidogen 2 (osteonidogen)                                                     | <i>NID2</i>               | 22795        | 754093      | Leukemic  |
| AA946776  | Fibroblast growth factor 9 (glia-activating factor)                          | <i>FGF9</i>               | 2254         | 1589786     | Leukemic  |
| AI698719  | Myeloid/lymphoid or mixed-lineage leukemia 2                                 | <i>MLL2</i>               | 8085         | 2302544     | Leukemic  |
| AA394127  | Nuclear factor of activated T cells, cytoplasmic, calcineurin-dependent 4    | <i>NFATC4</i>             | 4776         | 725649      | Leukemic  |
| AA418036  | GLI-Kruppel family member GLI3 (Greig cephalopolysyndactyly syndrome)        | <i>GLI3</i>               | 2737         | 767495      | Leukemic  |
| H22559    | Formin homology 2 domain containing 3                                        | <i>FHOD3</i>              | 80206        | 51807       | Leukemic  |
| AA425618  | Immunoglobulin superfamily, member 3                                         | <i>IGSF3</i>              | 3321         | 773335      | Leukemic  |
| BX116075  | BUB3 budding uninhibited by benzimidazoles 3 homolog (yeast)                 | <i>BUB3</i>               | 9184         | 191904      | Leukemic  |
| AA485439  | CGI-146 protein                                                              | <i>PNAS-4</i>             | 51029        | 811058      | Leukemic  |
| AA718910  | MAD1 mitotic arrest deficienT like 1 (yeast)                                 | <i>MAD1L1</i>             | 8379         | 1292432     | Leukemic  |
| R16503    | Multiple cluster hits:106510 & 144669                                        | <i>LOC116236 &amp; 0</i>  | 116236 & 0   | 128668      | Leukemic  |
| H08423    | SET and MYND domain containing 2                                             | <i>SMYD2</i>              | 56950        | 45623       | Leukemic  |
| AA418095  | Multiple cluster hits:508021 & 516808                                        | <i>RCBTB1 &amp; PDE6D</i> | 55213 & 5147 | 767422      | Leukemic  |
| AI360738  | KIAA1036                                                                     | <i>KIAA1036</i>           | 22846        | 2011138     | Leukemic  |
| AA044579  | Kynurenine 3-monoxygenase (kynurenine 3-hydroxylase)                         | <i>KMO</i>                | 8564         | 486710      | Leukemic  |
| AA150060  | Multiple cluster hits:409081 & 534399                                        | <i>KMO &amp; OPN3</i>     | 8564 & 23596 | 504461      | Leukemic  |
| AA664237  | Synaptopodin                                                                 | <i>SYNPO</i>              | 11346        | 855610      | Leukemic  |
| AA424629  | Latent transforming growth factor beta binding protein 2                     | <i>LTBP2</i>              | 4053         | 767202      | Leukemic  |

|          |                                                                                                                                |                             |               |         |          |
|----------|--------------------------------------------------------------------------------------------------------------------------------|-----------------------------|---------------|---------|----------|
| AA465338 | KIAA0922 protein                                                                                                               | <i>KIAA0922</i>             | 23240         | 814062  |          |
| BX107484 | Hypothetical protein LOC284749                                                                                                 | <i>LOC284749</i>            | 284749        | 294381  | CD19     |
| W02963   | Fc receptor homolog expressed in B cells                                                                                       | <i>FREB</i>                 | 84824         | 291871  | CD19     |
| AA464602 | Sterile alpha motif domain containing 4                                                                                        | <i>SAMD4</i>                | 23034         | 812969  | CD19     |
| BX111769 | Calcium/calmodulin-dependent protein kinase (CaM kinase) II delta                                                              | <i>CAMK2D</i>               | 817           | 713271  | CD19     |
| AA406353 | Programmed cell death 6                                                                                                        | <i>PDCD6</i>                | 10016         | 753193  | CD19     |
| AA825491 | Interferon regulatory factor 4                                                                                                 | <i>IRF4</i>                 | 3662          | 1358229 | CD19     |
| N52267   | Adaptor-related protein complex 2, beta 1 subunit                                                                              | <i>AP2B1</i>                | 163           | 245853  | CD71/GPA |
| T68430   | Hypothetical protein FLJ10853                                                                                                  | <i>FLJ10853</i>             | 55246         | 83342   | CD71/GPA |
| R26176   | Signal transducer and activator of transcription 5B                                                                            | <i>STAT5B</i>               | 6777          | 132857  | CD71/GPA |
| AA918646 | KIAA0830 protein                                                                                                               | <i>KIAA0830</i>             | 23052         | 1534700 | CD71/GPA |
| AA460115 | Ornithine decarboxylase 1                                                                                                      | <i>ODC1</i>                 | 4953          | 796646  | CD71/GPA |
| AI015679 | Phosphoserine aminotransferase 1                                                                                               | <i>PSAT1</i>                | 29968         | 1636108 | Leukemic |
| T64216   | Nucleoredoxin                                                                                                                  | <i>NXN</i>                  | 64359         | 80226   | Leukemic |
| AA866113 | Amyloid beta (A4) precursor protein-binding, family B, member 2 (Fe65-like)                                                    | <i>APBB2</i>                | 323           | 1470333 | Leukemic |
| AA699926 | Syntrophin, alpha 1 (dystrophin-associated protein A1, 59kDa, acidic component)                                                | <i>SNTA1</i>                | 6640          | 435330  | Leukemic |
| AA857195 | Tumor suppressing subtransferable candidate 1                                                                                  | <i>TSSC1</i>                | 7260          | 1435003 | Leukemic |
| AI364374 | Serine threonine kinase 39 (STE20/SPS1 homolog, yeast)                                                                         | <i>STK39</i>                | 27347         | 2018084 | Leukemic |
| AA663910 | Golgi autoantigen, golgin subfamily a, 3                                                                                       | <i>GOLGA3</i>               | 2802          | 855684  | Leukemic |
| AA887320 | SH3 multiple domains 1                                                                                                         | <i>SH3MD1</i>               | 9644          | 1500815 | Leukemic |
| AA496984 | Angiomotin                                                                                                                     | <i>AMOT</i>                 | 154796        | 823647  | Leukemic |
| N42729   | Chromosome 14 open reading frame 37                                                                                            | <i>C14orf37</i>             | 145407        | 270921  | Leukemic |
| AA401304 | Pre-B cell leukemia transcription factor 1                                                                                     | <i>PBX1</i>                 | 5087          | 741880  | CD71/GPA |
| AA430546 | KIAA0056 protein                                                                                                               | <i>KIAA0056</i>             | 23310         | 770066  | Leukemic |
| AA701242 | Cordon-bleu homolog (mouse)                                                                                                    | <i>COBL</i>                 | 23242         | 434863  | Leukemic |
| BX118816 | Plexin B1                                                                                                                      | <i>PLXNB1</i>               | 5364          | 755952  | Leukemic |
| BX106842 | Androgen receptor (dihydrotestosterone receptor; testicular feminization; spinal and bulbar muscular atrophy; Kennedy disease) | <i>AR</i>                   | 367           | 2250839 | Leukemic |
| AI343711 | Aldehyde oxidase 1                                                                                                             | <i>AOX1</i>                 | 316           | 1917741 | Leukemic |
| AA452824 | Sema domain, transmembrane domain (TM), and cytoplasmic domain, (semaphorin) 6D                                                | <i>SEMA6D</i>               | 80031         | 788558  | Leukemic |
| AA025434 | Family with sequence similarity 3, member D                                                                                    | <i>FAM3D</i>                | 131177        | 365707  | Leukemic |
| AA436591 | C-mer proto-oncogene tyrosine kinase                                                                                           | <i>MERTK</i>                | 10461         | 753069  | Leukemic |
| AA629903 | Hypothetical protein LOC143458                                                                                                 | <i>LOC143458</i>            | 143458        | 884662  | Leukemic |
| AA464605 | Ankyrin repeat domain 15                                                                                                       | <i>ANKRD15</i>              | 23189         | 812975  | Leukemic |
| AA701545 | Ribonuclease, RNase A family, k6                                                                                               | <i>RNASE6</i>               | 6039          | 435858  |          |
| AA150254 | Placenta-specific 8                                                                                                            | <i>PLAC8</i>                | 51316         | 491644  |          |
| AA133536 | Hypothetical protein LOC147111                                                                                                 | <i>LOC147111</i>            | 147111        | 490718  |          |
| AA431967 | LATS, large tumor suppressor, homolog 2 (Drosophila)                                                                           | <i>LATS2</i>                | 26524         | 782193  |          |
| AA426306 | Guanine nucleotide binding protein (G protein), q polypeptide                                                                  | <i>GNAQ</i>                 | 2776          | 769022  |          |
| AA457182 | KIAA1068 protein                                                                                                               | <i>KIAA1068</i>             | 23386         | 838367  |          |
| AI681896 | Glucuronidase, beta                                                                                                            | <i>GUSB</i>                 | 2990          | 2273001 |          |
| BX101090 | Bone morphogenetic protein 2                                                                                                   | <i>BMP2</i>                 | 650           | 359610  |          |
| R23083   | Moesin                                                                                                                         | <i>MSN</i>                  | 4478          | 131362  |          |
| N53376   | Phosphoinositide-3-kinase, regulatory subunit 5, p101                                                                          | <i>PIK3R5</i>               | 23533         | 284004  |          |
| AA425513 | Solute carrier family 9 (sodium/hydrogen exchanger), isoform 3 regulator 1                                                     | <i>SLC9A3R1</i>             | 9368          | 773286  |          |
| CR744995 | Cytochrome B 245, beta polypeptide (chronic granulomatous disease)                                                             | <i>CYBB</i>                 | 1536          | 1942669 |          |
| AA598631 | Spermidine/spermine N1-acetyltransferase                                                                                       | <i>SAT</i>                  | 6303          | 897864  |          |
| AA454591 | Multiple cluster hits:33333 & 388613                                                                                           | <i>O &amp; NEO1</i>         | 388134 & 4756 | 811562  |          |
| AA504303 | Multiple cluster hits:435933 & 495960                                                                                          | <i>PHF10 &amp; ATP6AP2</i>  | 55274 & 10159 | 825076  |          |
| W04283   | Multiple cluster hits:132340 & 389724                                                                                          | <i>C6orf85 &amp; IFI44L</i> | 63027 & 10964 | 295939  |          |
| AA504431 | Phosphatidylinositol 3,4,5-trisphosphate-dependent RAC exchanger 1                                                             | <i>PREX1</i>                | 57580         | 825270  |          |

|          |                                                                                                                                                  |                              |               |         |
|----------|--------------------------------------------------------------------------------------------------------------------------------------------------|------------------------------|---------------|---------|
| AA059378 | Guanylate cyclase activator 1A (retina)                                                                                                          | <i>GUCA1A</i>                | 2978          | 381866  |
| H85272   | Rab9 effector p40                                                                                                                                | <i>RAB9P40</i>               | 10244         | 249606  |
| AA664004 | Tripeptidyl peptidase I                                                                                                                          | <i>CLN2</i>                  | 1200          | 855385  |
| AA488885 | Zinc finger protein 106 homolog (mouse)                                                                                                          | <i>SH3BP3</i>                | 64397         | 824875  |
| T59658   | Anthrax toxin receptor 2                                                                                                                         | <i>ANTXR2</i>                | 118429        | 76169   |
| AA159688 | Ecotropic viral integration site 2B                                                                                                              | <i>EVI2B</i>                 | 2124          | 593183  |
| BX110601 | Aldo-keto reductase family 1, member C2 (dihydrodiol dehydrogenase 2; bile acid binding protein; 3-alpha hydroxysteroid dehydrogenase, type III) | <i>AKRIC1</i>                | 1645          | 212620  |
| CR736732 | 6-phosphofructo-2-kinase/fructose-2,6-biphosphatase 2                                                                                            | <i>PFKFB2</i>                | 5208          | 325526  |
| T53169   | KIAA2002 protein                                                                                                                                 | <i>KIAA2002</i>              | 79834         | 68534   |
| A1948737 | V-ral simian leukemia viral oncogene homolog B (ras related; GTP binding protein)                                                                | <i>RALB</i>                  | 5899          | 2472305 |
| AA411323 | Interleukin 13 receptor, alpha 1                                                                                                                 | <i>IL13RA1</i>               | 3597          | 755037  |
| W52272   | GLI pathogenesis-related 1 (glioma)                                                                                                              | <i>GLIPR1</i>                | 11010         | 325365  |
| H97597   | HIV-1 rev binding protein 2                                                                                                                      | <i>HRB2</i>                  | 11103         | 260696  |
| BX098567 | Platelet/endothelial cell adhesion molecule (CD31 antigen)                                                                                       | <i>PECAM1</i>                | 5175          | 130541  |
| AA446021 | RNA binding motif protein 17                                                                                                                     | <i>RBM17</i>                 | 84991         | 781026  |
| AA463323 | Chromosome 6 open reading frame 111                                                                                                              | <i>C6orf111</i>              | 25957         | 796921  |
| AA286902 | Serine/threonine kinase 17a (apoptosis-inducing)                                                                                                 | <i>STK17A</i>                | 9263          | 701450  |
| AA479102 | Protein kinase C, beta 1                                                                                                                         | <i>PRKCB1</i>                | 5579          | 753923  |
| A1628353 | KIAA0882 protein                                                                                                                                 | <i>KIAA0882</i>              | 23158         | 2284924 |
| A1361583 | Potassium voltage-gated channel, subfamily F, member 1                                                                                           | <i>KCNF1</i>                 | 3754          | 2015269 |
| H09463   | Jumonji domain containing 1C                                                                                                                     | <i>JMJD1C</i>                | 221037        | 46286   |
| T96006   | Multiple cluster hits:159799 & 370781                                                                                                            | <i>THRAP2 &amp; KIAA0251</i> | 23389 & 23042 | 120897  |
| A1184710 | Toll-like receptor 6                                                                                                                             | <i>TLR6</i>                  | 10333         | 1734216 |
| R78328   | CDC2-related protein kinase 7                                                                                                                    | <i>CRK7</i>                  | 51755         | 145743  |
| R23318   | Suppressor of cytokine signaling 2                                                                                                               | <i>SOCS2</i>                 | 8835          | 131073  |
| AA866153 | Protein inhibitor of activated STAT, 1                                                                                                           | <i>PIAS1</i>                 | 8554          | 1469434 |
| AA453028 | Paired immunoglobulin-like type 2 receptor beta                                                                                                  | <i>PILRB</i>                 | 29990         | 788355  |
| W24806   | Myosin IB                                                                                                                                        | <i>MYO1B</i>                 | 4430          | 308231  |
| T77810   | RYK receptor-like tyrosine kinase                                                                                                                | <i>RYK</i>                   | 6259          | 108815  |
| BX098872 | Hypothetical protein LOC339290                                                                                                                   | <i>LOC339290</i>             | 339290        | 767347  |
| AA056375 | Hypothetical protein from clone 643                                                                                                              | <i>LOC57228</i>              | 57228         | 509458  |
| AA480983 | Formin binding protein 1                                                                                                                         | <i>FNBP1</i>                 | 23048         | 814620  |
| AA465494 | Acyl-CoA synthetase long-chain family member 5                                                                                                   | <i>ACSL5</i>                 | 51703         | 814053  |
| W55967   | MAP3K12 binding inhibitory protein 1                                                                                                             | <i>MBIP</i>                  | 51562         | 340555  |
| AA460074 | Protein kinase, cAMP-dependent, catalytic, beta                                                                                                  | <i>PRKACB</i>                | 5567          | 796442  |
| AA447661 | Sestrin 1                                                                                                                                        | <i>SESN1</i>                 | 27244         | 813584  |
| N25140   | Multiple cluster hits:506383 & 521240                                                                                                            | <i>0 &amp; LCHN</i>          | 0 & 57189     | 261492  |
| AA035450 | Inositol 1,4,5-triphosphate receptor, type 1                                                                                                     | <i>ITPR1</i>                 | 3708          | 471725  |
| N58609   | Chemokine orphan receptor 1                                                                                                                      | <i>CMKOR1</i>                | 57007         | 246786  |
| AA001874 | Solute carrier family 9 (sodium/hydrogen exchanger), isoform 9                                                                                   | <i>SLC9A9</i>                | 285195        | 428163  |
| AA417921 | Multiple cluster hits:85201 & 194694                                                                                                             | <i>CLECSF2 &amp; MAP3K6</i>  | 9976 & 9064   | 767405  |
| H11808   | C-type (calcium dependent, carbohydrate-recognition domain) lectin, superfamily member 2 (activation-induced)                                    | <i>CLECSF2</i>               | 9976          | 47481   |
| AA626777 | Muscle RAS oncogene homolog                                                                                                                      | <i>MRAS</i>                  | 22808         | 877772  |
| AA621342 | DKFZP564B167 protein                                                                                                                             | <i>DKFZP564B167</i>          | 25874         | 1048810 |
| A1000103 | Glutamate-ammonia ligase (glutamine synthase)                                                                                                    | <i>GLUL</i>                  | 2752          | 1609836 |
| AA131701 | Sperm autoantigenic protein 17                                                                                                                   | <i>SPA17</i>                 | 53340         | 503866  |
| H68845   | Peroxiredoxin 2                                                                                                                                  | <i>PRDX2</i>                 | 7001          | 212165  |
| W24873   | Fucosidase, alpha-L- 1, tissue                                                                                                                   | <i>FUCA1</i>                 | 2517          | 308437  |
| AA426027 | Sorting nexin 3                                                                                                                                  | <i>SNX3</i>                  | 8724          | 757225  |
| T60160   | GABA(A) receptor-associated protein like 1                                                                                                       | <i>GABARAPL1</i>             | 23710         | 81409   |

|          |                                                                                                        |                     |          |         |               |
|----------|--------------------------------------------------------------------------------------------------------|---------------------|----------|---------|---------------|
| AI337373 | PHD finger protein 19                                                                                  | <i>PHF19</i>        | 26147    | 2062453 |               |
| T97800   | Hypothetical protein LOC284940                                                                         | <i>SHANK3</i>       | 85358    | 121540  |               |
| AA156032 | SH3-domain binding protein 4                                                                           | <i>SH3BP4</i>       | 23677    | 590145  |               |
| AA704613 | Similar to lymphocyte antigen 6 complex, locus G5B; G5b protein; open reading frame 31                 | <i>LOC112476</i>    | 112476   | 450777  |               |
| AI369785 | Neural proliferation, differentiation and control, 1                                                   | <i>NPDC1</i>        | 56654    | 2017597 |               |
| AA442959 | 6-pyruvoyl-tetrahydropterin synthase/dimerization cofactor of hepatocyte nuclear factor 1 alpha (TCF1) | <i>PCBD</i>         | 5092     | 809421  |               |
| AA491213 | Splicing factor, arginine/serine-rich 9                                                                | <i>SFRS9</i>        | 8683     | 824041  |               |
| R64190   | Arginyl aminopeptidase (aminopeptidase B)                                                              | <i>RNPEP</i>        | 6051     | 139573  |               |
| AA292435 | SLIT ROBO Rho GTPase activating protein 2                                                              | <i>SRGAP2</i>       | 23380    | 714493  |               |
| AI985408 | Solute carrier family 27 (fatty acid transporter), member 2                                            | <i>SLC27A2</i>      | 11001    | 2496336 |               |
| AA428394 | HtrA serine peptidase 3                                                                                | <i>HTRA3</i>        | 94031    | 773558  |               |
| AA046939 | Multiple cluster hits:351680 & 516515                                                                  | <i>0 &amp; 0</i>    | 0 & 0    | 376866  |               |
| AI344518 | H2A histone family, member V                                                                           | <i>H2AFV</i>        | 94239    | 1917941 |               |
| AA708152 | Transmembrane emp24 protein transport domain containing 6                                              | <i>MGC23911</i>     | 146456   | 460798  |               |
| R26405   | CDNA FLJ14942 fis, A-PLACE1011185                                                                      | <i>0</i>            | 0        | 132250  |               |
| AI611956 | Immunoglobulin lambda-like polypeptide 1                                                               | <i>IGLL1</i>        | 3543     | 2245295 |               |
| AA664101 | Aldehyde dehydrogenase 1 family, member A1                                                             | <i>ALDH1A1</i>      | 216      | 855624  |               |
| BX089984 | TEA domain family member 4                                                                             | <i>TEAD4</i>        | 7004     | 346696  |               |
| AA452140 | Hypothetical protein MGC45428                                                                          | <i>MGC45428</i>     | 166614   | 787860  |               |
| T97547   | Heterogeneous nuclear ribonucleoprotein U (scaffold attachment factor A)                               | <i>HNRPU</i>        | 3192     | 121621  |               |
| AA430410 | Hypothetical protein LOC162073                                                                         | <i>LOC162073</i>    | 162073   | 769947  |               |
| AI018794 | KIAA1545 protein                                                                                       | <i>KIAA1545</i>     | 57666    | 1639072 |               |
| AI652019 | MAD2 mitotic arrest deficienT like 2 (yeast)                                                           | <i>MAD2L2</i>       | 10459    | 2306860 | CD34/CD19     |
| AI808234 | Zinc finger protein 177                                                                                | <i>ZNF177</i>       | 7730     | 2363207 | CD34/CD19     |
| N95435   | Putative G protein coupled receptor                                                                    | <i>GPR</i>          | 11245    | 309929  | CD34/CD19     |
| BX103225 | Multiple cluster hits:149156 & 547053                                                                  | <i>GLDC &amp; 0</i> | 2731 & 0 | 248261  | CD34/CD19     |
| AI015349 | Calcium regulated heat stable protein 1, 24kDa                                                         | <i>CARHSP1</i>      | 23589    | 1637328 | CD34/CD19     |
| BX118964 | Regulating synaptic membrane exocytosis 3                                                              | <i>RIMS3</i>        | 9783     | 175846  | CD34/CD19     |
| BX090424 | Coronin, actin binding protein, 2B                                                                     | <i>CORO2B</i>       | 10391    | 303199  | CD34/CD19     |
| CR743281 | CHK1 checkpoint homolog (S. pombe)                                                                     | <i>CHEK1</i>        | 1111     | 246524  | CD34/Immature |
| R78607   | CDK2-associated protein 1                                                                              | <i>CDK2AP1</i>      | 8099     | 144932  | CD34/Immature |
| AI017283 | Angiomotin like 1                                                                                      | <i>AMOTL1</i>       | 154810   | 1638584 | CD34/Immature |
| AI653017 | Cyclin-dependent kinase 2                                                                              | <i>CDK2</i>         | 1017     | 2308346 | CD34/Immature |
| T65786   | Splicing factor, arginine/serine-rich 1 (splicing factor 2, alternate splicing factor)                 | <i>SFRS1</i>        | 6426     | 80399   | CD34/Immature |
| N26486   | Hypothetical protein FLJ12760                                                                          | <i>FLJ12760</i>     | 339175   | 266218  | CD34/Immature |
| AA190583 | Ubiquitin specific protease 13 (isopeptidase T 3)                                                      | <i>USP13</i>        | 8975     | 613126  | CD34/Immature |
| T63981   | Ring finger protein (C3HC4 type) 159                                                                   | <i>RNF159</i>       | 84333    | 79763   | CD34/Immature |
| T72234   | Alanine-glyoxylate aminotransferase 2                                                                  | <i>AGXT2</i>        | 64902    | 85836   | CD34/Immature |
| T71965   | ATP synthase mitochondrial F1 complex assembly factor 1                                                | <i>ATPAF1</i>       | 64756    | 85384   | CD34/Immature |
| AA455565 | Transmembrane protein 9                                                                                | <i>TMEM9</i>        | 252839   | 813488  | CD34/Immature |
| N21334   | Abl interactor 2                                                                                       | <i>ABI2</i>         | 10152    | 265102  | CD34/Immature |
| AA701963 | Aldo-keto reductase family 1, member B1 (aldose reductase)                                             | <i>AKR1B1</i>       | 231      | 435948  | CD34/Immature |
| AA699677 | Hexokinase 1                                                                                           | <i>HK1</i>          | 3098     | 446888  | CD34/Immature |
| H09923   | Poly (ADP-ribose) polymerase family, member 1                                                          | <i>PARP1</i>        | 142      | 46248   | CD34/Immature |
| R88930   | Multiple cluster hits:459927 & 504790                                                                  | <i>PTMA &amp; 0</i> | 5757 & 0 | 195419  | CD34/Immature |
| AA456008 | ALL1-fused gene from chromosome 1q                                                                     | <i>AF1Q</i>         | 10962    | 812105  | CD34/Immature |
| H16256   | Hypothetical protein FLJ20397                                                                          | <i>FLJ20397</i>     | 54919    | 47647   | CD34/Immature |
| AA885609 | Microtubule-associated protein 1A                                                                      | <i>MAP1A</i>        | 4130     | 1499940 | CD34/Immature |
| AA449133 | CTP synthase                                                                                           | <i>CTPS</i>         | 1503     | 785389  | CD34/Immature |
| N31952   | Methylcrotonoyl-Coenzyme A carboxylase 2 (beta)                                                        | <i>MCCC2</i>        | 64087    | 259374  | CD34/Immature |

|          |                                                                                                         |               |       |         |               |
|----------|---------------------------------------------------------------------------------------------------------|---------------|-------|---------|---------------|
| H47080   | ATP synthase, H <sup>+</sup> transporting, mitochondrial F0 complex, subunit c (subunit 9)<br>isoform 3 | <i>ATP5G3</i> | 518   | 193106  | CD34/Immature |
| AI359066 | Small nuclear ribonucleoprotein polypeptide E                                                           | <i>SNRPE</i>  | 6635  | 2013064 | CD34/Immature |
| R18985   | Cleavage and polyadenylation specific factor 6, 68kDa                                                   | <i>CPSF6</i>  | 11052 | 33690   | CD34/Immature |

---
