# Supplementary material
Source: PubMed Central journal article supplement (PMC1323166)
Supplement: pnas_0506637102_24.pdf [file pnas_0506637102_24.pdf]

**Table 25. Gene order according to the hierarchical clustering of the top-200 genes of *IGH@/MYC* and the normal bone marrows and purified hematopoietic cells**

| Accession no. | Gene name                                                                  | Gene symbol                 | Entrez gene | Reporter ID | Signature     |
|---------------|----------------------------------------------------------------------------|-----------------------------|-------------|-------------|---------------|
| AI364523      | Full length insert cDNA clone ZD81C11                                      | <i>0</i>                    | 0           | 2018158     |               |
| AW025960      | Mediator of RNA polymerase II transcription, subunit 12 homolog (yeast)    | <i>MED12</i>                | 9968        | 2516484     |               |
| AA487215      | Myosin, light polypeptide kinase                                           | <i>MYLK</i>                 | 4638        | 841308      |               |
| AA045664      | Glycosyltransferase 28 domain containing 1                                 | <i>GLT28D1</i>              | 55849       | 489213      |               |
| R10823        | Breast carcinoma amplified sequence 3                                      | <i>BCAS3</i>                | 54828       | 129020      |               |
| AA134808      | Integrin beta 1 binding protein (melusin) 2                                | <i>ITGB1BP2</i>             | 26548       | 502462      |               |
| AA292074      | Ubiquitin-conjugating enzyme E2L 6                                         | <i>UBE2L6</i>               | 9246        | 725395      |               |
| AA216535      | Sterol-C5-desaturase (ERG3 delta-5-desaturase homolog, fungal)-like        | <i>SC5DL</i>                | 6309        | 649743      |               |
| AA399320      | Lysosomal-associated protein transmembrane 4 alpha                         | <i>LAPTM4A</i>              | 9741        | 726684      |               |
| W90704        | B lymphoma Mo-MLV insertion region (mouse)                                 | <i>BMI1</i>                 | 648         | 418004      |               |
| AA872348      | Ras homolog gene family, member F (in filopodia)                           | <i>RHOF</i>                 | 54509       | 1472664     |               |
| BX094795      | Transcribed locus                                                          | <i>0</i>                    | 0           | 795397      |               |
| AI246316      | GTPase, IMAP family member 2                                               | <i>GIMAP2</i>               | 26157       | 1967131     |               |
| AA417921      | Multiple cluster hits:85201 & 194694                                       | <i>CLECSF2 &amp; MAP3K6</i> | 9976 & 9064 | 767405      |               |
| R73647        | Multiple cluster hits:343873 & 521419                                      | <i>0 &amp; FLJ32642</i>     | 0 & 137492  | 143115      |               |
| R40574        | Multiple cluster hits:147218 & 202001                                      | <i>0 &amp; KIAA1012</i>     | 0 & 22878   | 28654       |               |
| AA059378      | Guanylate cyclase activator 1A (retina)                                    | <i>GUCA1A</i>               | 2978        | 381866      |               |
| AI014740      | Der1-like domain family, member 2                                          | <i>DERL2</i>                | 51009       | 1598739     |               |
| AI955688      | HMT1 hnRNP methyltransferase-like 1 ( <i>S. cerevisiae</i> )               | <i>HRMT1L1</i>              | 3275        | 2509615     |               |
| AA988615      | Major histocompatibility complex, class I, F                               | <i>HLA-F</i>                | 3134        | 1604703     |               |
| AA489785      | Nuclear receptor coactivator 1                                             | <i>NCOA1</i>                | 8648        | 839552      |               |
| AA453275      | Integral membrane protein 2B                                               | <i>ITM2B</i>                | 9445        | 795375      |               |
| AA411380      | Ecotropic viral integration site 2A                                        | <i>EVI2A</i>                | 2123        | 754582      |               |
| AA424369      | KIAA1049 protein                                                           | <i>KIAA1049</i>             | 22980       | 767078      |               |
| AA633658      | Amyloid beta (A4) precursor protein (protease nexin-II, Alzheimer disease) | <i>APP</i>                  | 351         | 856575      |               |
| AI342950      | Lamina-associated polypeptide 1B                                           | <i>LAP1B</i>                | 26092       | 1910657     |               |
| AI688320      | AP2 associated kinase 1                                                    | <i>AAK1</i>                 | 22848       | 2326267     |               |
| R53479        | Hypothetical protein MGC10485                                              | <i>MGC10485</i>             | 112936      | 40155       |               |
| AA155694      | Potassium voltage-gated channel, KQT like subfamily, member 1              | <i>KCNQ1OT1</i>             | 10984       | 592241      |               |
| AA626721      | Zinc finger, CSL domain containing 2                                       | <i>ZCSSL2</i>               | 285381      | 745174      |               |
| AA486388      | G1 to S phase transition 1                                                 | <i>GSPT1</i>                | 2935        | 842825      |               |
| AA149987      | Protease, serine, 16 (thymus)                                              | <i>PRSS16</i>               | 10279       | 566597      |               |
| T82365        | EGF-like repeats and discoidin I-like domains 3                            | <i>EDIL3</i>                | 10085       | 80643       |               |
| T64262        | Chemokine (C-C motif) ligand 13                                            | <i>CCL13</i>                | 6357        | 80146       |               |
| AA428524      | Homo sapiens, clone IMAGE:4337652, mRNA                                    | <i>0</i>                    | 0           | 773204      |               |
| R82300        | Adenosylmethionine decarboxylase 1                                         | <i>AMD1</i>                 | 262         | 149013      |               |
| AW025698      | Latent transforming growth factor beta binding protein 1                   | <i>LTBP1</i>                | 4052        | 2516260     | CD71/GPA      |
| AA400362      | Transcription factor Dp-2 (E2F dimerization partner 2)                     | <i>TFDP2</i>                | 7029        | 742806      | CD71/GPA      |
| R16418        | Fraser syndrome 1                                                          | <i>FRAS1</i>                | 80144       | 129320      | CD71/GPA      |
| W32608        | Transportin 1                                                              | <i>TNPO1</i>                | 3842        | 321492      | CD71/GPA      |
| AA488324      | BUB1 budding uninhibited by benzimidazoles 1 homolog beta (yeast)          | <i>BUB1B</i>                | 701         | 842968      | CD71/GPA      |
| AI611326      | Solute carrier family 25, member 13 (citrin)                               | <i>SLC25A13</i>             | 10165       | 2242727     |               |
| AA071368      | Myelin protein zero-like 1                                                 | <i>MPZL1</i>                | 9019        | 530093      |               |
| AA456878      | V-myb myeloblastosis viral oncogene homolog (avian)-like 2                 | <i>MYBL2</i>                | 4605        | 815526      | CD34/Immature |
| AA129134      | Solute carrier family 29 (nucleoside transporters), member 1               | <i>SLC29A1</i>              | 2030        | 586650      | CD34/Immature |
| AA404286      | Peptidylprolyl isomerase F (cyclophilin F)                                 | <i>PPIF</i>                 | 10105       | 758343      | CD34/Immature |
| R43734        | Laminin, alpha 4                                                           | <i>LAMA4</i>                | 3910        | 32609       | CD34/Immature |

|          |                                                                                                                                                        |                               |                 |         |               |
|----------|--------------------------------------------------------------------------------------------------------------------------------------------------------|-------------------------------|-----------------|---------|---------------|
| AW050510 | Pyrroline-5-carboxylate reductase 1                                                                                                                    | <i>PYCRI</i>                  | 5831            | 2557762 | CD34/Immature |
| N47717   | Fatty acid binding protein 5 (psoriasis-associated)                                                                                                    | <i>FABP5</i>                  | 2171            | 281039  | CD34/Immature |
| AI651009 | Mitogen-activated protein kinase 12                                                                                                                    | <i>MAPK12</i>                 | 6300            | 2304048 | CD34/Immature |
| H81935   | Hypothetical protein FLJ32702                                                                                                                          | <i>FLJ32702</i>               | 123775          | 239937  | Leukemic      |
| W77808   | Heterogeneous nuclear ribonucleoprotein A/B                                                                                                            | <i>HNRPAB</i>                 | 3182            | 345833  | Leukemic      |
| AW006596 | Citrate synthase                                                                                                                                       | <i>CS</i>                     | 1431            | 2488760 | Leukemic      |
| BX108870 | DKFZP564M082 protein                                                                                                                                   | <i>DKFZP564M082</i>           | 25906           | 771317  | Leukemic      |
| AA988524 | Death-associated protein 6                                                                                                                             | <i>DAXX</i>                   | 1616            | 1602516 | Leukemic      |
| AA775271 | Chromosome 20 open reading frame 20                                                                                                                    | <i>C20orf20</i>               | 55257           | 878607  | Leukemic      |
| AA433827 | Est1p-like protein B                                                                                                                                   | <i>EST1B</i>                  | 23381           | 770709  | Leukemic      |
| AA292283 | PHD finger protein 2                                                                                                                                   | <i>PHF2</i>                   | 5253            | 725841  | Leukemic      |
| H17627   | Hypothetical protein FLJ20232                                                                                                                          | <i>FLJ20232</i>               | 54471           | 50693   | Leukemic      |
| AI969131 | Enolase 2 (gamma, neuronal)                                                                                                                            | <i>ENO2</i>                   | 2026            | 2545711 | Leukemic      |
| BX104631 | GTP binding protein 4                                                                                                                                  | <i>GTPBP4</i>                 | 23560           | 230235  | Leukemic      |
| N56726   | Multiple cluster hits:23754 & 399984                                                                                                                   | <i>0 &amp; FLJ12519</i>       | 0 & 84128       | 258175  | Leukemic      |
| R27615   | Protein kinase, DNA-activated, catalytic polypeptide                                                                                                   | <i>PRKDC</i>                  | 5591            | 133637  | Leukemic      |
| BX099342 | Aspartoacylase (aminocyclase) 3                                                                                                                        | <i>ACY3</i>                   | 91703           | 129128  | CD34/Immature |
| AA039640 | WEE1 homolog (S. pombe)                                                                                                                                | <i>WEE1</i>                   | 7465            | 376316  | Leukemic      |
| BX089627 | CDNA FLJ14942 fis, A-PLACE1011185                                                                                                                      | <i>CDNA FLJ14942</i>          | 0               | 811032  | Leukemic      |
| AA448187 | KIAA1212                                                                                                                                               | <i>KIAA1212</i>               | 55704           | 782806  | Leukemic      |
| AA459069 | Multiple cluster hits:524506 & 549298                                                                                                                  | <i>SLC39A5 &amp; FLJ34236</i> | 283375 & 283373 | 810803  | Leukemic      |
| AA644129 | Fanconi anemia, complementation group A                                                                                                                | <i>FANCA</i>                  | 2175            | 845419  | Leukemic      |
| AA620516 | DEAH (Asp-Glu-Ala-His) box polypeptide 33                                                                                                              | <i>DHX33</i>                  | 56919           | 951298  | Leukemic      |
| AA418408 | Multiple cluster hits:282387 & 525529                                                                                                                  | <i>POLR3G &amp; KCNMB4</i>    | 10622 & 27345   | 767273  | Leukemic      |
| AI346246 | RNA binding motif protein 9                                                                                                                            | <i>RBM9</i>                   | 23543           | 1926364 | Leukemic      |
| H85704   | Frizzled homolog 3 (Drosophila)                                                                                                                        | <i>FZD3</i>                   | 7976            | 219961  | Leukemic      |
| AA447599 | Cytoplasmic linker associated protein 2                                                                                                                | <i>CLASP2</i>                 | 23122           | 782700  | Leukemic      |
| AA975029 | PAI-1 mRNA-binding protein                                                                                                                             | <i>PAI-RBP1</i>               | 26135           | 1560991 | Leukemic      |
| AA460171 | Transcribed locus                                                                                                                                      | <i>0</i>                      | 0               | 795901  | Leukemic      |
| T70342   | Transcribed locus, weakly similar to NP_055301.1 neuronal thread protein AD7c-NTP [Homo sapiens]                                                       | <i>0</i>                      | 0               | 67066   | Leukemic      |
| W87541   | Calcyclin binding protein                                                                                                                              | <i>CACYBP</i>                 | 27101           | 416981  | Leukemic      |
| AA872402 | Eukaryotic translation initiation factor 4B                                                                                                            | <i>EIF4B</i>                  | 1975            | 1472753 | Leukemic      |
| AI291437 | Tetratricopeptide repeat domain 4                                                                                                                      | <i>TTC4</i>                   | 7268            | 1894412 | Leukemic      |
| AA983905 | WD repeat domain 4                                                                                                                                     | <i>WDR4</i>                   | 10785           | 1581541 | Leukemic      |
| AA931892 | Exosome component 7                                                                                                                                    | <i>EXOSC7</i>                 | 23016           | 1570436 | Leukemic      |
| AA431199 | Chromosome 10 open reading frame 70                                                                                                                    | <i>C10orf70</i>               | 55847           | 782164  | Leukemic      |
| BX099505 | Heparan sulfate (glucosamine) 3-O-sulfotransferase 4                                                                                                   | <i>HS3ST4</i>                 | 9951            | 1417985 | Leukemic      |
| AA486524 | Mitochondrial ribosomal protein S27                                                                                                                    | <i>MRPS27</i>                 | 23107           | 843133  | Leukemic      |
| AA923514 | Anaphase promoting complex subunit 1                                                                                                                   | <i>ANAPC1</i>                 | 64682           | 1534603 | Leukemic      |
| AA678021 | Small nuclear ribonucleoprotein polypeptide E                                                                                                          | <i>SNRPE</i>                  | 6635            | 431803  | Leukemic      |
| R40127   | RAN binding protein 1                                                                                                                                  | <i>RANBP1</i>                 | 5902            | 30093   | Leukemic      |
| AA626076 | Pantothenate kinase 1                                                                                                                                  | <i>PANK1</i>                  | 53354           | 1055460 | Leukemic      |
| BX090366 | Transcribed locus, moderately similar to XP_357414.1 similar to Small nuclear ribonucleoprotein F (snRNP-F) (Sm protein F) (Sm-F) (SmF) [Mus musculus] | <i>Transcribed locus</i>      | 0               | 451664  | Leukemic      |
| T60508   | Full length insert cDNA YH77E09                                                                                                                        | <i>cDNA YH77E09</i>           | 0               | 78064   | Leukemic      |
| AA598486 | SUMO-1 activating enzyme subunit 1                                                                                                                     | <i>SAE1</i>                   | 10055           | 898121  | Leukemic      |
| AA455111 | Heterogeneous nuclear ribonucleoprotein C (C1/C2)                                                                                                      | <i>HNRPC</i>                  | 3183            | 809835  | Leukemic      |
| AI301329 | Aldo-keto reductase family 1, member B10 (aldose reductase)                                                                                            | <i>AKR1B10</i>                | 57016           | 1899496 | Leukemic      |
| AA485132 | Bromodomain adjacent to zinc finger domain, 1B                                                                                                         | <i>BAZ1B</i>                  | 9031            | 815683  | Leukemic      |
| AA598504 | Ras-GTPase-activating protein SH3-domain-binding protein                                                                                               | <i>G3BP</i>                   | 10146           | 898145  | Leukemic      |
| AA465459 | DEAD (Asp-Glu-Ala-Asp) box polypeptide 21                                                                                                              | <i>DDX21</i>                  | 9188            | 814117  | Leukemic      |

|          |                                                                                                       |                                  |                |         |               |
|----------|-------------------------------------------------------------------------------------------------------|----------------------------------|----------------|---------|---------------|
| N90109   | Multiple cluster hits:79110 & 118127                                                                  | <i>NCL &amp; ACTC</i>            | 4691 & 70      | 302933  | Leukemic      |
| AW007634 | Histidyl-tRNA synthetase 2                                                                            | <i>HARS2</i>                     | 92675          | 2511570 | Leukemic      |
| N94588   | CASP8 and FADD-like apoptosis regulator                                                               | <i>CFLAR</i>                     | 8837           | 309776  | CD34/Immature |
| W87741   | V-myc myelocytomatosis viral oncogene homolog (avian)                                                 | <i>MYC</i>                       | 4609           | 417226  | CD34/Immature |
| W86133   | V-myb myeloblastosis viral oncogene homolog (avian)                                                   | <i>MYB</i>                       | 4602           | 416280  | CD34/Immature |
| BX119416 | Hypothetical protein MGC40397                                                                         | <i>MGC40397</i>                  | 121053         | 788507  | CD34/Immature |
| AA668301 | Ribosomal protein S16                                                                                 | <i>RPS16</i>                     | 6217           | 853151  | CD34/Immature |
| AA496376 | Solute carrier family 25 (mitochondrial carrier; adenine nucleotide translocator), member 6           | <i>SLC25A6</i>                   | 293            | 755855  | CD34/Immature |
| AA133534 | Retinol dehydrogenase 13 (all-trans and 9-cis)                                                        | <i>RDH13</i>                     | 112724         | 490714  | CD34/Immature |
| AA700090 | Mitochondrial ribosomal protein L50                                                                   | <i>MRPL50</i>                    | 54534          | 435415  | CD34/Immature |
| T71834   | Mitochondrial ribosomal protein L30                                                                   | <i>MRPL30</i>                    | 51263          | 85318   | CD34/Immature |
| AA449654 | Formin binding protein 1                                                                              | <i>FNBP1</i>                     | 23048          | 785907  | CD34/Immature |
| R11047   | Multiple cluster hits:344165 & 493309                                                                 | <i>UBE2H &amp; KIAA0020</i>      | 7328 & 9933    | 129227  | CD34/Immature |
| R13596   | Hypothetical gene LOC128439                                                                           | <i>LOC128439</i>                 | 128439         | 26736   | CD34/Immature |
| H79778   | Histone deacetylase 3                                                                                 | <i>HDAC3</i>                     | 8841           | 239877  | CD34/Immature |
| AA190583 | Ubiquitin specific protease 13 (isopeptidase T 3)                                                     | <i>USP13</i>                     | 8975           | 613126  | CD34/Immature |
| AA496809 | SWI/SNF related, matrix associated, actin dependent regulator of chromatin, subfamily a, member 1     | <i>SMARCA1</i>                   | 6594           | 897667  | CD34/Immature |
| AA186790 | Notchless gene homolog (Drosophila)                                                                   | <i>FLJ10458</i>                  | 54475          | 625399  | CD34/Immature |
| H71218   | Processing of precursor 7, ribonuclease P subunit (S. cerevisiae)                                     | <i>POP7</i>                      | 10248          | 214577  | CD34/Immature |
| AA676471 | Eukaryotic translation initiation factor 3, subunit 9 eta, 116kDa                                     | <i>EIF3S9</i>                    | 8662           | 882515  | CD34/Immature |
| N28521   | Eukaryotic translation initiation factor 5A                                                           | <i>EIF5A</i>                     | 1984           | 263892  | CD34/Immature |
| AA676316 | Polymerase (RNA) I polypeptide A, 194kDa                                                              | <i>POLR1A</i>                    | 25885          | 430436  | CD34/Immature |
| BX117129 | Ts translation elongation factor, mitochondrial                                                       | <i>TSEFM</i>                     | 10102          | 324618  | CD34/Immature |
| AA504814 | Hypothetical protein HSPC111                                                                          | <i>HSPC111</i>                   | 51491          | 825695  | CD34/Immature |
| W76508   | DnaJ (Hsp40) homolog, subfamily C, member 11                                                          | <i>DNAJC11</i>                   | 55735          | 345711  | CD34/Immature |
| CR741476 | Multiple cluster hits:335293 & 405987                                                                 | <i>DKFZP564C186 &amp; SAMD11</i> | 26155 & 148398 | 773462  | CD34/Immature |
| AI675611 | Mitofusin 1                                                                                           | <i>MFN1</i>                      | 55669          | 2314027 | CD34/Immature |
| BX114583 | FLJ44796 protein                                                                                      | <i>FLJ44796</i>                  | 401209         | 194987  | CD34/Immature |
| R92186   | Misato                                                                                                | <i>FLJ10504</i>                  | 55154          | 195817  | CD34/Immature |
| AA447959 | Multiple cluster hits:162397 & 516036                                                                 | <i>FLJ10871 &amp; TRIM54</i>     | 55756 & 57159  | 760282  | CD34/Immature |
| AA433818 | Nucleolin                                                                                             | <i>NCL</i>                       | 4691           | 770704  | CD34/Immature |
| AA448261 | High-mobility group AT hook 1                                                                         | <i>HMGA1</i>                     | 3159           | 782811  | CD34/Immature |
| AI334223 | Transcribed locus                                                                                     | <i>0</i>                         | 0              | 1932062 | CD34/Immature |
| AI360334 | Carbamoyl-phosphate synthetase 2, aspartate transcarbamylase, and dihydroorotase                      | <i>CAD</i>                       | 790            | 2019214 | CD34/Immature |
| AA620477 | Serine hydroxymethyltransferase 2 (mitochondrial)                                                     | <i>SHMT2</i>                     | 6472           | 951117  | CD34/Immature |
| AA291513 | B cell CLL/lymphoma 7B                                                                                | <i>BCL7B</i>                     | 9275           | 724831  | CD34/Immature |
| AA775831 | Nuclear transport factor 2                                                                            | <i>NUTF2</i>                     | 10204          | 878506  | CD34/Immature |
| AA205665 | SET translocation (myeloid leukemia-associated)                                                       | <i>SET</i>                       | 6418           | 646801  | CD34/Immature |
| AA459148 | Multiple cluster hits:91579 & 266331                                                                  | <i>IMP4 &amp; FREB</i>           | 92856 & 84824  | 814428  | CD34/Immature |
| N45236   | LOC441015                                                                                             | <i>KIAA0114</i>                  | 57291          | 283173  | CD34/Immature |
| AA489602 | TNF receptor-associated protein 1                                                                     | <i>TRAP1</i>                     | 10131          | 897570  | CD34/Immature |
| AA953249 | Complement factor H                                                                                   | <i>CFH</i>                       | 3075           | 1592021 | CD34/Immature |
| AA486936 | Tyrosyl-tRNA synthetase                                                                               | <i>YARS</i>                      | 8565           | 841070  | CD34/Immature |
| AA932521 | FK506 binding protein 4, 59kDa                                                                        | <i>FKBP4</i>                     | 2288           | 1570663 | CD34/Immature |
| AA465723 | Multiple cluster hits:17883 & 432562                                                                  | <i>PPM1G &amp; ITSN2</i>         | 5496 & 50618   | 814989  | CD34/Immature |
| AA132083 | Atherin                                                                                               | <i>LOC90378</i>                  | 90378          | 504201  | CD34/Immature |
| AA599175 | Transcribed locus, strongly similar to XP_525693.1 similar to DNA-binding protein B [Pan troglodytes] | <i>0</i>                         | 0              | 949932  | CD34/Immature |
| AA099169 | Phosphofructokinase, muscle                                                                           | <i>PFKM</i>                      | 5213           | 489626  | CD34/Immature |
| N31952   | Methylcrotonoyl-Coenzyme A carboxylase 2 (beta)                                                       | <i>MCCC2</i>                     | 64087          | 259374  | CD34/Immature |

|          |                                                                                                                                    |                 |        |         |                 |
|----------|------------------------------------------------------------------------------------------------------------------------------------|-----------------|--------|---------|-----------------|
| AA043133 | Solute carrier family 16 (monocarboxylic acid transporters), member 1                                                              | <i>SLC16A1</i>  | 6566   | 486175  | CD34/Immature   |
| AA427807 | Deleted in lymphocytic leukemia, 1                                                                                                 | <i>DLEU1</i>    | 10301  | 773383  | CD34/Immature   |
| BX114173 | Eukaryotic translation elongation factor 1 epsilon 1                                                                               | <i>EEF1E1</i>   | 9521   | 306921  | CD34/Immature   |
| H71092   | Calmodulin binding transcription activator 1                                                                                       | <i>CAMTA1</i>   | 23261  | 211800  | CD34/Immature   |
| AA779727 | A disintegrin and metalloproteinase domain 19 (meltrin beta)                                                                       | <i>ADAM19</i>   | 8728   | 1034494 |                 |
| W86504   | Pellino homolog 1 (Drosophila)                                                                                                     | <i>PELL1</i>    | 57162  | 416676  |                 |
| R07827   | IBR domain containing 2                                                                                                            | <i>IBRDC2</i>   | 255488 | 126934  |                 |
| R72689   | Myosin, heavy polypeptide 11, smooth muscle                                                                                        | <i>MYH11</i>    | 4629   | 156324  |                 |
| AA857101 | Homeo box B7                                                                                                                       | <i>HOXB7</i>    | 3217   | 1434905 |                 |
| W96189   | Src homology 3 domain-containing guanine nucleotide exchange factor                                                                | <i>SGEF</i>     | 26084  | 361659  |                 |
| AI982528 | Immunoglobulin superfamily, member 4                                                                                               | <i>IGSF4</i>    | 23705  | 2508140 |                 |
| AA490501 | UV radiation resistance associated gene                                                                                            | <i>UVRAG</i>    | 7405   | 823901  | CD19            |
| AA935689 | KIAA0746 protein                                                                                                                   | <i>KIAA0746</i> | 23231  | 1556991 | CD19            |
| AA283106 | Prepronociceptin                                                                                                                   | <i>PNOC</i>     | 5368   | 713263  | CD19            |
| W02963   | Fc receptor homolog expressed in B cells                                                                                           | <i>FREB</i>     | 84824  | 291871  | CD19            |
| BX118507 | Oxysterol binding protein-like 10                                                                                                  | <i>OSBPL10</i>  | 114884 | 151597  | CD19            |
| AA258944 | V-rel reticuloendotheliosis viral oncogene homolog B, nuclear factor of kappa light polypeptide gene enhancer in B cells 3 (avian) | <i>RELB</i>     | 5971   | 687054  | CD19            |
| R38669   | Rho-related BTB domain containing 2                                                                                                | <i>RHOBTB2</i>  | 23221  | 23333   | CD19            |
| N92712   | Chromosome 11 open reading frame 24                                                                                                | <i>C11orf24</i> | 53838  | 306446  | CD19            |
| AA418994 | Integrin, alpha 3 (antigen CD49C, alpha 3 subunit of VLA-3 receptor)                                                               | <i>ITGA3</i>    | 3675   | 755402  |                 |
| H99203   | Ubiquitin specific protease 7 (herpes virus-associated)                                                                            | <i>USP7</i>     | 7874   | 261829  |                 |
| AA465338 | KIAA0922 protein                                                                                                                   | <i>KIAA0922</i> | 23240  | 814062  |                 |
| AA148641 | Meis1, myeloid ecotropic viral integration site 1 homolog 2 (mouse)                                                                | <i>MEIS2</i>    | 4212   | 503083  |                 |
| AI040379 | Glycosylphosphatidylinositol specific phospholipase D1                                                                             | <i>GPLD1</i>    | 2822   | 1656488 |                 |
| AA909354 | Synovial sarcoma, X breakpoint 2 interacting protein                                                                               | <i>SSX2IP</i>   | 117178 | 1505784 |                 |
| AA905925 | PRKC, apoptosis, WT1, regulator                                                                                                    | <i>PAWR</i>     | 5074   | 1505405 |                 |
| AI732405 | Hypothetical protein MGC24039                                                                                                      | <i>MGC24039</i> | 160518 | 511218  |                 |
| AA169121 | Metastasis associated 1 family, member 3                                                                                           | <i>MTA3</i>     | 57504  | 594556  |                 |
| N80376   | Hypothetical protein FLJ23451                                                                                                      | <i>FLJ23451</i> | 79823  | 292531  |                 |
| AA486607 | Nedd4 binding protein 3                                                                                                            | <i>N4BP3</i>    | 23138  | 841176  | Leukemic        |
| W47100   | Ubiquitin-conjugating enzyme E2G 1 (UBC7 homolog, C. elegans)                                                                      | <i>UBE2G1</i>   | 7326   | 324653  | Leukemic        |
| AA699926 | Syntrophin, alpha 1 (dystrophin-associated protein A1, 59kDa, acidic component)                                                    | <i>SNTA1</i>    | 6640   | 435330  | Leukemic        |
| AA704945 | Chromosome 13 open reading frame 21                                                                                                | <i>C13orf21</i> | 387923 | 461403  | Leukemic        |
| AA278473 | Calcium binding protein 39-like                                                                                                    | <i>CAB39L</i>   | 81617  | 703943  | Leukemic        |
| AA810225 | G protein-coupled receptor 30                                                                                                      | <i>GPR30</i>    | 2852   | 1367900 | Leukemic        |
| AI243521 | PR domain containing 15                                                                                                            | <i>PRDM15</i>   | 63977  | 1853490 | Leukemic        |
| T96924   | Chromosome 8 open reading frame 13                                                                                                 | <i>C8orf13</i>  | 83648  | 121136  | Leukemic        |
| W32303   | RAB6A, member RAS oncogene family                                                                                                  | <i>RAB6A</i>    | 5870   | 321470  | Leukemic        |
| H09757   | Leucine zipper, putative tumor suppressor 1                                                                                        | <i>LZTS1</i>    | 11178  | 46561   | Leukemic        |
| AA029597 | Bone morphogenetic protein 7 (osteogenic protein 1)                                                                                | <i>BMP7</i>     | 655    | 366887  | Leukemic        |
| N66104   | Kinesin family member 5C                                                                                                           | <i>KIF5C</i>    | 3800   | 278430  | Lymphoid/mature |
| T66833   | PTPRF interacting protein, binding protein 2 (liprin beta 2)                                                                       | <i>PPFIBP2</i>  | 8495   | 66336   | Lymphoid/mature |
| BX090803 | Solute carrier family 25 (mitochondrial carrier; phosphate carrier), member 23                                                     | <i>SLC25A23</i> | 79085  | 2074766 | Lymphoid/mature |
| BX107638 | Homo sapiens, clone IMAGE:5259272, mRNA                                                                                            | <i>0</i>        | 0      | 824995  | Lymphoid/mature |
| AA598652 | Sialyltransferase 1 (beta-galactoside alpha-2,6-sialyltransferase)                                                                 | <i>SIAT1</i>    | 6480   | 897906  | Lymphoid/mature |
| AA431848 | SON DNA binding protein                                                                                                            | <i>SON</i>      | 6651   | 773618  | Lymphoid/mature |
| AA677794 | BTB and CNC homology 1, basic leucine zipper transcription factor 2                                                                | <i>BACH2</i>    | 60468  | 431734  | Lymphoid/mature |
| AA894927 | Asparagine synthetase                                                                                                              | <i>ASNS</i>     | 440    | 1493527 | Lymphoid/mature |
| AI968431 | Hypothetical protein FLJ13910                                                                                                      | <i>FLJ13910</i> | 64795  | 2514601 | Lymphoid/mature |
| H78244   | Transmembrane 4 superfamily member 4                                                                                               | <i>TM4SF4</i>   | 7104   | 234559  | Lymphoid/mature |

|          |                                                   |               |       |         |                 |
|----------|---------------------------------------------------|---------------|-------|---------|-----------------|
| BX117756 | SET domain, bifurcated 1                          | <i>SETDB1</i> | 9869  | 25755   | Lymphoid/mature |
| W02632   | PI-3-kinase-related kinase SMG-1                  | <i>SMG1</i>   | 23049 | 296166  |                 |
| AA994297 | Zinc finger and BTB domain containing 2           | <i>ZBTB2</i>  | 57621 | 1631238 |                 |
| T80931   | NFS1 nitrogen fixation 1 ( <i>S. cerevisiae</i> ) | <i>NFS1</i>   | 9054  | 109307  |                 |

---
