# Supplementary material
Source: PubMed Central journal article supplement (PMC1323166)
Supplement: pnas_0506637102_25.pdf [file pnas_0506637102_25.pdf]

**Table 26. Gene order according to the hierarchical clustering of the top-200 genes of *ETV6/RUNX1* and the normal bone marrows and purified hematopoietic cells**

| Accession | Gene name                                                                                      | Gene symbol              | Entrez gene   | Reporter ID | Signature |
|-----------|------------------------------------------------------------------------------------------------|--------------------------|---------------|-------------|-----------|
| AI628353  | KIAA0882 protein                                                                               | <i>KIAA0882</i>          | 23158         | 2284924     |           |
| AA708152  | Transmembrane emp24 protein transport domain containing 6                                      | <i>MGC23911</i>          | 146456        | 460798      | Leukemic  |
| BX090758  | Telomeric repeat binding factor 2                                                              | <i>TERF2</i>             | 7014          | 205335      | Leukemic  |
| R67704    | Neuritin 1                                                                                     | <i>NRN1</i>              | 51299         | 140197      | Leukemic  |
| AA704833  | Angiopoietin-like 2                                                                            | <i>ANGPTL2</i>           | 23452         | 453195      | Leukemic  |
| R78776    | Protein tyrosine phosphatase, receptor type, K                                                 | <i>PTPRK</i>             | 5796          | 146123      |           |
| R06438    | Myosin, light polypeptide kinase                                                               | <i>MYLK</i>              | 4638          | 126341      |           |
| AA968896  | Midkine (neurite growth-promoting factor 2)                                                    | <i>MDK</i>               | 4192          | 1574594     | Leukemic  |
| R83610    | SMAD, mothers against DPP homolog 1 (Drosophila)                                               | <i>SMAD1</i>             | 4086          | 187614      | Leukemic  |
| AA490494  | Tumor necrosis factor receptor superfamily, member 21                                          | <i>TNFRSF21</i>          | 27242         | 823902      | Leukemic  |
| BX111856  | Phytanoyl-CoA hydroxylase (Refsum disease)                                                     | <i>PHYH</i>              | 5264          | 293104      | Leukemic  |
| AA045057  | Syndecan 2 (heparan sulfate proteoglycan 1, cell surface-associated, fibroglycan)              | <i>SDC2</i>              | 6383          | 488873      | Leukemic  |
| AA999901  | Guanine nucleotide binding protein (G protein), gamma 11                                       | <i>GNG11</i>             | 2791          | 1636447     | Leukemic  |
| AA453028  | Paired immunoglobulin-like type 2 receptor beta                                                | <i>PILRB</i>             | 29990         | 788355      | Leukemic  |
| AA496796  | FERM, RhoGEF (ARHGEF) and pleckstrin domain protein 1 (chondrocyte-derived)                    | <i>FARP1</i>             | 10160         | 897656      | Leukemic  |
| H59805    | IGF-II mRNA-binding protein 1                                                                  | <i>IMP-1</i>             | 10642         | 208078      | Leukemic  |
| BX094146  | Small EDRK-rich factor 2                                                                       | <i>SERF2</i>             | 10169         | 795427      | Leukemic  |
| AI985214  | Tissue factor pathway inhibitor (lipoprotein-associated coagulation inhibitor)                 | <i>TFPI</i>              | 7035          | 2495781     |           |
| BX104789  | Carboxypeptidase X (M14 family)                                                                | <i>CPXM</i>              | 56265         | 898044      |           |
| AA394198  | Protease, serine, 2 (trypsin 2)                                                                | <i>PRSS2</i>             | 5645          | 725709      |           |
| AI308916  | Protease, serine, 3 (mesotrypsin)                                                              | <i>PRSS3</i>             | 5646          | 1913366     |           |
| W87741    | V-myc myelocytomatosis viral oncogene homolog (avian)                                          | <i>MYC</i>               | 4609          | 417226      |           |
| H95959    | Secreted protein, acidic, cysteine-rich (osteonectin)                                          | <i>SPARC</i>             | 6678          | 250654      |           |
| N24824    | V-kit Hardy-Zuckerman 4 feline sarcoma viral oncogene homolog                                  | <i>KIT</i>               | 3815          | 269806      |           |
| AA437212  | Adaptor-related protein complex 1, sigma 2 subunit                                             | <i>AP1S2</i>             | 8905          | 757428      |           |
| AA490503  | LDL receptor adaptor protein                                                                   | <i>ARH</i>               | 26119         | 823909      |           |
| AA102454  | Calpain 2, (m/II) large subunit                                                                | <i>CAPN2</i>             | 824           | 549728      |           |
| N67007    | Multiple cluster hits:268326 & 371021                                                          | <i>OCIL &amp; LAPTM5</i> | 29121 & 7805  | 295868      |           |
| AI302421  | Lectin-like NK cell receptor                                                                   | <i>OCIL</i>              | 29121         | 1901749     |           |
| BX116983  | CD1C antigen, c polypeptide                                                                    | <i>CD1C</i>              | 911           | 428103      |           |
| AA452725  | Nucleobindin 1                                                                                 | <i>NUCB1</i>             | 4924          | 788472      |           |
| AI245605  | D-aspartate oxidase                                                                            | <i>DDO</i>               | 8528          | 1870049     |           |
| AA608572  | Pyrophosphatase (inorganic)                                                                    | <i>PP</i>                | 5464          | 950700      |           |
| AA151486  | Phosphoribosyl pyrophosphate synthetase 2                                                      | <i>PRPS2</i>             | 5634          | 503097      |           |
| BX107680  | ATP-binding cassette, suB family A (ABC1), member 9                                            | <i>ABCA9</i>             | 10350         | 299918      |           |
| AA700604  | Similar to Sorbitol dehydrogenase (L-itol 2-dehydrogenase)                                     | <i>0</i>                 | 116166        | 433350      |           |
| T95423    | Multiple cluster hits:507452 & 515130                                                          | <i>XPO4 &amp; VANGL1</i> | 64328 & 81839 | 120749      |           |
| AA292283  | PHD finger protein 2                                                                           | <i>PHF2</i>              | 5253          | 725841      |           |
| R12473    | Adenosine kinase                                                                               | <i>ADK</i>               | 132           | 128243      |           |
| AA670419  | Chromosome 22 open reading frame 9                                                             | <i>C22orf9</i>           | 23313         | 878809      |           |
| AI808234  | Zinc finger protein 177                                                                        | <i>ZNF177</i>            | 7730          | 2363207     |           |
| AA680132  | Sphingomyelin phosphodiesterase 2, neutral membrane (neutral sphingomyelinase)                 | <i>SMPD2</i>             | 6610          | 433170      |           |
| AA664210  | Protein kinase (cAMP-dependent, catalytic) inhibitor gamma                                     | <i>PKIG</i>              | 11142         | 855557      |           |
| R00595    | UDP-N-acetyl-alpha-D-galactosamine:polypeptide N-acetylgalactosaminyltransferase 2 (GalNAc-T2) | <i>GALNT2</i>            | 2590          | 123441      |           |
| AA677572  | PET112-like (yeast)                                                                            | <i>PET112L</i>           | 5188          | 455263      |           |

|          |                                                                                               |                              |               |         |
|----------|-----------------------------------------------------------------------------------------------|------------------------------|---------------|---------|
| AA429946 | Dehydrogenase/reductase (SDR family) member 4                                                 | <i>DHRS4</i>                 | 10901         | 781295  |
| AA703387 | Methylmalonic aciduria (cobalamin deficiency) type B                                          | <i>MMAB</i>                  | 326625        | 450050  |
| AI000935 | N-acetyltransferase-like protein                                                              | <i>FLJ10774</i>              | 55226         | 1613058 |
| AA421850 | Hypothetical protein MGC4308                                                                  | <i>MGC4308</i>               | 84319         | 754588  |
| AA496512 | Non-metastatic cells 2, protein (NM23B) expressed in                                          | <i>NME2</i>                  | 4831          | 755750  |
| AA422058 | Multiple cluster hits:42957 & 463456                                                          | <i>METTL1 &amp; NME2</i>     | 4234 & 4831   | 755239  |
| AA045399 | Hypothetical protein LOC162073                                                                | <i>LOC162073</i>             | 162073        | 487831  |
| AI871665 | Acetyl-Coenzyme A acetyltransferase 1 (acetoacetyl Coenzyme A thiolase)                       | <i>ACAT1</i>                 | 38            | 2292807 |
| AA489478 | Mitochondrial ribosomal protein L33                                                           | <i>MRPL33</i>                | 9553          | 897448  |
| AA459811 | Brain protein 44-like                                                                         | <i>BRP44L</i>                | 51660         | 795582  |
| N62366   | Hypothetical protein LOC339344                                                                | <i>LOC339344</i>             | 339344        | 290536  |
| AA287218 | Glycoprotein M6B                                                                              | <i>GPM6B</i>                 | 2824          | 713660  |
| AA025276 | Catenin (cadherin-associated protein), delta 1                                                | <i>CTNND1</i>                | 1500          | 364921  |
| AA043117 | Chromosome 9 open reading frame 9                                                             | <i>C9orf9</i>                | 11092         | 486717  |
| AA486239 | Filamin B, beta (actin binding protein 278)                                                   | <i>FLNB</i>                  | 2317          | 840818  |
| T81140   | Coatmer protein complex, subunit alpha                                                        | <i>COPA</i>                  | 1314          | 109153  |
| R78514   | Splicing factor 3b, subunit 5, 10kDa                                                          | <i>SF3B5</i>                 | 83443         | 144926  |
| T98497   | Phosphoglycerate dehydrogenase like 1                                                         | <i>PHGDHL1</i>               | 337867        | 122150  |
| AA776718 | Hypothetical protein BC009732                                                                 | <i>LOC133308</i>             | 133308        | 1292847 |
| R67222   | Chromosome 6 open reading frame 192                                                           | <i>C6orf192</i>              | 116843        | 140852  |
| AA487359 | Dishevelled associated activator of morphogenesis 1                                           | <i>DAAMI</i>                 | 23002         | 841475  |
| AA401853 | Proteasome (prosome, macropain) 26S subunit, non-ATPase, 9                                    | <i>PSMD9</i>                 | 5715          | 758662  |
| BX090430 | Signal peptide, CUB domain, EGF-like 2                                                        | <i>SCUBE2</i>                | 57758         | 346321  |
| AA453774 | Regulator of G protein signalling 16                                                          | <i>RGS16</i>                 | 6004          | 813707  |
| AA918646 | KIAA0830 protein                                                                              | <i>KIAA0830</i>              | 23052         | 1534700 |
| AA663941 | LOC387882 hypothetical protein                                                                | <i>LOC387882</i>             | 387882        | 855707  |
| BX100743 | Multiple cluster hits:198161 & 549160                                                         | <i>PLA2G4B &amp; SPTBN5</i>  | 8681 & 51332  | 343699  |
| AW074953 | Chromosome 21 open reading frame 2                                                            | <i>C21orf2</i>               | 755           | 2572207 |
| N49669   | Hypothetical protein FLJ40629                                                                 | <i>FLJ40629</i>              | 150468        | 243887  |
| BX113672 | Similar to BMP2 inducible kinase                                                              | <i>0</i>                     | 388957        | 243524  |
| R65792   | Enoyl Coenzyme A hydratase domain containing 1                                                | <i>ECHDC1</i>                | 55862         | 140100  |
| AA863116 | Hypothetical LOC403340                                                                        | <i>MGC70870</i>              | 403340        | 1455602 |
| AA417761 | Protein tyrosine phosphatase-like (proline instead of catalytic arginine), member b           | <i>PTPLB</i>                 | 201562        | 746245  |
| AA489080 | Likely ortholog of mouse nin one binding protein                                              | <i>NOBIP</i>                 | 28987         | 824799  |
| AI652765 | Zinc finger, FYVE domain containing 9                                                         | <i>ZFYVE9</i>                | 9372          | 2310274 |
| AA428893 | Protein tyrosine phosphatase, non-receptor type 2                                             | <i>PTPN2</i>                 | 5771          | 773567  |
| AA496886 | Multiple cluster hits:369232 & 477425                                                         | <i>EPB41L5 &amp; SLC12A8</i> | 57669 & 84561 | 897593  |
| N92712   | Chromosome 11 open reading frame 24                                                           | <i>C11orf24</i>              | 53838         | 306446  |
| AA970972 | SMAD, mothers against DPP homolog 3 (Drosophila)                                              | <i>SMAD3</i>                 | 4088          | 1575263 |
| AA872348 | Ras homolog gene family, member F (in filopodia)                                              | <i>RHOF</i>                  | 54509         | 1472664 |
| AA758257 | Activating signal cointegrator 1 complex subunit 1                                            | <i>ASCC1</i>                 | 51008         | 396857  |
| AA489301 | Cartilage associated protein                                                                  | <i>CRTAP</i>                 | 10491         | 842842  |
| AI362062 | Neuro-oncological ventral antigen 1                                                           | <i>NOVA1</i>                 | 4857          | 2015354 |
| AA447746 | DNA-damage-inducible transcript 4                                                             | <i>DDIT4</i>                 | 54541         | 813645  |
| CR736732 | 6-phosphofructo-2-kinase/fructose-2,6-biphosphatase 2                                         | <i>PFKFB2</i>                | 5208          | 325526  |
| AI362933 | Death-associated protein kinase 2                                                             | <i>DAPK2</i>                 | 23604         | 2018423 |
| BX100679 | FYN binding protein (FYB 120/130)                                                             | <i>FYB</i>                   | 2533          | 293325  |
| AA131530 | A kinase (PRKA) anchor protein 14                                                             | <i>AKAP14</i>                | 158798        | 503725  |
| R33401   | SAM domain, SH3 domain and nuclear localisation signals, 1                                    | <i>SAMSNI</i>                | 64092         | 136169  |
| CR748825 | Tumor necrosis factor receptor superfamily, member 10c, decoy without an intracellular domain | <i>TNFRSF10C</i>             | 8794          | 2108257 |

|          |                                                                                              |                                 |               |         |             |
|----------|----------------------------------------------------------------------------------------------|---------------------------------|---------------|---------|-------------|
| BX103609 | Multiple cluster hits:77091 & 196169                                                         | <i>DNASE1L1 &amp; LOC285944</i> | 1774 & 285944 | 2108031 |             |
| AA412053 | CD9 antigen (p24)                                                                            | <i>CD9</i>                      | 928           | 727251  |             |
| AA410288 | Rho guanine nucleotide exchange factor (GEF) 12                                              | <i>ARHGEF12</i>                 | 23365         | 754450  |             |
| W32777   | Transducin-like enhancer of split 3 (E(sp1) homolog, Drosophila)                             | <i>TLE3</i>                     | 7090          | 321574  |             |
| AW006385 | Potassium voltage-gated channel, KQT like subfamily, member 1                                | <i>KCNQ10T1</i>                 | 10984         | 2506534 |             |
| N51740   | Ectonucleotide pyrophosphatase/phosphodiesterase 4 (putative function)                       | <i>ENPP4</i>                    | 22875         | 281737  |             |
| T63461   | RNA binding motif, single stranded interacting protein 1                                     | <i>RBMS1</i>                    | 5937          | 80030   |             |
| N25897   | BCL2-associated athanogene 4                                                                 | <i>BAG4</i>                     | 9530          | 258454  |             |
| AI668897 | Protein tyrosine phosphatase, non-receptor type 18 (brain-derived)                           | <i>PTPN18</i>                   | 26469         | 2313483 |             |
| AA983765 | Coronin, actin binding protein, 2A                                                           | <i>CORO2A</i>                   | 7464          | 1580874 |             |
| AA782314 | Hypothetical protein MGC35440                                                                | <i>LOC147991</i>                | 147991        | 857574  |             |
| W24429   | PeanuT like 1 (Drosophila)                                                                   | <i>PNUTL1</i>                   | 5413          | 308041  |             |
| AI732703 | Fc fragment of IgG, receptor, transporter, alpha                                             | <i>FCGRT</i>                    | 2217          | 770394  |             |
| W69953   | Allograft inflammatory factor 1                                                              | <i>AIF1</i>                     | 199           | 343867  |             |
| AA024866 | Hypothetical protein FLJ32731                                                                | <i>FLJ32731</i>                 | 138050        | 365177  |             |
| AA938623 | 1-acylglycerol-3-phosphate O-acyltransferase 2 (lysophosphatidic acid acyltransferase, beta) | <i>AGPAT2</i>                   | 10555         | 1574058 |             |
| H98981   | Myeloid-associated differentiation marker                                                    | <i>MYADM</i>                    | 91663         | 261444  | Mature/CD15 |
| H18864   | Notch homolog 1, translocation-associated (Drosophila)                                       | <i>NOTCH1</i>                   | 4851          | 51275   | Mature/CD15 |
| AA490863 | NIMA (never in mitosis gene a)-related kinase 6                                              | <i>NEK6</i>                     | 10783         | 824150  | Mature/CD15 |
| AI492471 | Abhydrolase domain containing 3                                                              | <i>ABHD3</i>                    | 171586        | 2131779 | Mature/CD15 |
| AA149197 | WD repeat and FYVE domain containing 3                                                       | <i>WDFY3</i>                    | 23001         | 504575  | Mature/CD15 |
| AA292215 | Zinc finger and BTB domain containing 34                                                     | <i>ZBTB34</i>                   | 403341        | 725745  | Mature/CD15 |
| T53169   | KIAA2002 protein                                                                             | <i>KIAA2002</i>                 | 79834         | 68534   | Mature/CD15 |
| AA479102 | Protein kinase C, beta 1                                                                     | <i>PRKCB1</i>                   | 5579          | 753923  | Mature/CD15 |
| AA703075 | Pyruvate dehydrogenase kinase, isoenzyme 1                                                   | <i>PDK1</i>                     | 5163          | 436761  | Mature/CD15 |
| BX114269 | Chromodomain helicase DNA binding protein 2                                                  | <i>CHD2</i>                     | 1106          | 137211  | Mature/CD15 |
| BX093966 | Mitogen-activated protein kinase kinase kinase 10                                            | <i>MAP3K10</i>                  | 4294          | 122178  | Mature/CD15 |
| AA256132 | Interleukin 1 receptor accessory protein                                                     | <i>IL1RAP</i>                   | 3556          | 681917  | Mature/CD15 |
| H23443   | TAFAl protein                                                                                | <i>TAFAl</i>                    | 407738        | 51993   | Mature/CD15 |
| H09449   | Spondin 1, extracellular matrix protein                                                      | <i>SPON1</i>                    | 10418         | 46173   | Mature/CD15 |
| H17037   | Similar to CG4502-PA                                                                         | <i>0</i>                        | 134111        | 50582   | Mature/CD15 |
| BX090399 | Chromobox homolog 5 (HP1 alpha homolog, Drosophila)                                          | <i>CBX5</i>                     | 23468         | 452483  | Mature/CD15 |
| AI206454 | Acyl-CoA synthetase long-chain family member 3                                               | <i>ACSL3</i>                    | 2181          | 1758590 | Mature/CD15 |
| BX102083 | Multiple cluster hits:475970 & 548668                                                        | <i>OXSRI &amp; 0</i>            | 9943 & 0      | 198690  | Mature/CD15 |
| AA148734 | Ankyrin repeat domain 29                                                                     | <i>ANKRD29</i>                  | 147463        | 504761  | Mature/CD15 |
| AA125911 | PDZ and LIM domain 7 (enigma)                                                                | <i>PDLIM7</i>                   | 9260          | 502682  | Mature/CD15 |
| H08292   | Sidekick homolog 1 (chicken)                                                                 | <i>SDK1</i>                     | 221935        | 45391   | Leukemic    |
| AA053474 | Hypothetical protein FLJ14166                                                                | <i>FLJ14166</i>                 | 79616         | 509988  | Leukemic    |
| W30988   | Multiple cluster hits:9613 & 549764                                                          | <i>ANGPTL4 &amp; 0</i>          | 51129 & 0     | 310356  | Leukemic    |
| H17035   | Zinc finger, DHHC domain containing 3                                                        | <i>ZDHHC3</i>                   | 51304         | 50581   | Leukemic    |
| R25089   | DnaJ (Hsp40) homolog, subfamily A, member 1                                                  | <i>DNAJAI</i>                   | 3301          | 35318   | Leukemic    |
| N47522   | FBI4 protein                                                                                 | <i>FBI4</i>                     | 404201        | 280843  | Leukemic    |
| AA487510 | Mindbomb homolog 1 (Drosophila)                                                              | <i>MIB1</i>                     | 57534         | 839060  | Leukemic    |
| AA454079 | Sestrin 2                                                                                    | <i>SESN2</i>                    | 83667         | 788232  | Leukemic    |
| R92544   | Multiple cluster hits:59093 & 536592                                                         | <i>CACNB2 &amp; 0</i>           | 783 & 0       | 196348  | Leukemic    |
| AI349935 | Myosin X                                                                                     | <i>MYO10</i>                    | 4651          | 2052032 | Leukemic    |
| AI356028 | G protein-coupled receptor, family C, group 5, member B                                      | <i>GPRC5B</i>                   | 51704         | 2016775 | Leukemic    |
| AA460143 | Glucosamine-6-phosphate deaminase 1                                                          | <i>GNPDA1</i>                   | 10007         | 795882  |             |
| T51359   | G protein-coupled receptor kinase 5                                                          | <i>GRK5</i>                     | 2869          | 70120   |             |
| AA454756 | Hypothetical protein LOC112868                                                               | <i>LOC112868</i>                | 112868        | 809789  |             |

|          |                                                                                                          |                           |              |         |               |
|----------|----------------------------------------------------------------------------------------------------------|---------------------------|--------------|---------|---------------|
| AI971009 | Platelet activating factor acetylhydrolase 2, 40kDa                                                      | <i>PAFAH2</i>             | 5051         | 2488470 |               |
| AA701938 | Epsin 2                                                                                                  | <i>EPN2</i>               | 22905        | 435920  |               |
| AA917731 | RAB3A interacting protein (rabin3)                                                                       | <i>RAB3IP</i>             | 117177       | 1527297 |               |
| W31540   | KIAA1450 protein                                                                                         | <i>KIAA1450</i>           | 57600        | 320564  |               |
| AA432323 | WAS protein family, member 2                                                                             | <i>WASF2</i>              | 10163        | 781459  |               |
| H21039   | Chromosome 14 open reading frame 132                                                                     | <i>C14orf132</i>          | 56967        | 51344   |               |
| W24873   | Fucosidase, alpha-L- 1, tissue                                                                           | <i>FUCA1</i>              | 2517         | 308437  |               |
| R02269   | D4, zinc and double PHD fingers, family 3                                                                | <i>DPF3</i>               | 8110         | 124530  |               |
| H10008   | 5-hydroxytryptamine (serotonin) receptor 7 (adenylate cyclase-coupled)                                   | <i>HTR7</i>               | 3363         | 46611   | Leukemic      |
| AA133167 | KIAA1644 protein                                                                                         | <i>KIAA1644</i>           | 85352        | 490755  | Leukemic      |
| AA456101 | Phosphoinositide-3-kinase, class 3                                                                       | <i>PIK3C3</i>             | 5289         | 813536  | Leukemic      |
| AA015977 | Hydroxysteroid dehydrogenase like 1                                                                      | <i>LOC83693</i>           | 83693        | 360547  | Leukemic      |
| R05810   | Transcribed locus, moderately similar to NP_055301.1 neuronal thread protein AD7c-NTP [Homo sapiens]     | <i>0</i>                  | 0            | 125311  | Leukemic      |
| R02010   | Chromosome 10 open reading frame 26                                                                      | <i>C10orf26</i>           | 54838        | 124242  | Leukemic      |
| N20407   | Coagulation factor II (thrombin) receptor                                                                | <i>F2R</i>                | 2149         | 264692  | Leukemic      |
| R08679   | Abhydrolase domain containing 6                                                                          | <i>ABHD6</i>              | 57406        | 127447  | Leukemic      |
| AA418251 | Multiple cluster hits:14968 & 372541                                                                     | <i>PLAG1 &amp; KBTBD2</i> | 5324 & 25948 | 767638  | Leukemic      |
| AI936324 | Tyrosine kinase, non-receptor, 1                                                                         | <i>TNK1</i>               | 8711         | 2460159 | Leukemic      |
| AI950935 | Tumor protein p53 binding protein, 1                                                                     | <i>TP53BP1</i>            | 7158         | 2548134 | Leukemic      |
| N23340   | Hypothetical protein LOC152485                                                                           | <i>LOC152485</i>          | 152485       | 267186  | Leukemic      |
| AA431716 | Rho GTPase activating protein 17                                                                         | <i>ARHGAP17</i>           | 55114        | 782246  | Leukemic      |
| AA626264 | FCH and double SH3 domains 2                                                                             | <i>FCHSD2</i>             | 9873         | 745559  | Leukemic      |
| AA935533 | E2F transcription factor 6                                                                               | <i>E2F6</i>               | 1876         | 1557277 | Leukemic      |
| AA600190 | Nucleoporin 205kDa                                                                                       | <i>NUP205</i>             | 23165        | 950369  | Leukemic      |
| AI246570 | Chromosome 21 open reading frame 18                                                                      | <i>C21orf18</i>           | 54093        | 1903067 | Leukemic      |
| N66008   | Tumor suppressor candidate 3                                                                             | <i>TUSC3</i>              | 7991         | 293859  | Leukemic      |
| AA255695 | Solute carrier family 12 (sodium/potassium/chloride transporters), member 2                              | <i>SLC12A2</i>            | 6558         | 685801  | Leukemic      |
| AI351769 | Netrin G1                                                                                                | <i>NTNG1</i>              | 22854        | 1947054 | Leukemic      |
| AA705374 | Organic solute transporter alpha                                                                         | <i>OSTalpha</i>           | 200931       | 462116  | Leukemic      |
| AA775239 | Transmembrane 4 superfamily member tetraspan NET 5                                                       | <i>NET5</i>               | 10867        | 878572  | Leukemic      |
| W52208   | Coactosin-like 1 (Dictyostelium)                                                                         | <i>COTL1</i>              | 23406        | 325370  | Leukemic      |
| BX096730 | Transgelin 3                                                                                             | <i>TAGLN3</i>             | 29114        | 325160  | Leukemic      |
| AA701976 | Inositol 1,4,5-triphosphate receptor, type 3                                                             | <i>ITPR3</i>              | 3710         | 435953  | Leukemic      |
| AA496930 | Reversion-inducing-cysteine-rich protein with kazal motifs                                               | <i>RECK</i>               | 8434         | 897518  | Leukemic      |
| AA504232 | High-mobility group 20A                                                                                  | <i>HMG20A</i>             | 10363        | 825036  | Leukemic      |
| AI015577 | Homolog of yeast INO80                                                                                   | <i>INO80</i>              | 54617        | 1636837 | Leukemic      |
| AA035450 | Inositol 1,4,5-triphosphate receptor, type 1                                                             | <i>ITPR1</i>              | 3708         | 471725  | Leukemic      |
| N49774   | KIAA1671 protein                                                                                         | <i>KIAA1671</i>           | 85379        | 282404  | Leukemic      |
| N59295   | Chromosome 12 open reading frame 2                                                                       | <i>C12orf2</i>            | 11228        | 289794  | Leukemic      |
| AW084720 | Complement component 1, s subcomponent                                                                   | <i>C1S</i>                | 716          | 2569884 | Leukemic      |
| AA496253 | Activating transcription factor 5                                                                        | <i>ATF5</i>               | 22809        | 814158  | Leukemic      |
| H08899   | Isopentenyl-diphosphate delta isomerase                                                                  | <i>IDII</i>               | 3422         | 44975   | Leukemic      |
| N30348   | Fms-related tyrosine kinase 1 (vascular endothelial growth factor/vascular permeability factor receptor) | <i>FLT1</i>               | 2321         | 258101  | Leukemic      |
| BX100923 | Cadherin 4, type 1, R-cadherin (retinal)                                                                 | <i>CDH4</i>               | 1002         | 32777   | Leukemic      |
| BX109808 | Calneuron 1                                                                                              | <i>CALN1</i>              | 83698        | 27916   | Leukemic      |
| T97800   | Hypothetical protein LOC284940                                                                           | <i>SHANK3</i>             | 85358        | 121540  | Leukemic      |
| AA704802 | Neuroigin 2                                                                                              | <i>NLGN2</i>              | 57555        | 452466  | Leukemic      |
| AW057930 | Unc-13 homolog B (C. elegans)                                                                            | <i>UNC13B</i>             | 10497        | 2541460 | Leukemic      |
| AA775600 | Phosphatidylinositol-specific phospholipase C, X domain containing 1                                     | <i>PLCXD1</i>             | 55344        | 378433  | Cd34/immature |
| AA621510 | Zinc finger protein 219                                                                                  | <i>ZNF219</i>             | 51222        | 1055297 | Cd34/immature |

|          |                                                                       |                 |       |        |               |
|----------|-----------------------------------------------------------------------|-----------------|-------|--------|---------------|
| AA705153 | Hypothetical protein FLJ10357                                         | <i>FLJ10357</i> | 55701 | 461613 | Cd34/immature |
| T66109   | Core-binding factor, runt domain, alpha subunit 2; translocated to, 3 | <i>CBFA2T3</i>  | 863   | 21684  | Cd34/immature |
| AA001106 | Insulin receptor                                                      | <i>INSR</i>     | 3643  | 427812 | Cd34/immature |
| BX090473 | Major histocompatibility complex, class II, DM alpha                  | <i>HLA-DMA</i>  | 3108  | 183337 | Cd34/immature |
| AA443899 | Scavenger receptor class B, member 1                                  | <i>SCARB1</i>   | 949   | 756687 | Cd34/immature |

---
