# Supplementary material
Source: PubMed Central journal article supplement (PMC1323166)
Supplement: pnas_0506637102_26.pdf [file pnas_0506637102_26.pdf]

**Table 27. Gene order according to the hierarchical clustering of the top-200 genes of the hyperdiploid cases and the normal bone marrows and purified hematopoietic cells**

| Accession | Gene name                                                                                      | Gene symbol                | Entrez gene   | Reporter ID | Signature   |
|-----------|------------------------------------------------------------------------------------------------|----------------------------|---------------|-------------|-------------|
| H59000    | Nuclear factor (erythroid-derived 2), 45kDa                                                    | <i>NFE2</i>                | 4778          | 207794      | Mature/CD15 |
| W01926    | Membrane-spanning 4-domains, subfamily A, member 6A                                            | <i>MS4A6A</i>              | 64231         | 294535      | Mature/CD15 |
| W40257    | UDP-N-acetyl-alpha-D-galactosamine:polypeptide N-acetylgalactosaminyltransferase 3 (GalNAc-T3) | <i>GALNT3</i>              | 2591          | 328542      | Mature/CD15 |
| AA504303  | Multiple cluster hits:435933 & 495960                                                          | <i>PHF10 &amp; ATP6AP2</i> | 55274 & 10159 | 825076      | Mature/CD15 |
| H10010    | Ectonucleoside triphosphate diphosphohydrolase 1                                               | <i>ENTPD1</i>              | 953           | 46715       | Mature/CD15 |
| AA004975  | Development and differentiation enhancing factor 1                                             | <i>DDEF1</i>               | 50807         | 428936      | Mature/CD15 |
| R02333    | UBX domain containing 3                                                                        | <i>UBXD3</i>               | 127733        | 124239      | Mature/CD15 |
| N28844    | V-maf musculoaponeurotic fibrosarcoma oncogene homolog G (avian)                               | <i>MAFG</i>                | 4097          | 266037      | Mature/CD15 |
| AW029299  | Interleukin 17 receptor                                                                        | <i>IL17R</i>               | 23765         | 2543085     | Mature/CD15 |
| AW050573  | Transient receptor potential cation channel, subfamily M, member 2                             | <i>TRPM2</i>               | 7226          | 2558044     | Mature/CD15 |
| AI935172  | Oculocerebrorenal syndrome of Lowe                                                             | <i>OCRL</i>                | 4952          | 2464833     | Mature/CD15 |
| BX113710  | Multiple cluster hits:509651 & 550321                                                          | <i>FNTB &amp; O</i>        | 2342 & 0      | 213564      | Mature/CD15 |
| H98255    | Chromosome 10 open reading frame 46                                                            | <i>C10orf46</i>            | 143384        | 261274      | Mature/CD15 |
| AA064946  | Vacuolar protein sorting 26 (yeast)                                                            | <i>VPS26</i>               | 9559          | 529147      | Mature/CD15 |
| AA701368  | Carbonic anhydrase VB like                                                                     | <i>CA5BL</i>               | 340591        | 435510      | Mature/CD15 |
| BX104021  | Synuclein, alpha (non A4 component of amyloid precursor)                                       | <i>SNCA</i>                | 6622          | 418328      | Mature/CD15 |
| H71229    | 82-kD FMRP Interacting Protein                                                                 | <i>182-FIP</i>             | 57532         | 214604      | Mature/CD15 |
| BX102980  | Moesin                                                                                         | <i>MSN</i>                 | 4478          | 814265      | Mature/CD15 |
| R09581    | Adaptor-related protein complex 1, sigma 2 subunit                                             | <i>AP1S2</i>               | 8905          | 127665      | Mature/CD15 |
| AW008840  | Nephroblastoma overexpressed gene                                                              | <i>NOV</i>                 | 4856          | 2502789     | Mature/CD15 |
| N51740    | Ectonucleotide pyrophosphatase/phosphodiesterase 4 (putative function)                         | <i>ENPP4</i>               | 22875         | 281737      |             |
| AA782314  | Hypothetical protein MGC35440                                                                  | <i>LOC147991</i>           | 147991        | 857574      |             |
| AA670359  | Rho GTPase activating protein 24                                                               | <i>ARHGAP24</i>            | 83478         | 878417      |             |
| AI523637  | Protocadherin 9                                                                                | <i>PCDH9</i>               | 5101          | 2116531     |             |
| AA102454  | Calpain 2, (m/II) large subunit                                                                | <i>CAPN2</i>               | 824           | 549728      |             |
| AA521439  | Synaptotagmin-like 2                                                                           | <i>SYTL2</i>               | 54843         | 826194      |             |
| AI380391  | Family with sequence similarity 14, member A                                                   | <i>FAM14A</i>              | 83982         | 2107092     |             |
| AA464528  | Proteolipid protein 2 (colonic epithelium-enriched)                                            | <i>PLP2</i>                | 5355          | 810504      |             |
| AA455005  | Sorting nexin 9                                                                                | <i>SNX9</i>                | 51429         | 811937      |             |
| H23561    | Deltex homolog 1 (Drosophila)                                                                  | <i>DTX1</i>                | 1840          | 52120       |             |
| R74171    | Rap2 interacting protein x                                                                     | <i>RIPX</i>                | 22902         | 143310      |             |
| AA455521  | Multiple cluster hits:443072 & 445758                                                          | <i>0 &amp; E2F5</i>        | 401466 & 1875 | 809828      |             |
| AA703219  | Dedicator of cytokinesis 10                                                                    | <i>DOCK10</i>              | 55619         | 435992      |             |
| R78776    | Protein tyrosine phosphatase, receptor type, K                                                 | <i>PTPRK</i>               | 5796          | 146123      |             |
| AA885342  | Hypothetical protein FLJ10379                                                                  | <i>FLJ10379</i>            | 55133         | 1461767     |             |
| AA983573  | Elongation factor Tu GTP binding domain containing 1                                           | <i>EFTUD1</i>              | 79631         | 1559230     |             |
| AA482007  | Hypothetical protein FLJ10415                                                                  | <i>FLJ10415</i>            | 55139         | 746007      |             |
| AI025113  | Polymerase (DNA directed), mu                                                                  | <i>POLM</i>                | 27434         | 1631746     |             |
| AA045286  | G patch domain containing 1                                                                    | <i>GPATC1</i>              | 55094         | 487921      |             |
| AA278393  | Multiple cluster hits:145500 & 523529                                                          | <i>0 &amp; 0</i>           | 0 & 440608    | 712526      |             |
| N48804    | Forkhead box P1                                                                                | <i>FOXP1</i>               | 27086         | 279482      |             |
| AA918089  | Ras homolog gene family, member T2                                                             | <i>RHOT2</i>               | 89941         | 1536013     |             |
| AA481100  | Adaptor-related protein complex 4, beta 1 subunit                                              | <i>AP4B1</i>               | 10717         | 814662      |             |
| R20432    | Hypothetical protein MGC2752                                                                   | <i>MGC2752</i>             | 65996         | 32794       |             |
| N52162    | Protein kinase (cAMP-dependent, catalytic) inhibitor alpha                                     | <i>PKIA</i>                | 5569          | 284401      |             |
| AA482326  | Leucine zipper, down-regulated in cancer 1-like                                                | <i>LDOC1L</i>              | 84247         | 840884      |             |
| W93066    | K562 cell-derived leucine-zipper-like protein 1                                                | <i>KLP1</i>                | 57106         | 414992      |             |

|          |                                                                          |                             |                |         |          |
|----------|--------------------------------------------------------------------------|-----------------------------|----------------|---------|----------|
| AA670144 | Hypoxia-inducible protein 2                                              | <i>HIG2</i>                 | 29923          | 845658  |          |
| BX109505 | B7 gene                                                                  | <i>B7</i>                   | 10233          | 302632  |          |
| AA906438 | Hypothetical protein BC007772                                            | <i>LOC93109</i>             | 93109          | 1505998 |          |
| AA621510 | Zinc finger protein 219                                                  | <i>ZNF219</i>               | 51222          | 1055297 |          |
| AA705153 | Hypothetical protein FLJ10357                                            | <i>FLJ10357</i>             | 55701          | 461613  |          |
| BX111498 | WD repeat domain 35                                                      | <i>WDR35</i>                | 57539          | 287634  |          |
| N49204   | Acylphosphatase 2, muscle type                                           | <i>ACYP2</i>                | 98             | 280252  |          |
| AA598639 | KIAA1573 protein                                                         | <i>KIAA1573</i>             | 57685          | 897884  |          |
| AA182499 | IGF-II mRNA-binding protein 1                                            | <i>IMP-1</i>                | 10642          | 613237  |          |
| AA489238 | Multiple cluster hits:21388 & 460499                                     | <i>ZDHHC21 &amp; ATXN2L</i> | 340481 & 11273 | 825088  |          |
| AI678208 | Dynein 2 light intermediate chain                                        | <i>D2LIC</i>                | 51626          | 2316138 |          |
| AA166695 | Tumor necrosis factor (ligand) superfamily, member 13b                   | <i>TNFSF13B</i>             | 10673          | 593690  |          |
| AA169699 | Hypothetical protein FLJ11171                                            | <i>FLJ11171</i>             | 55783          | 609910  |          |
| AI401528 | Hypothetical protein MGC34646                                            | <i>MGC34646</i>             | 157807         | 2110073 |          |
| AA460463 | Cytokine-like protein C17                                                | <i>C17</i>                  | 54360          | 796569  |          |
| BX099263 | Prominin 1                                                               | <i>PROM1</i>                | 8842           | 27544   |          |
| R59936   | Potassium inwardly-rectifying channel, subfamily J, member 6             | <i>KCNJ6</i>                | 3763           | 43101   |          |
| AA412053 | CD9 antigen (p24)                                                        | <i>CD9</i>                  | 928            | 727251  |          |
| AA485353 | Lectin, galactoside-binding, soluble, 3 binding protein                  | <i>LGALS3BP</i>             | 3959           | 811000  |          |
| N68512   | Hermansky-Pudlak syndrome 4                                              | <i>HPS4</i>                 | 89781          | 294089  |          |
| AA425612 | Solute carrier family 16 (monocarboxylic acid transporters), member 2    | <i>SLC16A2</i>              | 6567           | 773344  |          |
| AA209529 | Interferon, alpha-inducible protein 27                                   | <i>IFI27</i>                | 3429           | 588915  | CD71/GPA |
| W01240   | Membrane protein, palmitoylated 1, 55kDa                                 | <i>MPP1</i>                 | 4354           | 296880  | CD71/GPA |
| AA496795 | Intersectin 1 (SH3 domain protein)                                       | <i>ITSN1</i>                | 6453           | 897652  | CD71/GPA |
| H98134   | Protein phosphatase 1A (formerly 2C), magnesium-dependent, alpha isoform | <i>PPM1A</i>                | 5494           | 261102  | CD71/GPA |
| R89905   | Ubiquitin specific protease 9, X-linked (fat facets-like, Drosophila)    | <i>USP9X</i>                | 8239           | 194706  | CD71/GPA |
| N71286   | Tripartite motif-containing 10                                           | <i>TRIM10</i>               | 10107          | 294655  | CD71/GPA |
| AA454770 | Rab interacting lysosomal protein                                        | <i>RILP</i>                 | 83547          | 809739  | CD71/GPA |
| AI693616 | Class-I MHC-restricted T cell associated molecule                        | <i>CRTAM</i>                | 56253          | 2337808 | CD71/GPA |
| AA626782 | Chromosome 18 open reading frame 23                                      | <i>C18orf23</i>             | 147341         | 877763  |          |
| T46897   | Adhesion regulating molecule 1                                           | <i>ADRM1</i>                | 11047          | 78869   |          |
| AA425938 | Legumain                                                                 | <i>LGMN</i>                 | 5641           | 760298  |          |
| BX093287 | SH3 multiple domains 2                                                   | <i>SH3MD2</i>               | 57630          | 811101  |          |
| BX105795 | Ephrin-B1                                                                | <i>EFNB1</i>                | 1947           | 756968  |          |
| AA953508 | SET binding protein 1                                                    | <i>SETBP1</i>               | 26040          | 1562231 |          |
| AA188661 | SH3-domain binding protein 5 (BTK-associated)                            | <i>SH3BP5</i>               | 9467           | 626343  |          |
| CR742982 | Multiple cluster hits:257761 & 410969                                    | <i>SH3BP5 &amp; NTRK3</i>   | 9467 & 4916    | 35356   |          |
| AA989257 | SH3-domain kinase binding protein 1                                      | <i>SH3KBP1</i>              | 30011          | 1604005 | Leukemic |
| R48131   | Multiple cluster hits:167679 & 537269                                    | <i>SH3BP2 &amp; 0</i>       | 6452 & 0       | 153694  | Leukemic |
| AI948893 | SH3-domain binding protein 2                                             | <i>SH3BP2</i>               | 6452           | 2471503 | Leukemic |
| AA056375 | Hypothetical protein from clone 643                                      | <i>LOC57228</i>             | 57228          | 509458  | Leukemic |
| H09456   | Target of myb1-like 2 (chicken)                                          | <i>TOMIL2</i>               | 146691         | 46278   | Leukemic |
| R52176   | Multiple cluster hits:180257 & 407983                                    | <i>ZNF550 &amp; SFMBT2</i>  | 162972 & 57713 | 40296   | Leukemic |
| CR744656 | Calmodulin regulated spectrin-associated protein 1                       | <i>CAMSAP1</i>              | 157922         | 49228   | Leukemic |
| H09105   | Multiple cluster hits:475733 & 547224                                    | <i>TOP2B &amp; 0</i>        | 7155 & 0       | 46180   | Leukemic |
| AA663941 | LOC387882 hypothetical protein                                           | <i>LOC387882</i>            | 387882         | 855707  | Leukemic |
| AA099522 | Zinc finger, CW type with coiled-coil domain 2                           | <i>ZCWC2</i>                | 79710          | 489594  | Leukemic |
| AI537061 | Sex comb on midleg-like 1 (Drosophila)                                   | <i>SCML1</i>                | 6322           | 2184814 | Leukemic |
| AA705772 | Collagen, type XXVII, alpha 1                                            | <i>COL27A1</i>              | 85301          | 379517  | Leukemic |
| BX103653 | Breast cancer membrane protein 101                                       | <i>NSE2</i>                 | 157638         | 278572  |          |

|          |                                                                           |                               |               |         |          |
|----------|---------------------------------------------------------------------------|-------------------------------|---------------|---------|----------|
| R67222   | Chromosome 6 open reading frame 192                                       | <i>C6orf192</i>               | 116843        | 140852  |          |
| AA194201 | Bradykinin receptor B2                                                    | <i>BDKRB2</i>                 | 624           | 665674  |          |
| N49899   | Solute carrier family 18 (vesicular monoamine), member 2                  | <i>SLC18A2</i>                | 6571          | 243653  |          |
| N73975   | Transcription elongation factor A (SII)-like 4                            | <i>TCEAL4</i>                 | 79921         | 296616  |          |
| AA876375 | Leukotriene B4 12-hydroxydehydrogenase                                    | <i>LTB4DH</i>                 | 22949         | 1493107 |          |
| AI245605 | D-aspartate oxidase                                                       | <i>DDO</i>                    | 8528          | 1870049 |          |
| AA282029 | LIM domain only 2 (rhombotin-like 1)                                      | <i>LMO2</i>                   | 4005          | 712829  |          |
| H09375   | Cellular repressor of E1A-stimulated genes 2                              | <i>CREG2</i>                  | 200407        | 45999   |          |
| AA410481 | KIAA0934                                                                  | <i>KIAA0934</i>               | 22982         | 754451  |          |
| AA630138 | Zinc finger protein 185 (LIM domain)                                      | <i>ZNF185</i>                 | 7739          | 855079  |          |
| AW004620 | Calcium/calmodulin-dependent protein kinase I                             | <i>CAMK1</i>                  | 8536          | 2505310 |          |
| AA045399 | Hypothetical protein LOC162073                                            | <i>LOC162073</i>              | 162073        | 487831  |          |
| AA099515 | Signal sequence receptor, alpha (translocon-associated protein alpha)     | <i>SSRI</i>                   | 6745          | 510679  |          |
| H26485   | Chromosome 6 open reading frame 68                                        | <i>C6orf68</i>                | 116150        | 161823  |          |
| N66942   | Progesterone receptor membrane component 1                                | <i>PGRMC1</i>                 | 10857         | 295798  |          |
| H59757   | V-raf murine sarcoma 3611 viral oncogene homolog 1                        | <i>ARAF1</i>                  | 369           | 207618  |          |
| AA928142 | Porcupine homolog (Drosophila)                                            | <i>PORCN</i>                  | 64840         | 1541827 |          |
| H15095   | Multiple cluster hits:535978 & 549718                                     | <i>0 &amp; CXorf40</i>        | 0 & 91966     | 49249   |          |
| AA629796 | Sorting nexin 12                                                          | <i>SNX12</i>                  | 29934         | 884540  |          |
| AA459420 | Hypothetical protein FLJ20699                                             | <i>FLJ20699</i>               | 55020         | 810981  |          |
| AA047623 | Progesterone receptor membrane component 2                                | <i>PGRMC2</i>                 | 10424         | 376785  |          |
| H85311   | Stress 70 protein chaperone, microsome-associated, 60kDa                  | <i>STCH</i>                   | 6782          | 222025  |          |
| N47922   | FLJ10378 protein                                                          | <i>FLJ10378</i>               | 55132         | 260181  |          |
| AI682474 | Nuclear transport factor 2-like export factor 2                           | <i>NXT2</i>                   | 55916         | 2322396 |          |
| AA996131 | SH3 domain binding glutamic acid-rich protein like                        | <i>SH3BGRL</i>                | 6451          | 1603583 |          |
| AA056693 | Phosphatidic acid phosphatase type 2B                                     | <i>PPAP2B</i>                 | 8613          | 489201  |          |
| AA625621 | Chromosome 14 open reading frame 131                                      | <i>C14orf131</i>              | 55778         | 877822  |          |
| AA677340 | Phosphorylase kinase, alpha 2 (liver)                                     | <i>PHKA2</i>                  | 5256          | 454475  |          |
| W74254   | Linker for activation of T cells                                          | <i>LAT</i>                    | 27040         | 346360  |          |
| AA464059 | Coagulation factor VIII-associated (intronic transcript) 1                | <i>F8A1</i>                   | 8263          | 810264  |          |
| BX102083 | Multiple cluster hits:475970 & 548668                                     | <i>OXSRI &amp; 0</i>          | 9943 & 0      | 198690  |          |
| AA970720 | KIAA0592 protein                                                          | <i>KIAA0592</i>               | 253725        | 1573087 |          |
| N78101   | Cyclin I                                                                  | <i>CCNI</i>                   | 10983         | 248295  |          |
| CR736883 | Multiple cluster hits:397638 & 525330                                     | <i>WDR5 &amp; ARF6</i>        | 11091 & 382   | 360885  |          |
| BX112916 | RAB40C, member RAS oncogene family                                        | <i>RAB40C</i>                 | 57799         | 136303  |          |
| AA669443 | Eukaryotic translation initiation factor 5                                | <i>EIF5</i>                   | 1983          | 884867  |          |
| N53133   | Spermatid perinuclear RNA binding protein                                 | <i>STRBP</i>                  | 55342         | 246620  |          |
| AA599187 | Phosphoglycerate kinase 1                                                 | <i>PGK1</i>                   | 5230          | 949939  |          |
| H24099   | Cystatin B (stefin B)                                                     | <i>CSTB</i>                   | 1476          | 51814   |          |
| BX090714 | Pyruvate dehydrogenase kinase, isoenzyme 3                                | <i>PDK3</i>                   | 5165          | 278242  |          |
| AI983274 | ATPase, H+ transporting, lysosomal accessory protein 2                    | <i>ATP6AP2</i>                | 10159         | 2517344 |          |
| AA630373 | Chromosome 10 open reading frame 56                                       | <i>C10orf56</i>               | 219654        | 854897  |          |
| AI299482 | Hairy/enhancer-of-split related with YRPW motif 2                         | <i>HEY2</i>                   | 23493         | 1895748 |          |
| AI871665 | Acetyl-Coenzyme A acetyltransferase 1 (acetoacetyl Coenzyme A thiolase)   | <i>ACAT1</i>                  | 38            | 2292807 |          |
| CR737717 | Multiple cluster hits:13318 & 503666                                      | <i>DISC1 &amp; GPKOW</i>      | 27185 & 27238 | 26910   | CD71/GPA |
| R62411   | Chromosome 6 open reading frame 89                                        | <i>C6orf89</i>                | 221477        | 152515  | CD71/GPA |
| N77107   | Multiple cluster hits:260555 & 293970                                     | <i>C14orf45 &amp; ALDH6A1</i> | 80127 & 4329  | 289818  | CD71/GPA |
| H15504   | Annexin A7                                                                | <i>ANXA7</i>                  | 310           | 49352   | CD71/GPA |
| R92281   | Cytochrome B 5                                                            | <i>CYB5</i>                   | 1528          | 196189  | CD71/GPA |
| AA599127 | Superoxide dismutase 1, soluble (amyotrophic lateral sclerosis 1 (adult)) | <i>SOD1</i>                   | 6647          | 950489  | CD71/GPA |

|          |                                                                                                   |                            |             |         |               |
|----------|---------------------------------------------------------------------------------------------------|----------------------------|-------------|---------|---------------|
| N47483   | Glutathione S-transferase A4                                                                      | <i>GSTA4</i>               | 2941        | 280769  |               |
| AI298194 | Zinc finger protein 318                                                                           | <i>ZNF318</i>              | 24149       | 1896746 |               |
| BX108537 | Multiple cluster hits:2815 & 369761                                                               | <i>POU6F1 &amp; DAZAP2</i> | 5463 & 9802 | 289447  |               |
| AA464965 | Hypothetical protein DT1P1A10                                                                     | <i>DT1P1A10</i>            | 90121       | 810093  |               |
| AA029331 | LCHN protein                                                                                      | <i>LCHN</i>                | 57189       | 366763  |               |
| AW074953 | Chromosome 21 open reading frame 2                                                                | <i>C21orf2</i>             | 755         | 2572207 |               |
| AI349234 | Family with sequence similarity 26, member B                                                      | <i>FAM26B</i>              | 51063       | 2049813 |               |
| AA278240 | Haloacid dehalogenase-like hydrolase domain containing 1A                                         | <i>HDHD1A</i>              | 8226        | 703479  | Leukemic      |
| AI001010 | A disintegrin-like and metalloprotease (reprolysin type) with thrombospondin type 1 motif, 7      | <i>ADAMTS7</i>             | 11173       | 1609975 | Leukemic      |
| AA126799 | Glycosyltransferase 28 domain containing 1                                                        | <i>GLT28D1</i>             | 55849       | 490548  | Leukemic      |
| AA070661 | S100 calcium binding protein A13                                                                  | <i>S100A13</i>             | 6284        | 530035  | Leukemic      |
| H02929   | Ring finger protein 153                                                                           | <i>RNF153</i>              | 54708       | 151755  | Leukemic      |
| N22323   | Mst3 and SOK1-related kinase                                                                      | <i>MST4</i>                | 51765       | 254029  | Leukemic      |
| AI393281 | KIAA1217                                                                                          | <i>KIAA1217</i>            | 56243       | 2108778 | Leukemic      |
| AA465717 | WD repeat domain 9                                                                                | <i>WDR9</i>                | 54014       | 814975  | Leukemic      |
| BX092901 | Hypothetical LOC402582                                                                            | <i>0</i>                   | 402582      | 133860  | Leukemic      |
| AA670134 | Tetratricopeptide repeat domain 3                                                                 | <i>TTC3</i>                | 7267        | 844725  | Leukemic      |
| AA679345 | Heterogeneous nuclear ribonucleoprotein H2 (H')                                                   | <i>HNRPH2</i>              | 3188        | 866874  | Leukemic      |
| R43580   | Ubiquilin 2                                                                                       | <i>UBQLN2</i>              | 29978       | 23018   | Leukemic      |
| AA167328 | Implantation-associated protein                                                                   | <i>DKFZp564K142</i>        | 84061       | 595620  | Leukemic      |
| BX108643 | Cyclin C                                                                                          | <i>CCNC</i>                | 892         | 789318  | Leukemic      |
| W55967   | MAP3K12 binding inhibitory protein 1                                                              | <i>MBIP</i>                | 51562       | 340555  | Leukemic      |
| AA488237 | Hypothetical protein MGC23937 similar to CG4798                                                   | <i>MGC23937</i>            | 139596      | 877637  | Leukemic      |
| R25001   | Solute carrier family 9 (sodium/hydrogen exchanger), isoform 6                                    | <i>SLC9A6</i>              | 10479       | 20115   | Leukemic      |
| AA251026 | Transmembrane protein 32                                                                          | <i>TMEM32</i>              | 93380       | 684539  | Leukemic      |
| H61901   | Ribosomal protein S6 kinase, 90kDa, polypeptide 3                                                 | <i>RPS6KA3</i>             | 6197        | 204148  | Leukemic      |
| AW051907 | KIAA0179                                                                                          | <i>KIAA0179</i>            | 23076       | 2557117 | Leukemic      |
| BX116655 | Follicular lymphoma variant translocation 1                                                       | <i>FVT1</i>                | 2531        | 233765  | Leukemic      |
| H20774   | SWI/SNF related, matrix associated, actin dependent regulator of chromatin, subfamily a, member 4 | <i>SMARCA4</i>             | 6597        | 173169  | Leukemic      |
| AW005979 | Interleukin-1 receptor-associated kinase 1                                                        | <i>IRAK1</i>               | 3654        | 2566158 | Leukemic      |
| AA706929 | Protein phosphatase 1F (PP2C domain containing)                                                   | <i>PPM1F</i>               | 9647        | 451855  | Leukemic      |
| AA482594 | Kelch-like 5 (Drosophila)                                                                         | <i>KLHL5</i>               | 51088       | 746080  | Leukemic      |
| R35848   | Membrane-bound transcription factor protease, site 2                                              | <i>MBTPS2</i>              | 51360       | 38450   | Leukemic      |
| AA281733 | Multiple cluster hits:522590 & 535251                                                             | <i>EIFIAX &amp; 0</i>      | 1964 & 0    | 712436  | Leukemic      |
| AA630381 | Chromosome 14 open reading frame 147                                                              | <i>C14orf147</i>           | 171546      | 855345  | Leukemic      |
| N62311   | Myozenin 3                                                                                        | <i>MYOZ3</i>               | 91977       | 287791  | CD34/immature |
| AA459663 | Peroxiredoxin 4                                                                                   | <i>PRDX4</i>               | 10549       | 795543  | CD34/immature |
| AA486239 | Filamin B, beta (actin binding protein 278)                                                       | <i>FLNB</i>                | 2317        | 840818  | CD34/immature |
| AA491107 | Multiple cluster hits:449098 & 549611                                                             | <i>KIAA0685 &amp; 0</i>    | 9701 & 0    | 824557  | CD34/immature |
| AA491271 | Hypothetical protein FLJ12525                                                                     | <i>FLJ12525</i>            | 81887       | 824622  | CD34/immature |
| AA054701 | Non-POU domain containing, octamer-binding                                                        | <i>NONO</i>                | 4841        | 509887  | CD34/immature |
| BX099233 | Down syndrome critical region gene 5                                                              | <i>DSCR5</i>               | 51227       | 785642  | CD34/immature |
| AA429946 | Dehydrogenase/reductase (SDR family) member 4                                                     | <i>DHRS4</i>               | 10901       | 781295  | CD34/immature |
| N48017   | CDNA clone IMAGE:4686928, partial cds                                                             | <i>IMAGE:4686928</i>       | 0           | 272049  | Leukemic      |
| AA451969 | Transcription elongation factor A (SII)-like 1                                                    | <i>TCEAL1</i>              | 9338        | 786607  | Leukemic      |
| AA872379 | SMT3 suppressor of mif two 3 homolog 3 (yeast)                                                    | <i>SUMO3</i>               | 6612        | 1472719 | Leukemic      |
| AA995351 | Retinoblastoma binding protein 7                                                                  | <i>RBBP7</i>               | 5931        | 1601546 | Leukemic      |
| AA151486 | Phosphoribosyl pyrophosphate synthetase 2                                                         | <i>PRPS2</i>               | 5634        | 503097  | Leukemic      |
| AA456444 | Hypothetical protein FLJ31978                                                                     | <i>FLJ31978</i>            | 144423      | 809504  | Leukemic      |
| AA446730 | Upstream regulatory element binding protein 1                                                     | <i>UREB1</i>               | 10075       | 783681  | Leukemic      |

|          |                                                             |                |       |        |          |
|----------|-------------------------------------------------------------|----------------|-------|--------|----------|
| H94063   | Chromosome 13 open reading frame 1                          | <i>C13orf1</i> | 57213 | 242840 | Leukemic |
| R77104   | Proteasome (prosome, macropain) 26S subunit, non-ATPase, 10 | <i>PSMD10</i>  | 5716  | 143997 | Leukemic |
| AA029842 | Mature T cell proliferation 1                               | <i>MTCP1</i>   | 4515  | 470175 | Leukemic |

---
