# Supplementary material
Source: PubMed Central journal article supplement (PMC1323166)
Supplement: pnas_0506637102_27.pdf [file pnas_0506637102_27.pdf]

**Table 28. Gene order according to the hierarchical clustering of the differentially expressed genes for the *MLL*-positive cases and the normal bone marrows and purified hematopoietic cells**

| Accession no. | Gene name                                                                                                    | Gene symbol              | Entrez gene  | Reporter ID | Signature |
|---------------|--------------------------------------------------------------------------------------------------------------|--------------------------|--------------|-------------|-----------|
| R11551        | Cholesteryl ester transfer protein, plasma                                                                   | <i>CETP</i>              | 1071         | 129988      |           |
| AA872011      | AXIN1 up-regulated 1                                                                                         | <i>AXUD1</i>             | 64651        | 1475662     |           |
| AI090702      | Kinesin-associated protein 3                                                                                 | <i>KIFAP3</i>            | 22920        | 1692195     |           |
| AA401578      | Chromosome 16 open reading frame 5                                                                           | <i>C16orf5</i>           | 29965        | 742562      |           |
| AA055194      | DEAH (Asp-Glu-Ala-His) box polypeptide 29                                                                    | <i>DHX29</i>             | 54505        | 377193      |           |
| AA128553      | Amyloid beta (A4) precursor protein (protease nexin-II, Alzheimer disease)                                   | <i>APP</i>               | 351          | 526616      |           |
| H90975        | Neural precursor cell expressed, developmentally down-regulated 4                                            | <i>NEDD4</i>             | 4734         | 240711      |           |
| N49899        | Solute carrier family 18 (vesicular monoamine), member 2                                                     | <i>SLC18A2</i>           | 6571         | 243653      |           |
| AA421512      | Islet cell autoantigen 1, 69kDa                                                                              | <i>ICA1</i>              | 3382         | 731129      |           |
| H29077        | Lysosomal-associated membrane protein 1                                                                      | <i>LAMP1</i>             | 3916         | 49710       |           |
| AA886758      | Chromosome 1 open reading frame 24                                                                           | <i>C1orf24</i>           | 116496       | 1500241     |           |
| BX107491      | Vitamin K epoxide reductase complex, subunit 1-like 1                                                        | <i>VKORC1L1</i>          | 154807       | 470006      |           |
| N63988        | Interferon-induced protein with tetratricopeptide repeats 2                                                  | <i>IFIT2</i>             | 3433         | 289496      |           |
| N53061        | Hypothetical protein MGC5242                                                                                 | <i>MGC5242</i>           | 78996        | 246546      |           |
| AA609460      | Nuclear receptor subfamily 6, group A, member 1                                                              | <i>NR6A1</i>             | 2649         | 743582      |           |
| AI888228      | Alanyl (membrane) aminopeptidase (aminopeptidase N, aminopeptidase M, microsomal aminopeptidase, CD13, p150) | <i>ANPEP</i>             | 290          | 2441080     |           |
| R66325        | Colony stimulating factor 2 receptor, beta, low-affinity (granulocyte-macrophage)                            | <i>CSF2RB</i>            | 1439         | 141115      |           |
| BX281560      | Nuclear RNA export factor 3                                                                                  | <i>NXF3</i>              | 56000        | 430291      |           |
| BX089808      | Hypothetical protein LOC285812                                                                               | <i>LOC285812</i>         | 285812       | 32522       |           |
| BX102233      | Breast cancer 1, early onset                                                                                 | <i>BRCA1</i>             | 672          | 241474      |           |
| BX096034      | Asialoglycoprotein receptor 1                                                                                | <i>ASGR1</i>             | 432          | 204541      |           |
| H59916        | Multiple cluster hits:375108 & 511464                                                                        | <i>CD24 &amp; 0</i>      | 934 & 440281 | 204335      |           |
| AA421691      | UDP-glucose ceramide glucosyltransferase                                                                     | <i>UGCG</i>              | 7357         | 739123      |           |
| N74131        | Trefoil factor 3 (intestinal)                                                                                | <i>TFF3</i>              | 7033         | 298417      |           |
| AA411757      | Carcinoembryonic antigen-related cell adhesion molecule 1 (biliary glycoprotein)                             | <i>CEACAM1</i>           | 634          | 753301      |           |
| AI745626      | Metallothionein 1G                                                                                           | <i>MT1G</i>              | 4495         | 2317017     |           |
| N27159        | Inhibin, beta A (activin A, activin AB alpha polypeptide)                                                    | <i>INHBA</i>             | 3624         | 269815      |           |
| AA778089      | Leucine rich repeat neuronal 1                                                                               | <i>LRRN1</i>             | 57633        | 379709      |           |
| BX099462      | Hypoxia-inducible factor 1, alpha subunit (basic helix-loop-helix transcription factor)                      | <i>HIF1A</i>             | 3091         | 325117      |           |
| AA894557      | Creatine kinase, brain                                                                                       | <i>CKB</i>               | 1152         | 1416782     |           |
| AA629591      | Testis enhanced gene transcript (BAX inhibitor 1)                                                            | <i>TEGT</i>              | 7009         | 884766      |           |
| AA701996      | Delta-like 1 homolog (Drosophila)                                                                            | <i>DLK1</i>              | 8788         | 436121      |           |
| AA452937      | Syntaxin binding protein 6 (amisyn)                                                                          | <i>STXBP6</i>            | 29091        | 788524      |           |
| AA703392      | Complement factor H-related 1                                                                                | <i>CFHL1</i>             | 3078         | 450060      |           |
| R01638        | CTD (carboxy-terminal domain, RNA polymerase II, polypeptide A) small phosphatase-like                       | <i>CTDSPL</i>            | 10217        | 123980      |           |
| H47496        | Multiple cluster hits:15792 & 496755                                                                         | <i>0 &amp; C14orf128</i> | 0 & 84837    | 193151      |           |
| AA055440      | Sprouty homolog 1, antagonist of FGF signaling (Drosophila)                                                  | <i>SPRY1</i>             | 10252        | 377468      |           |
| AA489040      | Ecotropic viral integration site 2A                                                                          | <i>EVI2A</i>             | 2123         | 824933      |           |
| AA453789      | Multiple cluster hits:90572 & 460468                                                                         | <i>PTK7 &amp; XPO6</i>   | 5754 & 23214 | 813742      |           |
| BX106131      | Thyrotropin-releasing hormone                                                                                | <i>TRH</i>               | 7200         | 382787      |           |
| AI681015      | Suppressor of cytokine signaling 6                                                                           | <i>SOCS6</i>             | 9306         | 2272331     |           |
| BX099294      | UDP-Gal:betaGlcNAc beta 1,4- galactosyltransferase, polypeptide 6                                            | <i>B4GALT6</i>           | 9331         | 396098      |           |
| AI799757      | Immunoglobulin heavy variable 1/OR15-1                                                                       | <i>0</i>                 | 388077       | 2320870     |           |
| AA707413      | Myc target 1                                                                                                 | <i>MYCT1</i>             | 80177        | 451557      |           |
| AA460463      | Cytokine-like protein C17                                                                                    | <i>C17</i>               | 54360        | 796569      |           |
| AA480851      | Claudin 10                                                                                                   | <i>CLDN10</i>            | 9071         | 810761      |           |
| N47388        | Stonin 2                                                                                                     | <i>STN2</i>              | 85439        | 280602      |           |
| N90806        | Hypothetical protein FLJ14054                                                                                | <i>FLJ14054</i>          | 79614        | 303139      |           |
| N24824        | V-kit Hardy-Zuckerman 4 feline sarcoma viral oncogene homolog                                                | <i>KIT</i>               | 3815         | 269806      |           |
| AA044031      | Hypothetical protein DKFZp762C1112                                                                           | <i>DKFZp762C1112</i>     | 169200       | 486626      |           |
| N59851        | WAS protein family, member 1                                                                                 | <i>WASF1</i>             | 8936         | 284734      |           |

|          |                                                                                   |                          |              |         |                |
|----------|-----------------------------------------------------------------------------------|--------------------------|--------------|---------|----------------|
| W86201   | Transmembrane 4 superfamily member 13                                             | <i>TM4SF13</i>           | 27075        | 416374  |                |
| AA070226 | Selenoprotein P, plasma, 1                                                        | <i>SEPP1</i>             | 6414         | 530814  |                |
| AA863469 | Lipoma HMGIC fusion partner-like 2                                                | <i>LHFPL2</i>            | 10184        | 1469377 |                |
| AA421504 | Mannosyl (beta-1,4-)-glycoprotein beta-1,4-N-acetylglucosaminyltransferase        | <i>MGAT3</i>             | 4248         | 731060  |                |
| AA436506 | Nuclear factor I/X (CCAAT binding transcription factor)                           | <i>NFIX</i>              | 4784         | 753034  |                |
| N68644   | Fibroblast growth factor receptor 3 (achondroplasia, thanatophoric dwarfism)      | <i>FGFR3</i>             | 2261         | 293164  |                |
| T48950   | Rhesus blood group-associated glycoprotein                                        | <i>RHAG</i>              | 6005         | 70489   |                |
| T52280   | Chloride intracellular channel 2                                                  | <i>CLIC2</i>             | 1193         | 71956   |                |
| T91261   | Mannosidase, alpha, class 1A, member 1                                            | <i>MAN1A1</i>            | 4121         | 112629  |                |
| T56858   | Growth factor independent 1B (potential regulator of CDKN1A, translocated in CML) | <i>GF11B</i>             | 8328         | 68266   |                |
| H77541   | Multiple cluster hits:95990 & 284171                                              | <i>PKLR &amp; HCN3</i>   | 5313 & 57657 | 234522  |                |
| AA427666 | Potassium voltage-gated channel, subfamily H (eag-related), member 2              | <i>KCNH2</i>             | 3757         | 770012  |                |
| AA490700 | Myosin, heavy polypeptide 10, non-muscle                                          | <i>MYH10</i>             | 4628         | 823886  |                |
| N20003   | Chromosome 2 open reading frame 32                                                | <i>C2orf32</i>           | 25927        | 263341  |                |
| AA664020 | Deleted in liver cancer 1                                                         | <i>DLC1</i>              | 10395        | 855422  |                |
| BX096127 | Pirin (iron-binding nuclear protein)                                              | <i>PIR</i>               | 8544         | 234237  |                |
| BX104994 | RNA binding protein with multiple splicing 2                                      | <i>RBPMS2</i>            | 348093       | 136668  |                |
| H90152   | Growth hormone regulated TBC protein 1                                            | <i>G RTP1</i>            | 79774        | 240896  |                |
| BX094473 | Syntrophin, beta 2 (dystrophin-associated protein A1, 59kDa, basic component 2)   | <i>SNTB2</i>             | 6645         | 263271  |                |
| W69271   | SH3 domain binding glutamic acid-rich protein like 2                              | <i>SH3BGRL2</i>          | 83699        | 343760  |                |
| AA775223 | Hydroxyprostaglandin dehydrogenase 15-(NAD)                                       | <i>HPGD</i>              | 3248         | 868838  |                |
| AA629926 | Zinc finger protein 544                                                           | <i>ZNF544</i>            | 27300        | 884683  |                |
| W74533   | Latrophilin 2                                                                     | <i>LPHN2</i>             | 23266        | 346583  |                |
| H84154   | Cyclin D2                                                                         | <i>CCND2</i>             | 894          | 249688  |                |
| AW075557 | Bromodomain adjacent to zinc finger domain, 2A                                    | <i>BAZ2A</i>             | 11176        | 2577057 |                |
| AA131248 | Muscleblind-like (Drosophila)                                                     | <i>MBNL1</i>             | 4154         | 503545  | T cell         |
| AA490828 | Chromosome 2 open reading frame 22                                                | <i>C2orf22</i>           | 130814       | 824312  | T cell         |
| N67007   | Multiple cluster hits:268326 & 371021                                             | <i>OCIL &amp; LAPTM5</i> | 29121 & 7805 | 295868  | T cell/ B cell |
| AI302421 | Lectin-like NK cell receptor                                                      | <i>OCIL</i>              | 29121        | 1901749 | T cell/ B cell |
| AA677025 | Similar to annexin II receptor                                                    | <i>0</i>                 | 389289       | 454564  | T cell/II      |
| T82077   | Cell division cycle 27                                                            | <i>CDC27</i>             | 996          | 109708  |                |
| AW029299 | Interleukin 17 receptor                                                           | <i>IL17R</i>             | 23765        | 2543085 | Mature/CD15    |
| BX094091 | Multiple cluster hits:9887 & 378808                                               | <i>0 &amp; eIF2A</i>     | 0 & 83939    | 41132   | Mature/CD15    |
| AA486942 | Capping protein (actin filament), gelsolin-like                                   | <i>CAPG</i>              | 822          | 841059  | Mature/CD15    |
| BX105581 | Lymphocyte antigen 86                                                             | <i>LY86</i>              | 9450         | 2333826 | Mature/CD15    |
| AI984983 | Phospholipase A2, group IVA (cytosolic, calcium-dependent)                        | <i>PLA2G4A</i>           | 5321         | 2494805 |                |
| AA634300 | IGF-II mRNA-binding protein 2                                                     | <i>IMP-2</i>             | 10644        | 743774  |                |
| AA016225 | Chromosome 9 open reading frame 123                                               | <i>C9orf123</i>          | 90871        | 359269  | Leukemic       |
| AW057757 | Palladin                                                                          | <i>KIAA0992</i>          | 23022        | 2542582 | Leukemic       |
| W52082   | Mitochondrial ribosomal protein L33                                               | <i>MRPL33</i>            | 9553         | 325520  | Leukemic       |
| H10488   | Adenylate kinase 2                                                                | <i>AK2</i>               | 204          | 45464   | Leukemic       |
| AA778198 | Pre-B cell leukemia transcription factor 3                                        | <i>PBX3</i>              | 5090         | 448386  | Leukemic       |
| BX112804 | Brevican                                                                          | <i>BCAN</i>              | 63827        | 32687   | Leukemic       |
| AA447599 | Cytoplasmic linker associated protein 2                                           | <i>CLASP2</i>            | 23122        | 782700  | Leukemic       |
| T62715   | Aldo-keto reductase family 7, member A2 (aflatoxin aldehyde reductase)            | <i>AKR7A2</i>            | 8574         | 79592   | Leukemic       |
| AA001444 | Meis1, myeloid ecotropic viral integration site 1 homolog (mouse)                 | <i>MEIS1</i>             | 4211         | 361943  | Leukemic       |
| AA953229 | Homeo box A10                                                                     | <i>HOXA10</i>            | 3206         | 1592006 | Leukemic       |
| BX101261 | Homeo box A4                                                                      | <i>HOXA4</i>             | 3201         | 785930  | Leukemic       |
| AA293453 | Sideroflexin 3                                                                    | <i>SFXN3</i>             | 81855        | 726236  | Leukemic       |
| AA676804 | CCAAT/enhancer binding protein (C/EBP), gamma                                     | <i>CEBPG</i>             | 1054         | 455121  | Leukemic       |
| AI927284 | Lectin, galactoside-binding, soluble, 1 (galectin 1)                              | <i>LGALS1</i>            | 3956         | 2461050 | Leukemic       |
| AI652223 | Wingless-type MMTV integration site family, member 10B                            | <i>WNT10B</i>            | 7480         | 2306221 | Leukemic       |
| BX088745 | B/K protein                                                                       | <i>LOC51760</i>          | 51760        | 1239845 | Leukemic       |
| W70221   | NEDD8-conjugating enzyme                                                          | <i>NCE2</i>              | 140739       | 343967  | Leukemic       |
| AA620591 | CDNA clone MGC:24463 IMAGE:4082362, complete cds                                  | <i>0</i>                 | 0            | 951313  | Leukemic       |
| AA436142 | Sparc/osteonectin, cwcv and kazal-like domains proteoglycan (testican)            | <i>SPOCK</i>             | 6695         | 754358  | Leukemic       |
| AI363200 | Proenkephalin                                                                     | <i>PENK</i>              | 5179         | 2017204 | Leukemic       |
| H71081   | Hexosaminidase B (beta polypeptide)                                               | <i>HEXB</i>              | 3074         | 211780  | Leukemic       |
| T71879   | Complement component 2                                                            | <i>C2</i>                | 717          | 85497   | Leukemic       |
| AI056417 | Mesothelin                                                                        | <i>MSLN</i>              | 10232        | 1669232 | Leukemic       |

|          |                                                                                         |              |        |        |          |
|----------|-----------------------------------------------------------------------------------------|--------------|--------|--------|----------|
| AA708201 | Immunoglobulin superfamily, member 4                                                    | <i>IGSF4</i> | 23705  | 392405 | Leukemic |
| AA775357 | Similar to jumonji domain containing 1A; testis-specific protein A; zinc finger protein | <i>0</i>     | 439979 | 878680 | Leukemic |
| BX116210 | Apolipoprotein C-II                                                                     | <i>APOC2</i> | 344    | 809523 | Leukemic |

---
