# Supplementary material
Source: PubMed Central journal article supplement (PMC1323166)
Supplement: pnas_0506637102_28.pdf [file pnas_0506637102_28.pdf]

**Table 29. Significant categories enriched among the upregulated genes. If more that 25 categories were enriched, the top 25 are shown**

| AML vs. normal cells (NBM and purified hematopoietic cells) |                                                                                                                                                                                                     |           |            |                 |                  |            |
|-------------------------------------------------------------|-----------------------------------------------------------------------------------------------------------------------------------------------------------------------------------------------------|-----------|------------|-----------------|------------------|------------|
| System                                                      | Gene category                                                                                                                                                                                       | List hits | List total | Population hits | Population total | EASE score |
| Cellular component                                          | Lytic vacuole                                                                                                                                                                                       | 14        | 258        | 67              | 5450             | 1.09E-05   |
| Cellular component                                          | Lysosome                                                                                                                                                                                            | 14        | 258        | 67              | 5450             | 1.09E-05   |
| Cellular component                                          | Vacuole                                                                                                                                                                                             | 14        | 258        | 71              | 5450             | 2.10E-05   |
| Molecular function                                          | Transporter activity                                                                                                                                                                                | 55        | 273        | 779             | 5709             | 2.28E-03   |
| Biological process                                          | Catabolism                                                                                                                                                                                          | 34        | 270        | 415             | 5586             | 2.61E-03   |
| Biological process                                          | Carbohydrate catabolism                                                                                                                                                                             | 8         | 270        | 40              | 5586             | 2.64E-03   |
| Molecular function                                          | Catalytic activity                                                                                                                                                                                  | 134       | 273        | 2340            | 5709             | 4.16E-03   |
| Cellular component                                          | Mitochondrion                                                                                                                                                                                       | 32        | 258        | 404             | 5450             | 4.34E-03   |
| Biological process                                          | Transport                                                                                                                                                                                           | 57        | 270        | 835             | 5586             | 4.90E-03   |
| Molecular function                                          | Hydrolase activity\, hydrolyzing O-glycosyl compounds                                                                                                                                               | 8         | 273        | 47              | 5709             | 6.31E-03   |
| Biological process                                          | Carbohydrate metabolism                                                                                                                                                                             | 19        | 270        | 203             | 5586             | 8.56E-03   |
| Molecular function                                          | Electron transporter activity                                                                                                                                                                       | 18        | 273        | 191             | 5709             | 9.16E-03   |
| Biological process                                          | Hexose catabolism                                                                                                                                                                                   | 6         | 270        | 29              | 5586             | 1.14E-02   |
| Biological process                                          | Alcohol catabolism                                                                                                                                                                                  | 6         | 270        | 30              | 5586             | 1.32E-02   |
| Biological process                                          | Monosaccharide catabolism                                                                                                                                                                           | 6         | 270        | 30              | 5586             | 1.32E-02   |
| Molecular function                                          | Hydrolase activity\,acting on glycosyl bonds                                                                                                                                                        | 8         | 273        | 56              | 5709             | 1.62E-02   |
| Biological process                                          | Glycolysis                                                                                                                                                                                          | 5         | 270        | 23              | 5586             | 2.26E-02   |
| Biological process                                          | Nucleocytoplasmic transport                                                                                                                                                                         | 8         | 270        | 60              | 5586             | 2.42E-02   |
| Molecular function                                          | Metal ion transporter activity                                                                                                                                                                      | 7         | 273        | 48              | 5709             | 2.53E-02   |
| Cellular component                                          | Cytoplasm                                                                                                                                                                                           | 132       | 258        | 2446            | 5450             | 2.60E-02   |
| Molecular function                                          | Oxidoreductase activity\,acting on paired donors\, with incorporation or reduction of molecular oxygen\,2-oxoglutarate as one donor\, and incorporation of one atom each of oxygen into both donors | 4         | 273        | 14              | 5709             | 2.63E-02   |
| Biological process                                          | Energy derivation by oxidation of organic compounds                                                                                                                                                 | 9         | 270        | 76              | 5586             | 2.88E-02   |
| Biological process                                          | Main pathways of carbohydrate metabolism                                                                                                                                                            | 7         | 270        | 50              | 5586             | 3.16E-02   |
| Biological process                                          | Alcohol metabolism                                                                                                                                                                                  | 11        | 270        | 107             | 5586             | 3.25E-02   |
| Molecular function                                          | Di-\,tri-valent inorganic cation transporter activity                                                                                                                                               | 4         | 273        | 16              | 5709             | 3.78E-02   |

| B lineage ALL vs. Normal cells (NBM and purified hematopoietic cells) |                                                                |           |            |                 |                  |            |
|-----------------------------------------------------------------------|----------------------------------------------------------------|-----------|------------|-----------------|------------------|------------|
| System                                                                | Gene category                                                  | List hits | List total | Population hits | Population total | EASE score |
| Biological process                                                    | Nucleobase\,nucleoside\,nucleotide and nucleic acid metabolism | 359       | 1037       | 1556            | 6009             | 5.42E-12   |
| Molecular function                                                    | Nucleic acid binding                                           | 351       | 1052       | 1532            | 6141             | 1.27E-11   |
| Cellular component                                                    | Nucleus                                                        | 368       | 1010       | 1640            | 5871             | 7.93E-11   |
| Biological process                                                    | Transcription                                                  | 238       | 1037       | 1018            | 6009             | 3.61E-08   |
| Molecular function                                                    | DNA binding                                                    | 254       | 1052       | 1108            | 6141             | 3.67E-08   |
| Biological process                                                    | Transcription\ DNA-dependent                                   | 227       | 1037       | 977             | 6009             | 1.49E-07   |
| Biological process                                                    | Regulation of transcription                                    | 219       | 1037       | 958             | 6009             | 1.04E-06   |
| Molecular function                                                    | Binding                                                        | 677       | 1052       | 3558            | 6141             | 2.13E-06   |
| Biological process                                                    | Regulation of transcription\,DNA-dependent                     | 211       | 1037       | 935             | 6009             | 4.73E-06   |
| Cellular component                                                    | Chromosome                                                     | 52        | 1010       | 172             | 5871             | 2.94E-05   |
| Biological process                                                    | Chromosome organization and biogenesis (sensu Eukarya)         | 37        | 1037       | 115             | 6009             | 1.40E-04   |
| Cellular component                                                    | Nuclear pore                                                   | 17        | 1010       | 37              | 5871             | 1.79E-04   |
| Cellular component                                                    | Pore complex                                                   | 17        | 1010       | 37              | 5871             | 1.79E-04   |
| Biological process                                                    | Nuclear organization and biogenesis                            | 37        | 1037       | 117             | 6009             | 2.06E-04   |

|                    |                                                            |     |      |      |      |          |
|--------------------|------------------------------------------------------------|-----|------|------|------|----------|
| Biological process | mRNA-nucleus export                                        | 10  | 1037 | 15   | 6009 | 2.41E-04 |
| Biological process | DNA packaging                                              | 33  | 1037 | 101  | 6009 | 2.54E-04 |
| Biological process | Establishment and/or maintenance of chromatin architecture | 31  | 1037 | 93   | 6009 | 2.76E-04 |
| Cellular component | Chromatin                                                  | 33  | 1010 | 105  | 5871 | 5.19E-04 |
| Biological process | Chromatin assembly/disassembly                             | 22  | 1037 | 60   | 6009 | 6.73E-04 |
| Molecular function | ATP dependent helicase activity                            | 25  | 1052 | 73   | 6141 | 7.28E-04 |
| Cellular component | Transcription factor complex                               | 67  | 1010 | 270  | 5871 | 1.22E-03 |
| Cellular component | Nuclear membrane                                           | 23  | 1010 | 67   | 5871 | 1.29E-03 |
| Molecular function | RNA binding                                                | 71  | 1052 | 292  | 6141 | 1.38E-03 |
| Cellular component | Intracellular                                              | 735 | 1010 | 4043 | 5871 | 1.79E-03 |
| Biological process | RNA-nucleus export                                         | 10  | 1037 | 19   | 6009 | 2.30E-03 |

T cell ALL vs. normal cells (NBM and purified hematopoietic cells)

| System             | Gene Category                                                  | List hits | List total | Population hits | Population total + F152 | EASE score |
|--------------------|----------------------------------------------------------------|-----------|------------|-----------------|-------------------------|------------|
| Biological process | nucleobase\ nucleoside\ nucleotide and nucleic acid metabolism | 234       | 572        | 1489            | 5750                    | 1.53E-16   |
| Cellular component | Nucleus                                                        | 227       | 559        | 1584            | 5620                    | 2.67E-11   |
| Molecular function | Nucleic acid binding                                           | 214       | 583        | 1482            | 5880                    | 8.24E-11   |
| Biological process | mRNA metabolism                                                | 30        | 572        | 104             | 5750                    | 1.47E-07   |
| Biological process | DNA metabolism                                                 | 62        | 572        | 318             | 5750                    | 1.90E-07   |
| Biological process | RNA localization                                               | 12        | 572        | 19              | 5750                    | 3.04E-07   |
| Biological process | mRNA processing                                                | 28        | 572        | 99              | 5750                    | 6.48E-07   |
| Molecular function | RNA binding                                                    | 56        | 583        | 292             | 5880                    | 1.33E-06   |
| Biological process | Nucleic acid transport                                         | 11        | 572        | 18              | 5750                    | 1.81E-06   |
| Biological process | RNA transport                                                  | 11        | 572        | 18              | 5750                    | 1.81E-06   |
| Biological process | RNA-nucleus export                                             | 11        | 572        | 18              | 5750                    | 1.81E-06   |
| Biological process | RNA metabolism                                                 | 49        | 572        | 245             | 5750                    | 2.24E-06   |
| Molecular function | DNA binding                                                    | 149       | 583        | 1066            | 5880                    | 2.28E-06   |
| Cellular component | Pore complex                                                   | 15        | 559        | 37              | 5620                    | 5.41E-06   |
| Cellular component | Nuclear pore                                                   | 15        | 559        | 37              | 5620                    | 5.41E-06   |
| Biological process | RNA processing                                                 | 46        | 572        | 232             | 5750                    | 6.21E-06   |
| Biological process | Transcription                                                  | 135       | 572        | 966             | 5750                    | 9.91E-06   |
| Cellular component | Nuclear membrane                                               | 20        | 559        | 66              | 5620                    | 1.28E-05   |
| Biological process | mRNA-nucleus export                                            | 9         | 572        | 14              | 5750                    | 1.57E-05   |
| Biological process | Nucleobase\,nucleoside\ nucleotide and nucleic acid transport  | 11        | 572        | 22              | 5750                    | 1.85E-05   |
| Biological process | RNA splicing                                                   | 22        | 572        | 80              | 5750                    | 2.18E-05   |
| Molecular function | Binding                                                        | 381       | 583        | 3384            | 5880                    | 3.60E-05   |
| Biological process | Metabolism                                                     | 386       | 572        | 3433            | 5750                    | 3.74E-05   |
| Biological process | Transcription\,DNA-dependent                                   | 128       | 572        | 929             | 5750                    | 3.79E-05   |
| Biological process | Nucleocytoplasmic transport                                    | 19        | 572        | 65              | 5750                    | 3.87E-05   |

TCF3/PBX1 vs.. the remaining B lineage ALLs

| System             | Gene category      | List hits | List total | Population hits | Population total | EASE score |
|--------------------|--------------------|-----------|------------|-----------------|------------------|------------|
| Biological process | Cell cycle         | 33        | 255        | 450             | 5663             | 5.61E-03   |
| Biological process | Cell proliferation | 42        | 255        | 617             | 5663             | 5.83E-03   |
| Biological process | Mitotic cell cycle | 20        | 255        | 230             | 5663             | 7.00E-03   |

|                    |                                                         |     |     |      |      |          |
|--------------------|---------------------------------------------------------|-----|-----|------|------|----------|
| Biological process | Cellular process                                        | 148 | 255 | 2860 | 5663 | 9.54E-03 |
| Biological process | Sex differentiation                                     | 3   | 255 | 4    | 5663 | 1.13E-02 |
| Biological process | Organic acid metabolism                                 | 20  | 255 | 244  | 5663 | 1.28E-02 |
| Molecular function | Transferase activity                                    | 47  | 256 | 763  | 5792 | 1.46E-02 |
| Molecular function | Catalytic activity                                      | 122 | 256 | 2363 | 5792 | 1.64E-02 |
| Biological process | Main pathways of carbohydrate metabolism                | 7   | 255 | 49   | 5663 | 2.13E-02 |
| Biological process | Cell growth and/or maintenance                          | 100 | 255 | 1869 | 5663 | 2.36E-02 |
| Molecular function | Transferase activity\,transferring nitrogenous groups   | 4   | 256 | 15   | 5792 | 2.59E-02 |
| Molecular function | Transaminase activity                                   | 4   | 256 | 15   | 5792 | 2.59E-02 |
| Biological process | DNA replication and chromosome cycle                    | 12  | 255 | 128  | 5663 | 2.80E-02 |
| Molecular function | Kinase activity                                         | 29  | 256 | 441  | 5792 | 3.01E-02 |
| Molecular function | Phosphotransferase activity\, alcohol group as acceptor | 25  | 256 | 368  | 5792 | 3.28E-02 |
| Biological process | Branched chain family amino acid metabolism             | 3   | 255 | 7    | 5663 | 3.62E-02 |
| Biological process | Regulation of cell cycle                                | 18  | 255 | 242  | 5663 | 4.31E-02 |
| Biological process | Carboxylic acid metabolism                              | 18  | 255 | 242  | 5663 | 4.31E-02 |
| Molecular function | Protein-tyrosine kinase activity                        | 13  | 256 | 159  | 5792 | 4.69E-02 |

---

*IGH@MYC* vs. the remaining B lineage ALLs

---

| System             | Gene category        | List hits | List total | Population hits | Population total | EASE score |
|--------------------|----------------------|-----------|------------|-----------------|------------------|------------|
| Cellular component | Nucleus              | 50        | 122        | 1579            | 5522             | 2.98E-03   |
| Cellular component | Nucleolus            | 7         | 122        | 66              | 5522             | 3.04E-03   |
| Cellular component | Intracellular        | 96        | 122        | 3854            | 5522             | 1.98E-02   |
| Biological process | Growth               | 4         | 129        | 26              | 5663             | 2.01E-02   |
| Molecular function | RNA binding          | 13        | 131        | 283             | 5792             | 2.44E-02   |
| Molecular function | Nucleic acid binding | 43        | 131        | 1466            | 5792             | 4.22E-02   |

---

*ETV6/RUNX1* vs. the remaining B lineage ALLs

---

| System             | Gene category                                        | List hits | List total | Population hits | Population total | EASE score |
|--------------------|------------------------------------------------------|-----------|------------|-----------------|------------------|------------|
| Molecular function | Receptor activity                                    | 51        | 333        | 492             | 5792             | 3.36E-05   |
| Molecular function | Signal transducer activity                           | 71        | 333        | 820             | 5792             | 2.56E-04   |
| Molecular function | Transmembrane receptor activity                      | 31        | 333        | 267             | 5792             | 2.60E-04   |
| Molecular function | Binding                                              | 224       | 333        | 3378            | 5792             | 4.09E-04   |
| Cellular component | Chromatin                                            | 16        | 314        | 100             | 5522             | 4.47E-04   |
| Biological process | Cell surface receptor linked signal transduction     | 38        | 319        | 377             | 5663             | 5.08E-04   |
| Molecular function | Metal ion binding                                    | 49        | 333        | 536             | 5792             | 1.00E-03   |
| Biological process | G protein coupled receptor protein signaling pathway | 20        | 319        | 162             | 5663             | 1.68E-03   |
| Cellular component | Membrane                                             | 138       | 314        | 1979            | 5522             | 1.75E-03   |
| Molecular function | Transmembrane receptor protein kinase activity       | 9         | 333        | 44              | 5792             | 3.09E-03   |
| Molecular function | Calcium ion binding                                  | 25        | 333        | 231             | 5792             | 3.12E-03   |
| Biological process | Chromatin assembly/disassembly                       | 10        | 319        | 58              | 5663             | 4.60E-03   |
| Molecular function | Cytoskeletal protein binding                         | 19        | 333        | 161             | 5792             | 4.67E-03   |
| Cellular component | Integral to membrane                                 | 90        | 314        | 1227            | 5522             | 4.77E-03   |
| Cellular component | Chromosome                                           | 19        | 314        | 167             | 5522             | 6.07E-03   |
| Biological process | Cyclic-nucleotide-mediated signaling                 | 6         | 319        | 23              | 5663             | 7.87E-03   |
| Biological process | Enzyme linked receptor protein signaling pathway     | 13        | 319        | 98              | 5663             | 8.31E-03   |
| Biological process | DNA packaging                                        | 13        | 319        | 98              | 5663             | 8.31E-03   |
| Cellular component | Plasma membrane                                      | 57        | 314        | 732             | 5522             | 9.97E-03   |

|                    |                                                            |    |     |     |      |          |
|--------------------|------------------------------------------------------------|----|-----|-----|------|----------|
| Biological process | cAMP-mediated signaling                                    | 5  | 319 | 16  | 5663 | 1.04E-02 |
| Biological process | Second-messenger-mediated signaling                        | 7  | 319 | 34  | 5663 | 1.06E-02 |
| Molecular function | Kinase activity                                            | 38 | 333 | 441 | 5792 | 1.11E-02 |
| Biological process | Establishment and/or maintenance of chromatin architecture | 12 | 319 | 90  | 5663 | 1.14E-02 |
| Biological process | Protein amino acid phosphorylation                         | 28 | 319 | 305 | 5663 | 1.16E-02 |
| Biological process | Phosphorus metabolism                                      | 34 | 319 | 398 | 5663 | 1.42E-02 |

---

*Hyperdiploidy vs. the remaining B lineage ALLs*

---

| System             | Gene category                                                                         | List hits | List total | Population hits | Population total | EASE score |
|--------------------|---------------------------------------------------------------------------------------|-----------|------------|-----------------|------------------|------------|
| Molecular function | Alcohol dehydrogenase activity                                                        | 5         | 364        | 10              | 5792             | 2.35E-03   |
| Cellular component | Membrane                                                                              | 152       | 363        | 1979            | 5522             | 9.75E-03   |
| Molecular function | Alcohol dehydrogenase activity\,zinc-dependent                                        | 4         | 364        | 8               | 5792             | 1.08E-02   |
| Molecular function | Calmodulin regulated protein kinase activity                                          | 5         | 364        | 15              | 5792             | 1.19E-02   |
| Cellular component | Integral to membrane                                                                  | 99        | 363        | 1227            | 5522             | 1.41E-02   |
| Molecular function | SH3/SH2 adaptor protein activity                                                      | 7         | 364        | 35              | 5792             | 2.01E-02   |
| Molecular function | Transmembrane receptor protein tyrosine kinase docking protein activity               | 7         | 364        | 35              | 5792             | 2.01E-02   |
| Molecular function | Transporter activity                                                                  | 63        | 364        | 783             | 5792             | 2.70E-02   |
| Molecular function | Transferase activity\,transferring hexosyl groups                                     | 8         | 364        | 48              | 5792             | 2.85E-02   |
| Molecular function | Transmembrane receptor protein tyrosine kinase signaling protein activity             | 7         | 364        | 40              | 5792             | 3.66E-02   |
| Cellular component | Microsome                                                                             | 7         | 363        | 39              | 5522             | 3.95E-02   |
| Molecular function | Oxidoreductase activity\ acting on the CH-OH group of donors\,NAD or NADP as acceptor | 8         | 364        | 52              | 5792             | 4.19E-02   |
| Cellular component | Vesicular fraction                                                                    | 7         | 363        | 40              | 5522             | 4.41E-02   |
| Molecular function | Acetylgalactosaminyltransferase activity                                              | 3         | 364        | 6               | 5792             | 4.97E-02   |

---

*MLL vs. the remaining B lineage ALLs*

---

| System             | Gene category                | List hits | List total | Population hits | Population total | EASE score |
|--------------------|------------------------------|-----------|------------|-----------------|------------------|------------|
| Cellular component | Microvillus                  | 2         | 38         | 4               | 5522             | 2.65E-02   |
| Molecular function | Structural molecule activity | 6         | 38         | 315             | 5792             | 4.81E-02   |

---

*MLL vs. the remaining AMLs*

---

| System             | Gene category      | List hits | List total | Population hits | Population total | EASE score |
|--------------------|--------------------|-----------|------------|-----------------|------------------|------------|
| Biological process | Cell adhesion      | 7         | 41         | 204             | 4666             | 7.17E-03   |
| Biological process | Cell communication | 17        | 41         | 1053            | 4666             | 9.77E-03   |
| Molecular function | Lyase activity     | 4         | 41         | 60              | 4760             | 1.35E-02   |

---

*MLL vs. the remaining AMLs and B lineage ALLs*

---

| System             | Gene category        | List hits | List total | Population hits | Population total | EASE score |
|--------------------|----------------------|-----------|------------|-----------------|------------------|------------|
| Biological process | Cell adhesion        | 6         | 31         | 238             | 5697             | 7.38E-03   |
| Molecular function | Carbohydrate binding | 3         | 30         | 46              | 5826             | 2.16E-02   |
| Molecular function | Sugar binding        | 3         | 30         | 46              | 5826             | 2.16E-02   |

---
