# Supplementary material
Source: PubMed Central journal article supplement (PMC1323166)
Supplement: pnas_0506637102_29.pdf [file pnas_0506637102_29.pdf]

**Table 30. Significant categories enriched among the downregulated genes. If more that 25 categories were enriched, the top 25 are shown**

| AML vs. normal cells (NBM and purified hematopoietic cells)           |                                                                                     |           |            |                 |                  |            |
|-----------------------------------------------------------------------|-------------------------------------------------------------------------------------|-----------|------------|-----------------|------------------|------------|
| System                                                                | Gene category                                                                       | List hits | List total | Population hits | Population total | EASE score |
| Cellular component                                                    | Extracellular                                                                       | 39        | 299        | 423             | 5450             | 1.36E-03   |
| Biological process                                                    | Morphogenesis                                                                       | 33        | 302        | 382             | 5586             | 7.60E-03   |
| Biological process                                                    | Blood coagulation                                                                   | 7         | 302        | 37              | 5586             | 1.32E-02   |
| Biological process                                                    | Hemostasis                                                                          | 7         | 302        | 41              | 5586             | 2.13E-02   |
| Biological process                                                    | Organogenesis                                                                       | 28        | 302        | 337             | 5586             | 2.34E-02   |
| Biological process                                                    | Development                                                                         | 50        | 302        | 693             | 5586             | 2.54E-02   |
| Biological process                                                    | Hearing                                                                             | 6         | 302        | 32              | 5586             | 2.67E-02   |
| Molecular function                                                    | Cytoskeletal protein binding                                                        | 16        | 314        | 160             | 5709             | 2.85E-02   |
| Biological process                                                    | Perception of sound                                                                 | 6         | 302        | 33              | 5586             | 3.01E-02   |
| Biological process                                                    | Cell adhesion                                                                       | 20        | 302        | 224             | 5586             | 3.20E-02   |
| Biological process                                                    | Amino acid derivative metabolism                                                    | 6         | 302        | 35              | 5586             | 3.78E-02   |
| Molecular function                                                    | Receptor binding                                                                    | 16        | 314        | 167             | 5709             | 3.96E-02   |
| Cellular component                                                    | Extracellular space                                                                 | 14        | 299        | 139             | 5450             | 3.97E-02   |
| Molecular function                                                    | Structural constituent of muscle                                                    | 5         | 314        | 25              | 5709             | 4.51E-02   |
| Molecular function                                                    | Sulfotransferase activity                                                           | 4         | 314        | 15              | 5709             | 4.55E-02   |
| B lineage ALL vs. normal cells (NBM and purified hematopoietic cells) |                                                                                     |           |            |                 |                  |            |
| System                                                                | Gene category                                                                       | List hits | List total | Population hits | Population total | EASE score |
| Cellular component                                                    | Extracellular                                                                       | 141       | 1224       | 444             | 5871             | 2.38E-08   |
| Biological process                                                    | Cell adhesion                                                                       | 83        | 1256       | 245             | 6009             | 1.96E-06   |
| Cellular component                                                    | Extracellular space                                                                 | 56        | 1224       | 147             | 5871             | 2.18E-06   |
| Biological process                                                    | Response to external stimulus                                                       | 166       | 1256       | 579             | 6009             | 2.85E-06   |
| Cellular component                                                    | Vacuole                                                                             | 33        | 1224       | 73              | 5871             | 7.07E-06   |
| Cellular component                                                    | Lysosome                                                                            | 30        | 1224       | 69              | 5871             | 4.94E-05   |
| Cellular component                                                    | Lytic vacuole                                                                       | 30        | 1224       | 69              | 5871             | 4.94E-05   |
| Molecular function                                                    | Carbohydrate binding                                                                | 24        | 1306       | 50              | 6141             | 7.62E-05   |
| Molecular function                                                    | Sugar binding                                                                       | 24        | 1306       | 50              | 6141             | 7.62E-05   |
| Molecular function                                                    | Calcium ion binding                                                                 | 78        | 1306       | 244             | 6141             | 8.12E-05   |
| Molecular function                                                    | Cytoskeletal protein binding                                                        | 58        | 1306       | 169             | 6141             | 9.50E-05   |
| Molecular function                                                    | Oxidoreductase activity,acting on the CH-CH group of Donors,NAD or NADP as acceptor | 13        | 1306       | 20              | 6141             | 1.83E-04   |
| Biological process                                                    | Coenzyme and prosthetic group metabolism                                            | 32        | 1256       | 81              | 6009             | 2.35E-04   |
| Biological process                                                    | Cell motility                                                                       | 49        | 1256       | 143             | 6009             | 2.45E-04   |
| Biological process                                                    | Response to abiotic stimulus                                                        | 64        | 1256       | 204             | 6009             | 4.15E-04   |
| Molecular function                                                    | Structural molecule activity                                                        | 99        | 1306       | 340             | 6141             | 4.24E-04   |
| Cellular component                                                    | Integral to membrane                                                                | 320       | 1224       | 1319            | 5871             | 4.36E-04   |
| Biological process                                                    | Cell communication                                                                  | 322       | 1256       | 1324            | 6009             | 4.37E-04   |
| Molecular function                                                    | Extracellular matrix structural constituent                                         | 17        | 1306       | 33              | 6141             | 4.53E-04   |
| Biological process                                                    | Heterophilic cell adhesion                                                          | 18        | 1256       | 37              | 6009             | 5.37E-04   |
| Biological process                                                    | Response to pest/pathogen/parasite                                                  | 64        | 1256       | 206             | 6009             | 5.54E-04   |
| Biological process                                                    | Coenzyme and prosthetic group biosynthesis                                          | 24        | 1256       | 58              | 6009             | 8.23E-04   |
| Biological process                                                    | Coenzyme biosynthesis                                                               | 17        | 1256       | 35              | 6009             | 8.36E-04   |
| Cellular component                                                    | Extracellular matrix                                                                | 40        | 1224       | 117             | 5871             | 1.00E-03   |
| Molecular function                                                    | Actin binding                                                                       | 42        | 1306       | 123             | 6141             | 1.14E-03   |
| T cell ALL vs. normal cells (NBM and purified hematopoietic cells)    |                                                                                     |           |            |                 |                  |            |

| System             | Gene category                                          | List hits | List total | Population hits | Population total | EASE score |
|--------------------|--------------------------------------------------------|-----------|------------|-----------------|------------------|------------|
| Biological process | Response to external stimulus                          | 124       | 726        | 544             | 5750             | 5.99E-12   |
| Biological process | Immune response                                        | 81        | 726        | 314             | 5750             | 1.24E-10   |
| Biological process | Defense response                                       | 85        | 726        | 339             | 5750             | 1.89E-10   |
| Biological process | Response to biotic stimulus                            | 90        | 726        | 376             | 5750             | 6.73E-10   |
| Biological process | Antigen processing                                     | 14        | 726        | 18              | 5750             | 8.61E-09   |
| Biological process | Antigen presentation                                   | 13        | 726        | 17              | 5750             | 5.02E-08   |
| Molecular function | MHC class II receptor activity                         | 10        | 745        | 11              | 5880             | 3.45E-07   |
| Cellular component | Integral to membrane                                   | 208       | 702        | 1250            | 5620             | 8.88E-07   |
| Molecular function | Signal transducer activity                             | 147       | 745        | 814             | 5880             | 1.77E-06   |
| Biological process | Response to pest/pathogen/parasite                     | 48        | 726        | 189             | 5750             | 2.13E-06   |
| Biological process | Antigen processing\,exogenous antigen via MHC class II | 9         | 726        | 10              | 5750             | 2.20E-06   |
| Biological process | Antigen presentation\ exogenous antigen                | 9         | 726        | 10              | 5750             | 2.20E-06   |
| Biological process | Cell communication                                     | 205       | 726        | 1238            | 5750             | 4.03E-06   |
| Cellular component | Membrane                                               | 303       | 702        | 2001            | 5620             | 7.45E-06   |
| Cellular component | Extracellular                                          | 83        | 702        | 419             | 5620             | 1.11E-05   |
| Molecular function | Endopeptidase inhibitor activity                       | 17        | 745        | 49              | 5880             | 2.13E-04   |
| Molecular function | Protease inhibitor activity                            | 17        | 745        | 49              | 5880             | 2.13E-04   |
| Biological process | Response to wounding                                   | 28        | 726        | 108             | 5750             | 2.90E-04   |
| Molecular function | Receptor activity                                      | 89        | 745        | 492             | 5880             | 3.01E-04   |
| Molecular function | Transmembrane receptor activity                        | 53        | 745        | 267             | 5880             | 7.81E-04   |
| Molecular function | Calcium ion binding                                    | 47        | 745        | 232             | 5880             | 1.05E-03   |
| Biological process | humOral defense mechanism (sensu Vertebrata)           | 17        | 726        | 56              | 5750             | 1.08E-03   |
| Biological process | Antimicrobial humoral response (sensu Vertebrata)      | 14        | 726        | 41              | 5750             | 1.09E-03   |
| Molecular function | Serine-type endopeptidase inhibitor activity           | 12        | 745        | 32              | 5880             | 1.28E-03   |
| Biological process | Antimicrobial humoral response                         | 14        | 726        | 43              | 5750             | 1.78E-03   |

*TCF3/PBX1* vs. the remaining B lineage ALLs

| System             | Gene category                                                                                             | List hits | List total | Population hits | Population total | EASE score |
|--------------------|-----------------------------------------------------------------------------------------------------------|-----------|------------|-----------------|------------------|------------|
| Cellular component | Plasma membrane                                                                                           | 44        | 169        | 732             | 5522             | 9.53E-06   |
| Biological process | Cell communication                                                                                        | 61        | 169        | 1246            | 5663             | 2.64E-05   |
| Molecular function | Transmembrane receptor activity                                                                           | 22        | 173        | 267             | 5792             | 3.56E-05   |
| Molecular function | Receptor activity                                                                                         | 32        | 173        | 492             | 5792             | 3.91E-05   |
| Biological process | Inflammatory response                                                                                     | 11        | 169        | 76              | 5663             | 7.10E-05   |
| Biological process | Innate immune response                                                                                    | 11        | 169        | 78              | 5663             | 8.90E-05   |
| Cellular component | Membrane                                                                                                  | 84        | 169        | 1979            | 5522             | 1.73E-04   |
| Biological process | Response to pest/pathogen/parasite                                                                        | 17        | 169        | 194             | 5663             | 1.82E-04   |
| Biological process | Defense response                                                                                          | 24        | 169        | 349             | 5663             | 2.23E-04   |
| Biological process | Signal transduction                                                                                       | 50        | 169        | 1029            | 5663             | 2.75E-04   |
| Biological process | Response to biotic stimulus                                                                               | 25        | 169        | 382             | 5663             | 3.32E-04   |
| Molecular function | Signal transducer activity                                                                                | 42        | 173        | 820             | 5792             | 3.93E-04   |
| Biological process | Response to wounding                                                                                      | 12        | 169        | 115             | 5663             | 5.55E-04   |
| Cellular component | Integral to plasma membrane                                                                               | 28        | 169        | 468             | 5522             | 7.96E-04   |
| Cellular component | Integral to membrane                                                                                      | 56        | 169        | 1227            | 5522             | 9.33E-04   |
| Biological process | Immune response                                                                                           | 21        | 169        | 323             | 5663             | 1.29E-03   |
| Biological process | Response to external stimulus                                                                             | 29        | 169        | 540             | 5663             | 2.22E-03   |
| Molecular function | Cytokine binding                                                                                          | 5         | 173        | 25              | 5792             | 5.83E-03   |
| Biological process | Cell surface receptor linked signal transduction<br>hematopoietin/interferon-class (D200-domain) cytokine | 21        | 169        | 377             | 5663             | 7.64E-03   |
| Molecular function | Receptor activity                                                                                         | 5         | 173        | 27              | 5792             | 7.73E-03   |

|                    |                                     |    |     |     |      |          |
|--------------------|-------------------------------------|----|-----|-----|------|----------|
| Molecular function | G protein coupled receptor activity | 8  | 173 | 80  | 5792 | 9.26E-03 |
| Biological process | Response to stress                  | 21 | 169 | 399 | 5663 | 1.38E-02 |
| Cellular component | Lytic vacuole                       | 7  | 169 | 66  | 5522 | 1.46E-02 |
| Cellular component | Lysosome                            | 7  | 169 | 66  | 5522 | 1.46E-02 |
| Biological process | Cell adhesion                       | 14 | 169 | 228 | 5663 | 1.74E-02 |

*IGH@MYC* vs. the remaining B lineage ALLs

| System             | Gene category                                              | List hits | List total | Population hits | Population total | EASE score |
|--------------------|------------------------------------------------------------|-----------|------------|-----------------|------------------|------------|
| Biological process | Cellular process                                           | 108       | 173        | 2860            | 5663             | 1.13E-03   |
| Cellular component | Nucleosome                                                 | 7         | 167        | 41              | 5522             | 1.27E-03   |
| Biological process | Cell communication                                         | 56        | 173        | 1246            | 5663             | 1.36E-03   |
| Biological process | Signal transduction                                        | 48        | 173        | 1029            | 5663             | 1.72E-03   |
| Biological process | Nucleosome assembly                                        | 6         | 173        | 35              | 5663             | 3.78E-03   |
| Biological process | Establishment and/or maintenance of chromatin architecture | 9         | 173        | 90              | 5663             | 5.73E-03   |
| Molecular function | Signal transducer activity                                 | 37        | 171        | 820             | 5792             | 7.35E-03   |
| Biological process | Chromatin assembly/disassembly                             | 7         | 173        | 58              | 5663             | 7.87E-03   |
| Biological process | Actin cytoskeleton organization and biogenesis             | 6         | 173        | 42              | 5663             | 8.35E-03   |
| Biological process | DNA packaging                                              | 9         | 173        | 98              | 5663             | 9.48E-03   |
| Biological process | Actin filament based process                               | 6         | 173        | 44              | 5663             | 1.02E-02   |
| Biological process | Chromosome organization and biogenesis (sensu Eukarya)     | 9         | 173        | 111             | 5663             | 1.91E-02   |
| Biological process | Nuclear organization and biogenesis                        | 9         | 173        | 113             | 5663             | 2.10E-02   |
| Biological process | Actin polymerization and/or depolymerization               | 3         | 173        | 9               | 5663             | 2.87E-02   |
| Cellular component | Chromatin                                                  | 8         | 167        | 100             | 5522             | 3.02E-02   |
| Biological process | Immune response                                            | 17        | 173        | 323             | 5663             | 3.54E-02   |

*ETV6/RUNX1* vs. the remaining B lineage ALLs

| System             | Gene category                                                               | List hits | List total | Population hits | Population total | EASE score |
|--------------------|-----------------------------------------------------------------------------|-----------|------------|-----------------|------------------|------------|
| Molecular function | Magnesium ion binding                                                       | 12        | 234        | 70              | 5792             | 9.34E-05   |
| Molecular function | Transferase activity\ transferring alkyl or aryl (other than methyl) groups | 7         | 234        | 30              | 5792             | 1.05E-03   |
| Molecular function | Metal ion binding                                                           | 37        | 234        | 536             | 5792             | 1.32E-03   |
| Biological process | Biosynthesis                                                                | 36        | 224        | 577             | 5663             | 5.79E-03   |
| Molecular function | Structural constituent of ribosome                                          | 12        | 234        | 117             | 5792             | 7.11E-03   |
| Cellular component | Mitochondrion                                                               | 28        | 224        | 414             | 5522             | 8.34E-03   |
| Molecular function | Molecular_function unknown                                                  | 21        | 234        | 282             | 5792             | 9.19E-03   |
| Molecular function | Manganese ion binding                                                       | 5         | 234        | 22              | 5792             | 1.05E-02   |
| Cellular component | Cytoplasm                                                                   | 117       | 224        | 2494            | 5522             | 2.14E-02   |
| Molecular function | Ion transporter activity                                                    | 12        | 234        | 140             | 5792             | 2.49E-02   |
| Cellular component | Ribosome                                                                    | 13        | 224        | 163             | 5522             | 3.14E-02   |
| Biological process | Macromolecule biosynthesis                                                  | 28        | 224        | 477             | 5663             | 3.36E-02   |
| Biological process | TCA intermediate metabolism                                                 | 3         | 224        | 9               | 5663             | 4.63E-02   |
| Cellular component | Eukaryotic 43S preinitiation complex                                        | 5         | 224        | 34              | 5522             | 4.65E-02   |

Hyperdiploidy vs. the remaining B lineage ALLs

| System             | Gene category                 | List hits | List total | Population hits | Population total | EASE score |
|--------------------|-------------------------------|-----------|------------|-----------------|------------------|------------|
| Molecular function | Electron transporter activity | 14        | 209        | 194             | 5790             | 2.18E-02   |

*MLL* vs. the remaining B lineage ALLs

| System | Gene category | List hits | List total | Population hits | Population total | EASE score |
|--------|---------------|-----------|------------|-----------------|------------------|------------|
|--------|---------------|-----------|------------|-----------------|------------------|------------|

|                    |                                                           |    |    |      |      |          |
|--------------------|-----------------------------------------------------------|----|----|------|------|----------|
| Biological process | Cell proliferation                                        | 12 | 35 | 617  | 5663 | 6.40E-04 |
| Biological process | Regulation of transcription from Pol II promoter          | 6  | 35 | 137  | 5663 | 1.22E-03 |
| Biological process | Cell growth and/or maintenance                            | 20 | 35 | 1869 | 5663 | 4.88E-03 |
| Biological process | Cellular process                                          | 25 | 35 | 2860 | 5663 | 1.39E-02 |
| Molecular function | Serine-type endopeptidase inhibitor activity              | 3  | 35 | 32   | 5792 | 1.49E-02 |
| Biological process | Transcription from Pol II promoter                        | 6  | 35 | 248  | 5663 | 1.52E-02 |
| Cellular component | Transcription factor complex                              | 6  | 34 | 259  | 5522 | 1.76E-02 |
| Biological process | Negative regulation of transcription from Pol II promoter | 3  | 35 | 40   | 5663 | 2.37E-02 |
| Molecular function | Protease inhibitor activity                               | 3  | 35 | 45   | 5792 | 2.83E-02 |
| Molecular function | Endopeptidase inhibitor activity                          | 3  | 35 | 45   | 5792 | 2.83E-02 |
| Biological process | Negative regulation of transcription\, DNA-dependent      | 3  | 35 | 47   | 5663 | 3.20E-02 |
| Cellular component | Golgi apparatus                                           | 5  | 34 | 224  | 5522 | 4.29E-02 |

*MLL vs. the remaining AMLs*

| System             | Gene category                                | List hits | List total | Population hits | Population total | EASE score |
|--------------------|----------------------------------------------|-----------|------------|-----------------|------------------|------------|
| Cellular component | Extracellular                                | 20        | 81         | 360             | 4554             | 9.30E-06   |
| Biological process | Cell growth and/or maintenance               | 43        | 83         | 1530            | 4666             | 3.78E-04   |
| Biological process | Metal ion homeostasis                        | 5         | 83         | 29              | 4666             | 1.51E-03   |
| Biological process | Cation homeostasis                           | 5         | 83         | 37              | 4666             | 3.77E-03   |
| Biological process | Cell ion homeostasis                         | 5         | 83         | 38              | 4666             | 4.15E-03   |
| Biological process | Ion homeostasis                              | 5         | 83         | 38              | 4666             | 4.15E-03   |
| Cellular component | Extracellular space                          | 8         | 81         | 119             | 4554             | 4.57E-03   |
| Biological process | Cell homeostasis                             | 5         | 83         | 42              | 4666             | 5.97E-03   |
| Biological process | Homeostasis                                  | 5         | 83         | 42              | 4666             | 5.97E-03   |
| Biological process | Regulation of cellular process               | 8         | 83         | 134             | 4666             | 8.73E-03   |
| Biological process | Regulation of biological process             | 8         | 83         | 135             | 4666             | 9.08E-03   |
| Biological process | Di-\,tri-valent inorganic cation transport   | 4         | 83         | 26              | 4666             | 1.02E-02   |
| Biological process | Di-\ tri-valent inorganic cation homeostasis | 4         | 83         | 27              | 4666             | 1.13E-02   |
| Biological process | Cellular process                             | 53        | 83         | 2384            | 4666             | 1.57E-02   |
| Cellular component | Integral to membrane                         | 28        | 81         | 1053            | 4554             | 1.90E-02   |
| Biological process | Cell proliferation                           | 16        | 83         | 483             | 4666             | 1.95E-02   |
| Molecular function | Transmembrane receptor activity              | 10        | 82         | 241             | 4760             | 2.03E-02   |
| Biological process | Transition metal ion transport               | 3         | 83         | 13              | 4666             | 2.10E-02   |
| Biological process | Regulation of cell growth                    | 4         | 83         | 37              | 4666             | 2.65E-02   |
| Biological process | Transition metal ion homeostasis             | 3         | 83         | 16              | 4666             | 3.12E-02   |
| Biological process | Metal ion transport                          | 5         | 83         | 74              | 4666             | 4.03E-02   |
| Molecular function | Receptor binding                             | 7         | 82         | 152             | 4760             | 4.38E-02   |
| Molecular function | Signal transducer activity                   | 19        | 82         | 706             | 4760             | 4.71E-02   |

*MLL vs. the remaining AMLs and B lineage ALLs*

| System             | Gene category               | List hits | List total | Population hits | Population total | EASE score |
|--------------------|-----------------------------|-----------|------------|-----------------|------------------|------------|
| Cellular component | Cell fraction               | 13        | 59         | 354             | 5556             | 2.29E-04   |
| Cellular component | Membrane fraction           | 10        | 59         | 250             | 5556             | 1.01E-03   |
| Cellular component | Extracellular               | 12        | 59         | 407             | 5556             | 2.80E-03   |
| Cellular component | Integral to plasma membrane | 13        | 59         | 488             | 5556             | 3.87E-03   |
| Molecular function | Signal transducer activity  | 16        | 56         | 849             | 5826             | 1.01E-02   |
| Cellular component | Extracellular space         | 6         | 59         | 130             | 5556             | 1.10E-02   |
| Cellular component | Integral to membrane        | 22        | 59         | 1255            | 5556             | 1.26E-02   |
| Molecular function | Hormone activity            | 3         | 56         | 19              | 5826             | 1.35E-02   |

|                    |                              |    |    |     |      |          |
|--------------------|------------------------------|----|----|-----|------|----------|
| Molecular function | Molecular_function unknown   | 8  | 56 | 282 | 5826 | 1.60E-02 |
| Molecular function | Cytoskeletal protein binding | 6  | 56 | 160 | 5826 | 1.69E-02 |
| Cellular component | Plasma membrane              | 15 | 59 | 756 | 5556 | 2.09E-02 |
| Molecular function | Protein binding              | 15 | 56 | 868 | 5826 | 2.76E-02 |
| Biological process | Protein complex assembly     | 4  | 59 | 65  | 5697 | 2.80E-02 |

---
