# Supplementary material
Source: PubMed Central journal article supplement (PMC1323166)
Supplement: pnas_0506637102_30.pdf [file pnas_0506637102_30.pdf]

**Table 31. Significantly enriched pathway categories from analysis of the up-regulated genes**

| Up in AML vs. normal cells (NBM and purified hematopoietic cells)        |                                        |           |            |                 |                  |            |
|--------------------------------------------------------------------------|----------------------------------------|-----------|------------|-----------------|------------------|------------|
| System                                                                   | Gene category                          | List hits | List total | Population hits | Population total | EASE score |
| Chromosome                                                               | Homo sapiens 2                         | 38        | 318        | 449             | 6800             | 4.36E-04   |
| Chromosome                                                               | Homo sapiens 2p                        | 20        | 318        | 195             | 6800             | 1.77E-03   |
| KEGG pathway                                                             | Carbohydrate metabolism                | 14        | 53         | 97              | 900              | 2.11E-03   |
| KEGG pathway                                                             | Globoside metabolism                   | 4         | 53         | 7               | 900              | 5.41E-03   |
| KEGG pathway                                                             | N-Glycandegradation                    | 4         | 53         | 9               | 900              | 1.19E-02   |
| KEGG pathway                                                             | Sphingoglycolipidmetabolism            | 4         | 53         | 10              | 900              | 1.64E-02   |
| KEGG pathway                                                             | Metabolism of complex lipids           | 12        | 53         | 106             | 900              | 3.30E-02   |
| KEGG pathway                                                             | Glycosaminoglycandegradation           | 3         | 53         | 6               | 900              | 4.23E-02   |
| Up in B lineage ALL normal cells (NBM and purified hematopoietic cells)  |                                        |           |            |                 |                  |            |
| System                                                                   | Gene category                          | List hits | List total | Population hits | Population total | EASE score |
| Chromosome                                                               | Homo sapiens X                         | 68        | 1243       | 247             | 7342             | 2.82E-05   |
| Chromosome                                                               | Homo sapiens Xp                        | 28        | 1243       | 95              | 7342             | 3.38E-03   |
| Chromosome                                                               | Homo sapiens 18q                       | 25        | 1243       | 82              | 7342             | 3.67E-03   |
| Chromosome                                                               | Homo sapiens Xq                        | 40        | 1243       | 152             | 7342             | 3.81E-03   |
| Chromosome                                                               | Homo sapiens 5p                        | 20        | 1243       | 62              | 7342             | 5.36E-03   |
| KEGG pathway                                                             | Signal Transduction                    | 20        | 109        | 98              | 952              | 9.45E-03   |
| Chromosome                                                               | Homo sapiens 10p                       | 19        | 1243       | 63              | 7342             | 1.43E-02   |
| KEGG pathway                                                             | Phosphatidylinositol signaling systems | 17        | 109        | 81              | 952              | 1.45E-02   |
| Chromosome                                                               | Homo sapiens 17                        | 89        | 1243       | 432             | 7342             | 3.03E-02   |
| Chromosome                                                               | Homo sapiens 18                        | 30        | 1243       | 122             | 7342             | 3.16E-02   |
| KEGG pathway                                                             | D-Glutamine and D-glutamate metabolism | 3         | 109        | 3               | 952              | 3.54E-02   |
| Chromosome                                                               | Homo sapiens 14q                       | 56        | 1243       | 259             | 7342             | 3.84E-02   |
| Chromosome                                                               | Homo sapiens 14                        | 56        | 1243       | 259             | 7342             | 3.84E-02   |
| Chromosome                                                               | Homo sapiens 6                         | 83        | 1243       | 405             | 7342             | 4.05E-02   |
| GenMAPP pathway                                                          | G Protein Signaling                    | 11        | 87         | 41              | 625              | 4.20E-02   |
| Up in T cell ALL vs. normal cells (NBM and purified hematopoietic cells) |                                        |           |            |                 |                  |            |
| System                                                                   | Gene category                          | List hits | List total | Population hits | Population total | EASE score |
| KEGG pathway                                                             | Carbohydrate metabolism                | 16        | 74         | 98              | 917              | 6.99E-03   |
| Chromosome                                                               | Homo sapiens 9q                        | 34        | 716        | 211             | 7049             | 7.37E-03   |
| Chromosome                                                               | Homo sapiens 4q                        | 31        | 716        | 188             | 7049             | 7.80E-03   |
| Chromosome                                                               | Homo sapiens 12q                       | 42        | 716        | 277             | 7049             | 8.02E-03   |
| KEGG pathway                                                             | Butanoate metabolism                   | 6         | 74         | 18              | 917              | 1.05E-02   |
| Chromosome                                                               | Homo sapiens 4                         | 40        | 716        | 271             | 7049             | 1.49E-02   |
| BBID pathway                                                             | T cell receptor                        | 4         | 13         | 10              | 201              | 1.55E-02   |
| Chromosome                                                               | Homo sapiens 9                         | 42        | 716        | 289             | 7049             | 1.60E-02   |
| Chromosome                                                               | Homo sapiens 12                        | 52        | 716        | 378             | 7049             | 1.94E-02   |
| GenMAPP pathway                                                          | Cell cycle                             | 9         | 60         | 38              | 608              | 2.30E-02   |
| GenMAPP pathway                                                          | Cell cycle                             | 11        | 60         | 55              | 608              | 3.03E-02   |
| KEGG pathway                                                             | Cell cycle                             | 9         | 74         | 50              | 917              | 3.82E-02   |
| KEGG pathway                                                             | Nucleotide metabolism                  | 12        | 74         | 80              | 917              | 4.41E-02   |

Up in *TCF3/PBX1* vs. the remaining B lineage ALLs

| System          | Gene category                               | List hits | List total | Population hits | Population total | EASE score |
|-----------------|---------------------------------------------|-----------|------------|-----------------|------------------|------------|
| Chromosome      | Homo sapiens 1q                             | 35        | 309        | 338             | 6904             | 5.83E-06   |
| Chromosome      | Homo sapiens 1                              | 52        | 309        | 707             | 6904             | 3.14E-04   |
| GenMAPP pathway | Cell cycle                                  | 9         | 31         | 56              | 593              | 4.31E-03   |
| Chromosome      | Homo sapiens 7p                             | 13        | 309        | 119             | 6904             | 6.58E-03   |
| GenMAPP pathway | Apoptosis                                   | 5         | 31         | 24              | 593              | 2.79E-02   |
| Chromosome      | Homo sapiens 16                             | 21        | 309        | 285             | 6904             | 2.92E-02   |
| GenMAPP pathway | Cell cycle                                  | 6         | 31         | 38              | 593              | 3.60E-02   |
| KEGG pathway    | Valine, leucine, and isoleucine degradation | 5         | 53         | 24              | 893              | 4.56E-02   |

*IGH@/MYC* vs. the remaining B lineage ALLs

| System       | Gene category         | List hits | List total | Population hits | Population total | EASE score |
|--------------|-----------------------|-----------|------------|-----------------|------------------|------------|
| KEGG pathway | Amino acid metabolism | 9         | 22         | 129             | 893              | 5.98E-03   |

*ETV6/RUNX1* vs. the remaining B lineage ALLs

| System          | Gene category                         | List hits | List total | Population hits | Population total | EASE score |
|-----------------|---------------------------------------|-----------|------------|-----------------|------------------|------------|
| Chromosome      | Homo sapiens 15q                      | 25        | 385        | 221             | 6904             | 1.19E-03   |
| Chromosome      | Homo sapiens 15                       | 25        | 385        | 223             | 6904             | 1.35E-03   |
| Chromosome      | Homo sapiens 16                       | 28        | 385        | 285             | 6904             | 4.40E-03   |
| Chromosome      | Homo sapiens 20                       | 19        | 385        | 173             | 6904             | 7.39E-03   |
| KEGG pathway    | Phosphatidylinositol signaling system | 10        | 49         | 75              | 893              | 1.45E-02   |
| GenMAPP pathway | Calcium channels                      | 3         | 26         | 5               | 593              | 1.58E-02   |
| Chromosome      | Homo sapiens 16p                      | 15        | 385        | 151             | 6904             | 4.09E-02   |
| Chromosome      | Homo sapiens 9                        | 24        | 385        | 283             | 6904             | 4.22E-02   |
| KEGG pathway    | Signal transduction                   | 10        | 49         | 91              | 893              | 4.63E-02   |

## Hyperdiploid &gt;50 chromosomes vs. the remaining B lineage ALLs

| System     | Gene category    | List hits | List total | Population hits | Population total | EASE score |
|------------|------------------|-----------|------------|-----------------|------------------|------------|
| Chromosome | Homo sapiens X   | 111       | 441        | 234             | 6904             | 4.72E-72   |
| Chromosome | Homo sapiens Xq  | 69        | 441        | 141             | 6904             | 8.79E-45   |
| Chromosome | Homo sapiens Xp  | 42        | 441        | 93              | 6904             | 3.19E-25   |
| Chromosome | Homo sapiens 21  | 29        | 441        | 88              | 6904             | 2.97E-13   |
| Chromosome | Homo sapiens 21q | 29        | 441        | 88              | 6904             | 2.97E-13   |
| Chromosome | Homo sapiens 14  | 44        | 441        | 250             | 6904             | 1.25E-09   |
| Chromosome | Homo sapiens 14q | 44        | 441        | 250             | 6904             | 1.25E-09   |
| Chromosome | Homo sapiens 6q  | 22        | 441        | 157             | 6904             | 9.19E-04   |
| Chromosome | Homo sapiens 10  | 31        | 441        | 274             | 6904             | 2.37E-03   |
| Chromosome | Homo sapiens 10q | 25        | 441        | 217             | 6904             | 5.53E-03   |
| Chromosome | Homo sapiens 6   | 37        | 441        | 385             | 6904             | 1.22E-02   |
| Chromosome | Homo sapiens 4   | 25        | 441        | 260             | 6904             | 4.18E-02   |

*MLL* vs. the remaining B lineage ALLs

| System     | Gene category   | List hits | List total | Population hits | Population total | EASE score |
|------------|-----------------|-----------|------------|-----------------|------------------|------------|
| Chromosome | Homo sapiens 4  | 7         | 48         | 260             | 6904             | 7.91E-03   |
| Chromosome | Homo sapiens 4p | 4         | 48         | 87              | 6904             | 2.10E-02   |

---

*MLL vs. the remaining AMLs*

---

| System     | Gene category    | List hits | List total | Population hits | Population total | EASE score |
|------------|------------------|-----------|------------|-----------------|------------------|------------|
| Chromosome | Homo sapiens 10q | 5         | 49         | 180             | 5619             | 6.65E-02   |

---

*MLL vs. the remaining B lineage ALLs and AMLs*

---

No enriched categories

---
