# Supplementary material
Source: PubMed Central journal article supplement (PMC1323166)
Supplement: pnas_0506637102_31.pdf [file pnas_0506637102_31.pdf]

**Table 32. Significantly enriched pathway categories from analysis of the down-regulated genes**

| AML vs. normal cells (NBM and purified hematopoietic cells)           |                                     |           |            |                 |                  |            |
|-----------------------------------------------------------------------|-------------------------------------|-----------|------------|-----------------|------------------|------------|
| System                                                                | Gene category                       | List hits | List total | Population hits | Population total | EASE score |
| Chromosome                                                            | Homo sapiens 5                      | 29        | 382        | 323             | 6800             | 1.35E-02   |
| Chromosome                                                            | Homo sapiens 5q                     | 25        | 382        | 271             | 6800             | 1.68E-02   |
| KEGG pathway                                                          | Complement andcoagulation cascades  | 5         | 42         | 25              | 900              | 2.34E-02   |
| KEGG pathway                                                          | Immune system                       | 5         | 42         | 25              | 900              | 2.34E-02   |
| B lineage ALL vs. normal cells (NBM and purified hematopoietic cells) |                                     |           |            |                 |                  |            |
| System                                                                | Gene category                       | List hits | List total | Population hits | Population total | EASE score |
| KEGG pathway                                                          | Metabolism of complex lipids        | 44        | 249        | 114             | 952              | 2.33E-03   |
| Chromosome                                                            | Homo sapiens 11                     | 107       | 1511       | 413             | 7342             | 5.84E-03   |
| KEGG pathway                                                          | Immune system                       | 13        | 249        | 25              | 952              | 1.39E-02   |
| KEGG pathway                                                          | Complement andcoagulation cascades  | 13        | 249        | 25              | 952              | 1.39E-02   |
| Chromosome                                                            | Homo sapiens 11q                    | 75        | 1511       | 285             | 7342             | 1.47E-02   |
| KEGG pathway                                                          | Oxidative phosphorylation           | 26        | 249        | 67              | 952              | 2.36E-02   |
| KEGG pathway                                                          | Histidine metabolism                | 8         | 249        | 13              | 952              | 2.93E-02   |
| Chromosome                                                            | Homo sapiens 19                     | 96        | 1511       | 389             | 7342             | 3.27E-02   |
| Chromosome                                                            | Homo sapiens 3q                     | 56        | 1511       | 213             | 7342             | 3.54E-02   |
| T cell ALL vs. normal cells (NBM and purified hematopoietic cells)    |                                     |           |            |                 |                  |            |
| System                                                                | Gene category                       | List hits | List total | Population hits | Population total | EASE score |
| KEGG pathway                                                          | Neurodegenerative disorders         | 19        | 128        | 65              | 917              | 1.74E-03   |
| Chromosome                                                            | Homo sapiens 6                      | 67        | 858        | 398             | 7049             | 4.57E-03   |
| GenMAPP pathway                                                       | TGF beta signaling pathway          | 9         | 71         | 27              | 608              | 7.59E-03   |
| KEGG pathway                                                          | Alzheimer's disease                 | 8         | 128        | 20              | 917              | 1.35E-02   |
| KEGG pathway                                                          | Immune system                       | 8         | 128        | 24              | 917              | 3.73E-02   |
| KEGG pathway                                                          | Complement andcoagulation cascades  | 8         | 128        | 24              | 917              | 3.73E-02   |
| Chromosome                                                            | Homo sapiens 6q                     | 28        | 858        | 159             | 7049             | 4.38E-02   |
| Chromosome                                                            | Homo sapiens 6p                     | 39        | 858        | 238             | 7049             | 4.57E-02   |
| <i>TCF3/PBX1</i> vs. the remaining B lineage ALLs                     |                                     |           |            |                 |                  |            |
| System                                                                | Gene category                       | List hits | List total | Population hits | Population total | EASE score |
| Chromosome                                                            | Homo sapiens X                      | 21        | 196        | 234             | 6904             | 8.56E-06   |
| Chromosome                                                            | Homo sapiens Xq                     | 14        | 196        | 141             | 6904             | 1.62E-04   |
| GenMAPP pathway                                                       | G Protein signaling                 | 6         | 19         | 38              | 593              | 3.84E-03   |
| KEGG pathway                                                          | Metabolism of complex carbohydrates | 7         | 26         | 64              | 893              | 6.43E-03   |
| KEGG pathway                                                          | Glycosaminoglycandegradation        | 3         | 26         | 6               | 893              | 1.05E-02   |
| Chromosome                                                            | Homo sapiens 12p                    | 8         | 196        | 98              | 6904             | 2.05E-02   |
| GenMAPP pathway                                                       | GPCRs, Class A rhodopsin-like       | 4         | 19         | 22              | 593              | 2.52E-02   |
| Chromosome                                                            | Homo sapiens 4                      | 14        | 196        | 260             | 6904             | 3.22E-02   |

|            |                 |   |     |    |      |          |
|------------|-----------------|---|-----|----|------|----------|
| Chromosome | Homo sapiens Xp | 7 | 196 | 93 | 6904 | 4.73E-02 |
|------------|-----------------|---|-----|----|------|----------|

---

*IGH@MYC* vs. the remaining B lineage ALLs

---

| System       | Gene category               | List hits | List total | Population hits | Population total | EASE score |
|--------------|-----------------------------|-----------|------------|-----------------|------------------|------------|
| Chromosome   | Homo sapiens 21q            | 8         | 200        | 88              | 6904             | 1.32E-02   |
| Chromosome   | Homo sapiens 21             | 8         | 200        | 88              | 6904             | 1.32E-02   |
| KEGG pathway | Neurodegenerative disorders | 6         | 22         | 65              | 893              | 1.43E-02   |
| Chromosome   | Homo sapiens Xq             | 10        | 200        | 141             | 6904             | 2.03E-02   |

---

*ETV6/RUNX1* vs. the remaining B lineage ALLs

---

| System       | Gene category         | List hits | List total | Population hits | Population total | EASE score |
|--------------|-----------------------|-----------|------------|-----------------|------------------|------------|
| Chromosome   | Homo sapiens X        | 28        | 285        | 234             | 6904             | 9.51E-07   |
| Chromosome   | Homo sapiens Xp       | 17        | 285        | 93              | 6904             | 9.59E-07   |
| Chromosome   | Homo sapiens 10q      | 20        | 285        | 217             | 6904             | 1.45E-03   |
| Chromosome   | Homo sapiens 6q       | 16        | 285        | 157             | 6904             | 1.94E-03   |
| Chromosome   | Homo sapiens 10       | 21        | 285        | 274             | 6904             | 8.84E-03   |
| KEGG pathway | Purine metabolism     | 9         | 50         | 59              | 893              | 1.18E-02   |
| KEGG pathway | Pyrimidine metabolism | 7         | 50         | 39              | 893              | 1.63E-02   |
| KEGG pathway | Nucleotide metabolism | 10        | 50         | 78              | 893              | 2.12E-02   |
| Chromosome   | Homo sapiens 4        | 18        | 285        | 260             | 6904             | 3.90E-02   |
| Chromosome   | Homo sapiens 6        | 24        | 285        | 385             | 6904             | 4.47E-02   |

---

Hyperdiploid >50 vs. the remaining B lineage ALLs

---

| System       | Gene category       | List hits | List total | Population hits | Population total | EASE score |
|--------------|---------------------|-----------|------------|-----------------|------------------|------------|
| Chromosome   | Homo sapiens 16     | 27        | 270        | 285             | 6904             | 4.09E-05   |
| Chromosome   | Homo sapiens 16q    | 15        | 270        | 133             | 6904             | 6.32E-04   |
| Chromosome   | Homo sapiens 13     | 13        | 270        | 134             | 6904             | 5.85E-03   |
| Chromosome   | Homo sapiens 13q    | 13        | 270        | 134             | 6904             | 5.85E-03   |
| Chromosome   | Homo sapiens 2p     | 16        | 270        | 198             | 6904             | 1.02E-02   |
| KEGG pathway | Signal transduction | 9         | 36         | 91              | 893              | 1.98E-02   |
| Chromosome   | Homo sapiens 1      | 38        | 270        | 707             | 6904             | 3.71E-02   |

---

*MLL* vs. the remaining B lineage ALLs

---

| System       | Gene category               | List hits | List total | Population hits | Population total | EASE score |
|--------------|-----------------------------|-----------|------------|-----------------|------------------|------------|
| KEGG pathway | Neurodegenerative DISORDERS | 3         | 5          | 65              | 893              | 2.85E-02   |

---

*MLL* vs. the remaining AMLs

---

No enriched categories

---

*MLL* vs. the remaining B lineage ALLs and AMLs

---

No enriched categories

---
