# Supplementary material
Source: PubMed Central journal article supplement (PMC1323166)
Supplement: pnas_0506637102_32.pdf [file pnas_0506637102_32.pdf]

**Table 33. Classification accuracies obtained by using  $k$ -NN to predict genetic subtype among the B lineage ALLs**

| Class                        | No of samples | No. misclassified | Apparent accuracy | Sensitivity | Specificity |
|------------------------------|---------------|-------------------|-------------------|-------------|-------------|
| <i>TCF3/PBX1</i>             | 6             | 0                 | 100               | 100         | 100         |
| Hyperdiploid >50 chromosomes | 29            | 0                 | 100               | 100         | 100         |
| <i>ETV6/RUNX1</i>            | 20            | 1                 | 95                | 95          | 97.1        |

Apparent accuracy was determined by leave-one-out crossvalidation.

Sensitivity = the number of positive samples predicted/the number of true positives

Specificity = the number of negative samples predicted/the number of true negatives
