# Supplementary material
Source: PubMed Central journal article supplement (PMC1323166)
Supplement: pnas_0506637102_33.pdf [file pnas_0506637102_33.pdf]

**Table 34. Genes used for supervised classification of genetic subtype in B lineage ALL**

| Accession no. | Gene name                                                                                             | Gene symbol               | Entrez gene  | Reporter ID | No. of times used for classification | Class        |
|---------------|-------------------------------------------------------------------------------------------------------|---------------------------|--------------|-------------|--------------------------------------|--------------|
| R78776        | Protein tyrosine phosphatase, receptor type, K                                                        | <i>PTPRK</i>              | 5796         | 146123      | 55                                   | ETV6RUNX1    |
| R28188        | Transcribed locus                                                                                     | <i>0</i>                  | 0            | 134658      | 55                                   | TCF3PBX1     |
| AA621510      | Zinc finger protein 219                                                                               | <i>ZNF219</i>             | 51222        | 1055297     | 55                                   | Hyperdiploid |
| H59805        | IGF-II mRNA-binding protein 1                                                                         | <i>IMP-1</i>              | 10642        | 208078      | 55                                   | ETV6RUNX1    |
| AA401304      | Pre-B cell leukemia transcription factor 1                                                            | <i>PBX1</i>               | 5087         | 741880      | 55                                   | TCF3PBX1     |
| H23561        | Deltex homolog 1 (Drosophila)                                                                         | <i>DTX1</i>               | 1840         | 52120       | 54                                   | Hyperdiploid |
| AA188661      | SH3-domain binding protein 5 (BTK-associated)                                                         | <i>SH3BP5</i>             | 9467         | 626343      | 53                                   | Hyperdiploid |
| H23443        | Family with sequence similarity 19 (chemokine (C-C motif)-like), member A1                            | <i>FAM19A1</i>            | 407738       | 51993       | 52                                   | ETV6RUNX1    |
| AA007619      | Multiple cluster hits:196177 & 445097                                                                 | <i>PHKG2 &amp; SRCAP</i>  | 5261 & 10847 | 429446      | 52                                   | TCF3PBX1     |
| R98407        | Pre-B cell leukemia transcription factor 1                                                            | <i>PBX1</i>               | 5087         | 200656      | 52                                   | TCF3PBX1     |
| R67222        | Chromosome 6 open reading frame 192                                                                   | <i>C6orf192</i>           | 116843       | 140852      | 52                                   | Hyperdiploid |
| AA460143      | Glucosamine-6-phosphate deaminase 1                                                                   | <i>GNPDA1</i>             | 10007        | 795882      | 52                                   | ETV6RUNX1    |
| AA464528      | Proteolipid protein 2 (colonic epithelium-enriched)                                                   | <i>PLP2</i>               | 5355         | 810504      | 52                                   | Hyperdiploid |
| A1364369      | Pre-B cell leukemia transcription factor 1                                                            | <i>PBX1</i>               | 5087         | 2018074     | 52                                   | TCF3PBX1     |
| R67704        | Neuritin 1                                                                                            | <i>NRN1</i>               | 51299        | 140197      | 52                                   | ETV6RUNX1    |
| R67704        | Neuritin 1                                                                                            | <i>NRN1</i>               | 51299        | 140197      | 52                                   | Hyperdiploid |
| AA989257      | SH3-domain kinase binding protein 1                                                                   | <i>SH3KBP1</i>            | 30011        | 1604005     | 52                                   | Hyperdiploid |
| AA705153      | Hypothetical protein FLJ10357                                                                         | <i>FLJ10357</i>           | 55701        | 461613      | 52                                   | Hyperdiploid |
| N51740        | Ectonucleotide pyrophosphatase/phosphodiesterase 4 (putative function)                                | <i>ENPP4</i>              | 22875        | 281737      | 52                                   | ETV6RUNX1    |
| AA496796      | FERM, RhoGEF (ARHGEF) and pleckstrin domain protein 1 (chondrocyte-derived)                           | <i>FARP1</i>              | 10160        | 897656      | 52                                   | ETV6RUNX1    |
| A1698719      | Myeloid/lymphoid or mixed-lineage leukemia 2 Adenosine deaminase, RNA-specific, B1 (RED1 homolog rat) | <i>MLL2</i>               | 8085         | 2302544     | 51                                   | TCF3PBX1     |
| AA489331      | Formin homology 2 domain containing 3                                                                 | <i>ADARB1</i>             | 104          | 842939      | 51                                   | TCF3PBX1     |
| H22559        | Formin homology 2 domain containing 3                                                                 | <i>FHOD3</i>              | 80206        | 51807       | 51                                   | TCF3PBX1     |
| AA459589      | Tumor protein p53 inducible nuclear protein 1                                                         | <i>TP53INP1</i>           | 94241        | 814528      | 51                                   | ETV6RUNX1    |
| AA394127      | Nuclear factor of activated T cells, cytoplasmic, calcineurin-dependent 4                             | <i>NFATC4</i>             | 4776         | 725649      | 51                                   | TCF3PBX1     |
| AA490494      | Tumor necrosis factor receptor superfamily, member 21                                                 | <i>TNFRSF21</i>           | 27242        | 823902      | 51                                   | ETV6RUNX1    |
| BX101090      | Bone morphogenetic protein 2                                                                          | <i>BMP2</i>               | 650          | 359610      | 51                                   | TCF3PBX1     |
| CR742982      | 257761 & 410969                                                                                       | <i>SH3BP5 &amp; NTRK3</i> | 9467 & 4916  | 35356       | 49                                   | Hyperdiploid |
| AA496796      | FERM, RhoGEF (ARHGEF) and pleckstrin domain protein 1 (chondrocyte-derived)                           | <i>FARP1</i>              | 10160        | 897656      | 48                                   | Hyperdiploid |
| BX114269      | Chromodomain helicase DNA binding protein 2                                                           | <i>CHD2</i>               | 1106         | 137211      | 45                                   | ETV6RUNX1    |
| BX113274      | CDNA: FLJ22994 fis, clone KAT11918                                                                    | <i>0</i>                  | 0            | 823853      | 44                                   | Hyperdiploid |
| AA482326      | Leucine zipper, down-regulated in cancer 1-like                                                       | <i>LDOC1L</i>             | 84247        | 840884      | 44                                   | Hyperdiploid |
| N49774        | KIAA1671 protein                                                                                      | <i>KIAA1671</i>           | 85379        | 282404      | 43                                   | ETV6RUNX1    |
| H18864        | Notch homolog 1, translocation-associated (Drosophila)                                                | <i>NOTCH1</i>             | 4851         | 51275       | 43                                   | ETV6RUNX1    |
| AA287218      | Glycoprotein M6B                                                                                      | <i>GPM6B</i>              | 2824         | 713660      | 43                                   | ETV6RUNX1    |
| AA706929      | Protein phosphatase 1F (PP2C domain containing)                                                       | <i>PPM1F</i>              | 9647         | 451855      | 42                                   | Hyperdiploid |
| AA151486      | Phosphoribosyl pyrophosphate synthetase 2                                                             | <i>PRPS2</i>              | 5634         | 503097      | 42                                   | ETV6RUNX1    |
| AA150060      | 409081 & 534399                                                                                       | <i>KMO &amp; OPN3</i>     | 8564 & 23596 | 504461      | 41                                   | TCF3PBX1     |
| AA045399      | Hypothetical protein LOC162073                                                                        | <i>LOC162073</i>          | 162073       | 487831      | 41                                   | Hyperdiploid |
| BX099314      | Chemokine-like factor super family 7                                                                  | <i>CKLFSF7</i>            | 112616       | 810002      | 41                                   | TCF3PBX1     |
| N63057        | Protocadherin 9                                                                                       | <i>PCDH9</i>              | 5101         | 284714      | 41                                   | Hyperdiploid |
| BX094146      | Elongation factor RNA polymerase II-like 3                                                            | <i>ELL3</i>               | 80237        | 795427      | 41                                   | ETV6RUNX1    |
| A1871665      | Acetyl-Coenzyme A acetyltransferase 1 (acetoacetyl Coenzyme A thiolase)                               | <i>ACAT1</i>              | 38           | 2292807     | 41                                   | Hyperdiploid |
| AA043083      | SH3-domain kinase binding protein 1                                                                   | <i>SH3KBP1</i>            | 30011        | 486036      | 41                                   | Hyperdiploid |
| R02269        | D4, zinc and double PHD fingers, family 3                                                             | <i>DPF3</i>               | 8110         | 124530      | 41                                   | ETV6RUNX1    |

|          |                                                                             |                            |               |         |    |              |
|----------|-----------------------------------------------------------------------------|----------------------------|---------------|---------|----|--------------|
| AA976212 | Myeloid-associated differentiation marker                                   | <i>MYADM</i>               | 91663         | 1567676 | 41 | ETV6RUNX1    |
| W02963   | Fe receptor-like and mucin-like 1                                           | <i>FREB</i>                | 84824         | 291871  | 41 | TCF3PBX1     |
| T53169   | KIAA2002 protein                                                            | <i>KIAA2002</i>            | 79834         | 68534   | 41 | TCF3PBX1     |
| BX109808 | Calneuron 1                                                                 | <i>CALN1</i>               | 83698         | 27916   | 41 | ETV6RUNX1    |
| AA428394 | HtrA serine peptidase 3                                                     | <i>HTRA3</i>               | 94031         | 773558  | 41 | TCF3PBX1     |
| AA999901 | Guanine nucleotide binding protein (G protein), gamma 11                    | <i>GNG11</i>               | 2791          | 1636447 | 41 | ETV6RUNX1    |
| AA504431 | Phosphatidylinositol 3,4,5-trisphosphate-dependent RAC exchanger 1          | <i>PREX1</i>               | 57580         | 825270  | 41 | TCF3PBX1     |
| AA486239 | Filamin B, beta (actin binding protein 278)                                 | <i>FLNB</i>                | 2317          | 840818  | 41 | Hyperdiploid |
| AA825491 | Interferon regulatory factor 4                                              | <i>IRF4</i>                | 3662          | 1358229 | 41 | TCF3PBX1     |
| AA197344 | Phosphoribosyl pyrophosphate synthetase 2                                   | <i>PRPS2</i>               | 5634          | 627688  | 41 | ETV6RUNX1    |
| N58609   | Chemokine orphan receptor 1                                                 | <i>CMKOR1</i>              | 57007         | 246786  | 40 | TCF3PBX1     |
| AA946776 | Fibroblast growth factor 9 (glia-activating factor)                         | <i>FGF9</i>                | 2254          | 1589786 | 40 | TCF3PBX1     |
| AA621510 | Zinc finger protein 219                                                     | <i>ZNF219</i>              | 51222         | 1055297 | 40 | ETV6RUNX1    |
| AA426027 | Sorting nexin 3                                                             | <i>SNX3</i>                | 8724          | 757225  | 40 | TCF3PBX1     |
| AA504303 | 435933 & 495960                                                             | <i>PHF10 &amp; ATP6AP2</i> | 55274 & 10159 | 825076  | 40 | Hyperdiploid |
| AA704802 | Neuroigin 2                                                                 | <i>NLGN2</i>               | 57555         | 452466  | 40 | ETV6RUNX1    |
| AA056375 | Hypothetical protein from clone 643                                         | <i>LOC57228</i>            | 57228         | 509458  | 40 | TCF3PBX1     |
| AA428001 | Tyrosine kinase, non-receptor, 2                                            | <i>TNK2</i>                | 10188         | 773478  | 39 | TCF3PBX1     |
| AA009593 | Membrane protein, palmitoylated 7 (MAGUK p55 subfamily member 7)            | <i>MPP7</i>                | 143098        | 365517  | 39 | TCF3PBX1     |
| AA917731 | RAB3A interacting protein (rabin3)                                          | <i>RAB3IP</i>              | 117177        | 1527297 | 38 | Hyperdiploid |
| H98981   | Myeloid-associated differentiation marker                                   | <i>MYADM</i>               | 91663         | 261444  | 38 | ETV6RUNX1    |
| AA453028 | Stromal antigen 3                                                           | <i>MGC2463</i>             | 79037         | 788355  | 38 | TCF3PBX1     |
| AA425618 | Immunoglobulin superfamily, member 3                                        | <i>IGSF3</i>               | 3321          | 773335  | 38 | TCF3PBX1     |
| AI983274 | ATPase, H <sup>+</sup> transporting, lysosomal accessory protein 2          | <i>ATP6AP2</i>             | 10159         | 2517344 | 37 | Hyperdiploid |
| AA906438 | Transmembrane protein 44                                                    | <i>LOC93109</i>            | 93109         | 1505998 | 37 | Hyperdiploid |
| H09164   | FERM, RhoGEF (ARHGEF) and pleckstrin domain protein 1 (chondrocyte-derived) | <i>FARP1</i>               | 10160         | 46411   | 37 | ETV6RUNX1    |
| AI969458 | Ribosomal protein S6 kinase, 90kDa, polypeptide 3                           | <i>RPS6KA3</i>             | 6197          | 2563099 | 36 | Hyperdiploid |
| AI245605 | D-aspartate oxidase                                                         | <i>DDO</i>                 | 8528          | 1870049 | 36 | Hyperdiploid |
| R05810   | Splicing factor, arginine/serine-rich 4                                     | <i>SFRS4</i>               | 6429          | 125311  | 36 | ETV6RUNX1    |
| H15115   | Kazrin                                                                      | <i>KIAA1026</i>            | 23254         | 49569   | 35 | Hyperdiploid |
| H48661   | Glucosamine-6-phosphate deaminase 1                                         | <i>GNPDA1</i>              | 10007         | 207082  | 34 | ETV6RUNX1    |
| BX099233 | Down syndrome critical region gene 5                                        | <i>DSCR5</i>               | 51227         | 785642  | 33 | Hyperdiploid |
| AA410567 | Interferon-induced protein 44-like                                          | <i>IFI44L</i>              | 10964         | 754479  | 32 | TCF3PBX1     |
| BX100679 | FYN binding protein (FYB 120/130)                                           | <i>FYB</i>                 | 2533          | 293325  | 32 | ETV6RUNX1    |
| R02269   | D4, zinc and double PHD fingers, family 3                                   | <i>DPF3</i>                | 8110          | 124530  | 30 | Hyperdiploid |
| R89905   | Ubiquitin specific protease 9, X-linked (fat facets-like, Drosophila)       | <i>USP9X</i>               | 8239          | 194706  | 30 | Hyperdiploid |
| AA278240 | Haloacid dehalogenase-like hydrolase domain containing 1A                   | <i>HDHD1A</i>              | 8226          | 703479  | 30 | Hyperdiploid |
| AA670359 | Rho GTPase activating protein 24                                            | <i>ARHGAP24</i>            | 83478         | 878417  | 30 | ETV6RUNX1    |
| AA521439 | Synaptotagmin-like 2                                                        | <i>SYTL2</i>               | 54843         | 826194  | 30 | ETV6RUNX1    |
| BX116983 | CD1C antigen, c polypeptide                                                 | <i>CD1C</i>                | 911           | 428103  | 29 | Hyperdiploid |
| AA701976 | Inositol 1,4,5-triphosphate receptor, type 3                                | <i>ITPR3</i>               | 3710          | 435953  | 29 | Hyperdiploid |
| AA454756 | SH3-binding domain kinase 1                                                 | <i>SBK1</i>                | 388228        | 809789  | 29 | Hyperdiploid |
| AI948893 | SH3-domain binding protein 2                                                | <i>SH3BP2</i>              | 6452          | 2471503 | 29 | Hyperdiploid |
| AI349234 | Family with sequence similarity 26, member B                                | <i>FAM26B</i>              | 51063         | 2049813 | 29 | Hyperdiploid |
| AI362933 | Death-associated protein kinase 2                                           | <i>DAPK2</i>               | 23604         | 2018423 | 29 | ETV6RUNX1    |
| AA928142 | Porcupine homolog (Drosophila)                                              | <i>PORCN</i>               | 64840         | 1541827 | 29 | Hyperdiploid |
| AA426237 | Ubiquitin specific protease 9, X-linked (fat facets-like, Drosophila)       | <i>USP9X</i>               | 8239          | 760231  | 29 | Hyperdiploid |
| AA447746 | DNA-damage-inducible transcript 4                                           | <i>DDIT4</i>               | 54541         | 813645  | 29 | Hyperdiploid |

|          |                                                                                                        |                             |               |         |    |              |
|----------|--------------------------------------------------------------------------------------------------------|-----------------------------|---------------|---------|----|--------------|
| AA406353 | Programmed cell death 6                                                                                | <i>PDCD6</i>                | 10016         | 753193  | 29 | TCF3PBX1     |
| AA412053 | CD9 antigen (p24)                                                                                      | <i>CD9</i>                  | 928           | 727251  | 29 | ETV6RUNX1    |
| AA669443 | Eukaryotic translation initiation factor 5                                                             | <i>EIF5</i>                 | 1983          | 884867  | 28 | Hyperdiploid |
| T66109   | Core-binding factor, runt domain, alpha subunit 2; translocated to, 3                                  | <i>CBFA2T3</i>              | 863           | 21684   | 28 | ETV6RUNX1    |
| N23340   | Hypothetical protein LOC152485                                                                         | <i>LOC152485</i>            | 152485        | 267186  | 28 | ETV6RUNX1    |
| AA099236 | Myeloid-associated differentiation marker                                                              | <i>MYADM</i>                | 91663         | 489495  | 28 | ETV6RUNX1    |
| BX096523 | Uronyl-2-sulfotransferase                                                                              | <i>UST</i>                  | 10090         | 505335  | 28 | TCF3PBX1     |
| AA131530 | A kinase (PRKA) anchor protein 14                                                                      | <i>AKAP14</i>               | 158798        | 503725  | 28 | ETV6RUNX1    |
| BX113672 | Similar to BMP2 inducible kinase                                                                       | <i>0</i>                    | 388957        | 243524  | 28 | ETV6RUNX1    |
| AI611956 | Immunoglobulin lambda-like polypeptide 1                                                               | <i>IGLL1</i>                | 3543          | 2245295 | 28 | TCF3PBX1     |
| AI652019 | MAD2 mitotic arrest deficienT like 2 (yeast)                                                           | <i>MAD2L2</i>               | 10459         | 2306860 | 28 | TCF3PBX1     |
| AA677662 | Hypothetical protein MGC35440                                                                          | <i>LOC147991</i>            | 147991        | 460440  | 28 | Hyperdiploid |
| AI628353 | KIAA0882 protein                                                                                       | <i>KIAA0882</i>             | 23158         | 2284924 | 28 | TCF3PBX1     |
| W04283   | 132340 & 389724                                                                                        | <i>C6orf85 &amp; IF144L</i> | 63027 & 10964 | 295939  | 28 | TCF3PBX1     |
| T53169   | KIAA2002 protein                                                                                       | <i>KIAA2002</i>             | 79834         | 68534   | 28 | ETV6RUNX1    |
| AA699589 | Myeloid-associated differentiation marker                                                              | <i>MYADM</i>                | 91663         | 433491  | 28 | ETV6RUNX1    |
| AA629903 | Hypothetical protein LOC143458                                                                         | <i>LOC143458</i>            | 143458        | 884662  | 28 | TCF3PBX1     |
| R45256   | D4, zinc and double PHD fingers, family 3                                                              | <i>DPF3</i>                 | 8110          | 23025   | 28 | ETV6RUNX1    |
| AA708152 | Transmembrane emp24 protein transport domain containing 6                                              | <i>TMED6</i>                | 146456        | 460798  | 28 | TCF3PBX1     |
| AA486239 | Filamin B, beta (actin binding protein 278)                                                            | <i>FLNB</i>                 | 2317          | 840818  | 28 | ETV6RUNX1    |
| AA782314 | Hypothetical protein MGC35440                                                                          | <i>LOC147991</i>            | 147991        | 857574  | 28 | ETV6RUNX1    |
| AA663941 | LOC387882 hypothetical protein                                                                         | <i>LOC387882</i>            | 387882        | 855707  | 28 | ETV6RUNX1    |
| AA504303 | 435933 & 495960                                                                                        | <i>PHF10 &amp; ATP6AP2</i>  | 55274 & 10159 | 825076  | 28 | TCF3PBX1     |
| AA459909 | 6-pyruvoyl-tetrahydropterin synthase/dimerization cofactor of hepatocyte nuclear factor 1 alpha (TCF1) | <i>PCBD</i>                 | 5092          | 809421  | 28 | TCF3PBX1     |
| AA447661 | Sestrin 1                                                                                              | <i>SESN1</i>                | 27244         | 813584  | 28 | TCF3PBX1     |
| AA489290 | FERM, RhoGEF (ARHGEF) and pleckstrin domain protein 1 (chondrocyte-derived)                            | <i>FARP1</i>                | 10160         | 842918  | 28 | ETV6RUNX1    |
| H09164   | FERM, RhoGEF (ARHGEF) and pleckstrin domain protein 1 (chondrocyte-derived)                            | <i>FARP1</i>                | 10160         | 46411   | 28 | Hyperdiploid |
| N95435   | Putative G protein coupled receptor                                                                    | <i>GPR</i>                  | 11245         | 309929  | 27 | TCF3PBX1     |
| AI401528 | Hypothetical protein MGC34646                                                                          | <i>MGC34646</i>             | 157807        | 2110073 | 27 | Hyperdiploid |
| AI985408 | Solute carrier family 27 (fatty acid transporter), member 2                                            | <i>SLC27A2</i>              | 11001         | 2496336 | 27 | TCF3PBX1     |
| AI015577 | Homolog of yeast INO80                                                                                 | <i>INO80</i>                | 54617         | 1636837 | 27 | TCF3PBX1     |
| N21334   | Abl interactor 2                                                                                       | <i>ABI2</i>                 | 10152         | 265102  | 27 | TCF3PBX1     |
| AA035450 | Inositol 1,4,5-triphosphate receptor, type 1                                                           | <i>ITPR1</i>                | 3708          | 471725  | 27 | ETV6RUNX1    |
| T91261   | Mannosidase, alpha, class 1A, member 1                                                                 | <i>MAN1A1</i>               | 4121          | 112629  | 27 | TCF3PBX1     |
| H12043   | Cytoplasmic FMR1 interacting protein 2                                                                 | <i>CYFIP2</i>               | 26999         | 47475   | 26 | TCF3PBX1     |
| H61901   | Ribosomal protein S6 kinase, 90kDa, polypeptide 3                                                      | <i>RPS6KA3</i>              | 6197          | 204148  | 26 | Hyperdiploid |
| AA490684 | AE binding protein 1                                                                                   | <i>AEBP1</i>                | 165           | 823851  | 26 | TCF3PBX1     |
| AA131701 | Sperm autoantigenic protein 17                                                                         | <i>SPA17</i>                | 53340         | 503866  | 26 | TCF3PBX1     |
| AA866153 | Ceroid-lipofuscinosis, neuronal 6, late infantile, variant                                             | <i>CLN6</i>                 | 54982         | 1469434 | 26 | TCF3PBX1     |
| BX100923 | Cadherin 4, type 1, R-cadherin (retinal)                                                               | <i>CDH4</i>                 | 1002          | 32777   | 26 | ETV6RUNX1    |
| AA887201 | Chromosome 13 open reading frame 1                                                                     | <i>C13orf1</i>              | 57213         | 1501998 | 26 | Hyperdiploid |
| BX103225 | 149156 & 547053                                                                                        | <i>GLDC &amp; 0</i>         | 2731 & 0      | 248261  | 26 | TCF3PBX1     |
| R48131   | 167679 & 434946                                                                                        | <i>SH3BP2 &amp; 0</i>       | 6452 & 0      | 153694  | 25 | Hyperdiploid |
| R78776   | Protein tyrosine phosphatase, receptor type, K                                                         | <i>PTPRK</i>                | 5796          | 146123  | 24 | Hyperdiploid |
| AA936138 | BH3 interacting domain death agonist                                                                   | <i>BID</i>                  | 637           | 1551267 | 24 | Hyperdiploid |
| R20270   | MGC4170 protein                                                                                        | <i>MGC4170</i>              | 79158         | 32801   | 24 | ETV6RUNX1    |
| N50428   | Hypothetical protein FLJ30046                                                                          | <i>FLJ30046</i>             | 122060        | 280640  | 24 | TCF3PBX1     |
| AA046565 | Synaptotagmin-like 2                                                                                   | <i>SYTL2</i>                | 54843         | 487932  | 23 | ETV6RUNX1    |

|          |                                                                                                           |                          |                |         |    |              |
|----------|-----------------------------------------------------------------------------------------------------------|--------------------------|----------------|---------|----|--------------|
| AA458653 | Tribbles homolog 2 (Drosophila)                                                                           | <i>TRIB2</i>             | 28951          | 813426  | 22 | TCF3PBX1     |
| AA670134 | Tetratricopeptide repeat domain 3                                                                         | <i>TTC3</i>              | 7267           | 844725  | 22 | Hyperdiploid |
| R88680   | Hypothetical protein MGC10485                                                                             | <i>MGC10485</i>          | 112936         | 166530  | 21 | TCF3PBX1     |
| BX118964 | Regulating synaptic membrane exocytosis 3                                                                 | <i>RIMS3</i>             | 9783           | 175846  | 21 | TCF3PBX1     |
| BX116655 | Follicular lymphoma variant translocation 1                                                               | <i>FVT1</i>              | 2531           | 233765  | 20 | Hyperdiploid |
| R74255   | Rap2 interacting protein x                                                                                | <i>RIPX</i>              | 22902          | 143310  | 19 | ETV6RUNX1    |
| AI523637 | Protocadherin 9                                                                                           | <i>PCDH9</i>             | 5101           | 2116531 | 19 | Hyperdiploid |
| N62936   | Transcribed locus                                                                                         | <i>0</i>                 | 0              | 278729  | 18 | Hyperdiploid |
| N30348   | Fms-related tyrosine kinase 1 (vascular endothelial growth factor/vascular permeability factor receptor)  | <i>FLT1</i>              | 2321           | 258101  | 18 | Hyperdiploid |
| N21461   | Myosin X                                                                                                  | <i>MYO10</i>             | 4651           | 265840  | 17 | ETV6RUNX1    |
| AI682474 | Nuclear transport factor 2-like export factor 2                                                           | <i>NXT2</i>              | 55916          | 2322396 | 17 | Hyperdiploid |
| R33401   | SAM domain, SH3 domain and nuclear localisation signals, 1                                                | <i>SAMSN1</i>            | 64092          | 136169  | 17 | ETV6RUNX1    |
| BX092408 | S100 calcium binding protein A13                                                                          | <i>S100A13</i>           | 6284           | 325513  | 17 | Hyperdiploid |
| W72201   | SMAD, mothers against DPP homolog 3 (Drosophila)                                                          | <i>SMAD3</i>             | 4088           | 345935  | 16 | ETV6RUNX1    |
| AI349234 | Family with sequence similarity 26, member B                                                              | <i>FAM26B</i>            | 51063          | 2049813 | 16 | ETV6RUNX1    |
| BX099263 | Prominin 1                                                                                                | <i>PROM1</i>             | 8842           | 27544   | 16 | Hyperdiploid |
| AI808234 | Zinc finger protein 177                                                                                   | <i>ZNF177</i>            | 7730           | 2363207 | 15 | ETV6RUNX1    |
| W52208   | Coactosin-like 1 (Dictyostelium)                                                                          | <i>COTL1</i>             | 23406          | 325370  | 15 | ETV6RUNX1    |
| N68512   | Hermansky-Pudlak syndrome 4                                                                               | <i>HPS4</i>              | 89781          | 294089  | 15 | Hyperdiploid |
| AA479102 | Protein kinase C, beta 1                                                                                  | <i>PRKCB1</i>            | 5579           | 753923  | 15 | ETV6RUNX1    |
| AA167328 | Implantation-associated protein                                                                           | <i>DKFZp564K142</i>      | 84061          | 595620  | 15 | Hyperdiploid |
| AA461274 | Transcribed locus, weakly similar to XP_209041.2<br>PREDICTED: similar to KIAA1503 protein [Homo sapiens] | <i>0</i>                 | 0              | 796127  | 15 | ETV6RUNX1    |
| R23083   | Moesin                                                                                                    | <i>MSN</i>               | 4478           | 131362  | 14 | Hyperdiploid |
| AA670144 | Hypoxia-inducible protein 2                                                                               | <i>HIG2</i>              | 29923          | 845658  | 14 | Hyperdiploid |
| AA630138 | Zinc finger protein 185 (LIM domain)                                                                      | <i>ZNF185</i>            | 7739           | 855079  | 14 | Hyperdiploid |
| AA151486 | Phosphoribosyl pyrophosphate synthetase 2                                                                 | <i>PRPS2</i>             | 5634           | 503097  | 14 | Hyperdiploid |
| H95960   | Secreted protein, acidic, cysteine-rich (osteonectin)                                                     | <i>SPARC</i>             | 6678           | 250654  | 13 | ETV6RUNX1    |
| N23340   | Hypothetical protein LOC152485                                                                            | <i>LOC152485</i>         | 152485         | 267186  | 13 | Hyperdiploid |
| N98665   | FYN oncogene related to SRC, FGR, YES                                                                     | <i>FYN</i>               | 2534           | 278501  | 13 | Hyperdiploid |
| AI871665 | Acetyl-Coenzyme A acetyltransferase 1 (acetoacetyl Coenzyme A thiolase)                                   | <i>ACAT1</i>             | 38             | 2292807 | 13 | ETV6RUNX1    |
| AI811492 | Anti-Mullerian hormone                                                                                    | <i>AMH</i>               | 268            | 2262455 | 13 | TCF3PBX1     |
| T51359   | G protein-coupled receptor kinase 5                                                                       | <i>GRK5</i>              | 2869           | 70120   | 13 | ETV6RUNX1    |
| AA680132 | Sphingomyelin phosphodiesterase 2, neutral membrane (neutral sphingomyelinase)                            | <i>SMPD2</i>             | 6610           | 433170  | 13 | ETV6RUNX1    |
| AA292215 | Zinc finger and BTB domain containing 34                                                                  | <i>ZBTB34</i>            | 403341         | 725745  | 13 | ETV6RUNX1    |
| R59936   | Potassium inwardly-rectifying channel, subfamily J, member 6                                              | <i>KCNJ6</i>             | 3763           | 43101   | 13 | Hyperdiploid |
| H85272   | Rab9 effector protein with kelch motifs                                                                   | <i>RAB9P40</i>           | 10244          | 249606  | 12 | TCF3PBX1     |
| BX111856 | Phytanoyl-CoA hydroxylase (Refsum disease)                                                                | <i>PHYH</i>              | 5264           | 293104  | 12 | Hyperdiploid |
| W05762   | Chromosome 14 open reading frame 147                                                                      | <i>C14orf147</i>         | 171546         | 299664  | 12 | ETV6RUNX1    |
| N43826   | FYN oncogene related to SRC, FGR, YES                                                                     | <i>FYN</i>               | 2534           | 271683  | 12 | Hyperdiploid |
| R28004   | 515259 & 546511                                                                                           | <i>SSBP4 &amp; DISP2</i> | 170463 & 85455 | 133930  | 12 | TCF3PBX1     |
| T85999   | Mastermind-like 2 (Drosophila)                                                                            | <i>MAML2</i>             | 84441          | 112456  | 12 | TCF3PBX1     |
| AA458509 | Hypothetical LOC388134                                                                                    | <i>0</i>                 | 388134         | 811562  | 12 | TCF3PBX1     |
| H16256   | Hypothetical protein FLJ20397                                                                             | <i>FLJ20397</i>          | 54919          | 47647   | 12 | TCF3PBX1     |
| W24806   | Myosin IB                                                                                                 | <i>MYO1B</i>             | 4430           | 308231  | 12 | TCF3PBX1     |
| AI950935 | Tumor protein p53 binding protein, 1                                                                      | <i>TP53BP1</i>           | 7158           | 2548134 | 12 | Hyperdiploid |
| AW006793 | Peroxiredoxin 2                                                                                           | <i>PRDX2</i>             | 7001           | 2506776 | 12 | TCF3PBX1     |
| BX106334 | Melan-A                                                                                                   | <i>MLANA</i>             | 2315           | 269124  | 12 | ETV6RUNX1    |
| AA460143 | Glucosamine-6-phosphate deaminase 1                                                                       | <i>GNPDA1</i>            | 10007          | 795882  | 12 | Hyperdiploid |

|          |                                                                                                                  |                            |               |         |    |              |
|----------|------------------------------------------------------------------------------------------------------------------|----------------------------|---------------|---------|----|--------------|
| AA677662 | Hypothetical protein MGC35440                                                                                    | <i>LOC147991</i>           | 147991        | 460440  | 12 | ETV6RUNX1    |
| R08679   | Abhydrolase domain containing 6                                                                                  | <i>ABHD6</i>               | 57406         | 127447  | 12 | ETV6RUNX1    |
| R35848   | Membrane-bound transcription factor protease, site 2                                                             | <i>MBTPS2</i>              | 51360         | 38450   | 12 | Hyperdiploid |
| AA664237 | Synaptopodin                                                                                                     | <i>SYNPO</i>               | 11346         | 855610  | 12 | TCF3PBX1     |
| AA465258 | Non-SMC element 1 homolog ( <i>S. cerevisiae</i> )                                                               | <i>NSMCE1</i>              | 197370        | 815017  | 12 | TCF3PBX1     |
| N59295   | Chromosome 12 open reading frame 2                                                                               | <i>C12orf2</i>             | 11228         | 289794  | 12 | ETV6RUNX1    |
| N53376   | Phosphoinositide-3-kinase, regulatory subunit 5, p101                                                            | <i>PIK3R5</i>              | 23533         | 284004  | 12 | TCF3PBX1     |
| N48017   | Hypothetical protein LOC550643                                                                                   | <i>0</i>                   | 550643        | 272049  | 12 | Hyperdiploid |
| CR736732 | 6-phosphofructo-2-kinase/fructose-2,6-biphosphatase 2                                                            | <i>PFKFB2</i>              | 5208          | 325526  | 12 | ETV6RUNX1    |
| AA197344 | Phosphoribosyl pyrophosphate synthetase 2                                                                        | <i>PRPS2</i>               | 5634          | 627688  | 12 | Hyperdiploid |
| AA430546 | KIAA0056 protein                                                                                                 | <i>KIAA0056</i>            | 23310         | 770066  | 11 | TCF3PBX1     |
| H09913   | Cytoplasmic FMR1 interacting protein 2                                                                           | <i>CYFIP2</i>              | 26999         | 46896   | 11 | TCF3PBX1     |
| W75938   | Cathepsin L-like 3                                                                                               | <i>CTSL</i>                | 1514          | 345538  | 11 | TCF3PBX1     |
| AA455521 | 443072 & 445758                                                                                                  | <i>0 &amp; E2F5</i>        | 401466 & 1875 | 809828  | 11 | Hyperdiploid |
| AA147452 | Pituitary tumor-transforming 1 interacting protein                                                               | <i>PTTG1IP</i>             | 754           | 505491  | 11 | Hyperdiploid |
| AA664004 | Tripeptidyl peptidase I                                                                                          | <i>TPP1</i>                | 1200          | 855385  | 11 | TCF3PBX1     |
| N63968   | 369761 & 555886                                                                                                  | <i>DAZAP2 &amp; POU6F1</i> | 9802 & 5463   | 289447  | 11 | Hyperdiploid |
| H95960   | Secreted protein, acidic, cysteine-rich (osteonectin) Similar to Sorbitol dehydrogenase (L-itol 2-dehydrogenase) | <i>SPARC</i>               | 6678          | 250654  | 11 | Hyperdiploid |
| AA700604 | SWI/SNF related, matrix associated, actin dependent regulator of chromatin, subfamily a, member 4                | <i>0</i>                   | 116166        | 433350  | 11 | ETV6RUNX1    |
| H20774   | Transcribed locus, weakly similar to XP_496299.1 PREDICTED: hypothetical protein LOC148206 [Homo sapiens]        | <i>SMARCA4</i>             | 6597          | 173169  | 11 | Hyperdiploid |
| AA152303 | Hypothetical protein LOC162073                                                                                   | <i>0</i>                   | 0             | 491237  | 11 | ETV6RUNX1    |
| AA045399 | Hypothetical protein LOC162073                                                                                   | <i>LOC162073</i>           | 162073        | 487831  | 11 | ETV6RUNX1    |
| N66008   | Tumor suppressor candidate 3                                                                                     | <i>TUSC3</i>               | 7991          | 293859  | 11 | ETV6RUNX1    |
| R26176   | Signal transducer and activator of transcription 5B                                                              | <i>STAT5B</i>              | 6777          | 132857  | 11 | TCF3PBX1     |
| R93279   | 415117 & 557045                                                                                                  | <i>SIAT9 &amp; 0</i>       | 8869 & 0      | 275798  | 11 | TCF3PBX1     |
| T97800   | SH3 and multiple ankyrin repeat domains 3                                                                        | <i>SHANK3</i>              | 85358         | 121540  | 11 | TCF3PBX1     |
| BX113579 | Zinc finger protein 516                                                                                          | <i>ZNF516</i>              | 9658          | 341317  | 11 | TCF3PBX1     |
| N32396   | FYN oncogene related to SRC, FGR, YES                                                                            | <i>FYN</i>                 | 2534          | 267431  | 11 | Hyperdiploid |
| AA024656 | Catenin (cadherin-associated protein), delta 1                                                                   | <i>CTNND1</i>              | 1500          | 364921  | 11 | ETV6RUNX1    |
| R10138   | 33446 & 146668                                                                                                   | <i>NR5A2 &amp; TDE2</i>    | 2494 & 57515  | 128457  | 11 | TCF3PBX1     |
| AW074999 | Fc fragment of IgG, receptor, transporter, alpha                                                                 | <i>FCGR1</i>               | 2217          | 2572285 | 11 | TCF3PBX1     |
| AW057930 | Unc-13 homolog B ( <i>C. elegans</i> )                                                                           | <i>UNC13B</i>              | 10497         | 2541460 | 11 | Hyperdiploid |
| AI985214 | Tissue factor pathway inhibitor (lipoprotein-associated coagulation inhibitor)                                   | <i>TFPI</i>                | 7035          | 2495781 | 11 | ETV6RUNX1    |
| AI948737 | V-ras simian leukemia viral oncogene homolog B (ras related; GTP binding protein)                                | <i>RALB</i>                | 5899          | 2472305 | 11 | TCF3PBX1     |
| R67222   | Chromosome 6 open reading frame 192                                                                              | <i>C6orf192</i>            | 116843        | 140852  | 11 | ETV6RUNX1    |
| AA887320 | SH3 multiple domains 1                                                                                           | <i>SH3MD1</i>              | 9644          | 1500815 | 11 | TCF3PBX1     |
| AA975768 | Epithelial membrane protein 1                                                                                    | <i>EMP1</i>                | 2012          | 1589468 | 11 | Hyperdiploid |
| AA449133 | CTP synthase                                                                                                     | <i>CTPS</i>                | 1503          | 785389  | 11 | TCF3PBX1     |
| AA053865 | Tribbles homolog 2 ( <i>Drosophila</i> )                                                                         | <i>TRIB2</i>               | 28951         | 380462  | 11 | TCF3PBX1     |
| AI017283 | Angiotensin like 1                                                                                               | <i>AMOTL1</i>              | 154810        | 1638584 | 11 | TCF3PBX1     |
| AI001010 | A disintegrin-like and metalloprotease (reprolysin type) with thrombospondin type 1 motif, 7                     | <i>ADAMTS7</i>             | 11173         | 1609975 | 11 | ETV6RUNX1    |
| AA935533 | E2F transcription factor 6                                                                                       | <i>E2F6</i>                | 1876          | 1557277 | 11 | ETV6RUNX1    |
| AA917731 | RAB3A interacting protein (rabin3)                                                                               | <i>RAB3IP</i>              | 117177        | 1527297 | 11 | ETV6RUNX1    |
| BX105103 | Leucine rich repeat containing 28                                                                                | <i>LRRC28</i>              | 123355        | 198694  | 11 | TCF3PBX1     |
| R23083   | Moesin                                                                                                           | <i>MSN</i>                 | 4478          | 131362  | 11 | TCF3PBX1     |
| AA044579 | Kynurenine 3-monoxygenase (kynurenine 3-hydroxylase)                                                             | <i>KMO</i>                 | 8564          | 486710  | 11 | TCF3PBX1     |
| R08679   | Abhydrolase domain containing 6                                                                                  | <i>ABHD6</i>               | 57406         | 127447  | 11 | Hyperdiploid |

|          |                                                                                                         |                           |              |         |    |              |
|----------|---------------------------------------------------------------------------------------------------------|---------------------------|--------------|---------|----|--------------|
| T75249   | Haloacid dehalogenase-like hydrolase domain containing 1A                                               | <i>HDHD1A</i>             | 8226         | 22893   | 11 | Hyperdiploid |
| T85958   | Glutamate dehydrogenase 1                                                                               | <i>GLUD1</i>              | 2746         | 112785  | 11 | Hyperdiploid |
| BX103040 | A kinase (PRKA) anchor protein (gravin) 12                                                              | <i>AKAP12</i>             | 9590         | 784772  | 11 | Hyperdiploid |
| H68845   | Peroxiredoxin 2                                                                                         | <i>PRDX2</i>              | 7001         | 212165  | 11 | TCF3PBX1     |
| H96235   | V-ets erythroblastosis virus E26 oncogene homolog 2 (avian)                                             | <i>ETS2</i>               | 2114         | 260303  | 11 | TCF3PBX1     |
| AA887201 | Chromosome 13 open reading frame 1                                                                      | <i>C13orf1</i>            | 57213        | 1501998 | 11 | ETV6RUNX1    |
| AA059378 | Guanylate cyclase activator 1A (retina)                                                                 | <i>GUCA1A</i>             | 2978         | 381866  | 11 | TCF3PBX1     |
| AA491107 | KIAA0685                                                                                                | <i>KIAA0685</i>           | 9701         | 824557  | 11 | ETV6RUNX1    |
| AA491107 | KIAA0685                                                                                                | <i>KIAA0685</i>           | 9701         | 824557  | 11 | Hyperdiploid |
| AA663941 | LOC387882 hypothetical protein                                                                          | <i>LOC387882</i>          | 387882       | 855707  | 11 | Hyperdiploid |
| AA496795 | Intersectin 1 (SH3 domain protein)                                                                      | <i>ITSN1</i>              | 6453         | 897652  | 11 | Hyperdiploid |
| BX090399 | Chromobox homolog 5 (HP1 alpha homolog, Drosophila)                                                     | <i>CBX5</i>               | 23468        | 452483  | 11 | ETV6RUNX1    |
| N40940   | Transmembrane protein with EGF-like and two follistatin-like domains 1                                  | <i>TMEFF1</i>             | 8577         | 277165  | 11 | Hyperdiploid |
| AA485439 | Chromosome 1 open reading frame 121                                                                     | <i>PNAS-4</i>             | 51029        | 811058  | 11 | TCF3PBX1     |
| AA292283 | PHD finger protein 2                                                                                    | <i>PHF2</i>               | 5253         | 725841  | 11 | TCF3PBX1     |
| R88680   | Hypothetical protein MGC10485                                                                           | <i>MGC10485</i>           | 112936       | 166530  | 11 | ETV6RUNX1    |
| N31587   | Interleukin-1 receptor-associated kinase 3                                                              | <i>IRAK3</i>              | 11213        | 271748  | 11 | ETV6RUNX1    |
| AA416685 | Unc-13 homolog B (C. elegans)                                                                           | <i>UNC13B</i>             | 10497        | 731257  | 11 | Hyperdiploid |
| AA888182 | Ribosomal protein S4, X-linked                                                                          | <i>RPS4X</i>              | 6191         | 1492147 | 11 | Hyperdiploid |
| AA479102 | Protein kinase C, beta 1                                                                                | <i>PRKCB1</i>             | 5579         | 753923  | 11 | TCF3PBX1     |
| AA424629 | Latent transforming growth factor beta binding protein 2                                                | <i>LTBP2</i>              | 4053         | 767202  | 11 | TCF3PBX1     |
| BX098872 | Hypothetical gene supported by BC041875; BX648984                                                       | <i>0</i>                  | 400642       | 767347  | 11 | TCF3PBX1     |
| AA421850 | Hypothetical protein MGC4308                                                                            | <i>MGC4308</i>            | 84319        | 754588  | 11 | TCF3PBX1     |
| AA452725 | Nucleobindin 1                                                                                          | <i>NUCB1</i>              | 4924         | 788472  | 11 | TCF3PBX1     |
| AA460115 | Ornithine decarboxylase 1                                                                               | <i>ODC1</i>               | 4953         | 796646  | 11 | TCF3PBX1     |
| AA418095 | 508021 & 516808                                                                                         | <i>RCBTB1 &amp; PDE6D</i> | 55213 & 5147 | 767422  | 11 | TCF3PBX1     |
| CR736732 | 6-phosphofructo-2-kinase/fructose-2,6-biphosphatase 2                                                   | <i>PFKFB2</i>             | 5208         | 325526  | 11 | TCF3PBX1     |
| BX089808 | Hypothetical protein LOC285812                                                                          | <i>LOC285812</i>          | 285812       | 32522   | 11 | TCF3PBX1     |
| W24873   | Fucosidase, alpha-L- 1, tissue                                                                          | <i>FUCA1</i>              | 2517         | 308437  | 11 | TCF3PBX1     |
| AA029842 | Mature T cell proliferation 1                                                                           | <i>MTCP1</i>              | 4515         | 470175  | 11 | Hyperdiploid |
| AA429946 | Dehydrogenase/reductase (SDR family) member 4                                                           | <i>DHRS4</i>              | 10901        | 781295  | 11 | ETV6RUNX1    |
| N35592   | Hypothetical protein Eils1                                                                              | <i>Eils1</i>              | 222166       | 272262  | 10 | ETV6RUNX1    |
| AA099522 | MORC family CW-type zinc finger 4                                                                       | <i>ZCWC2</i>              | 79710        | 489594  | 10 | ETV6RUNX1    |
| CR748825 | Tumor necrosis factor receptor superfamily, member 10c, decoy without an intracellular domain           | <i>TNFRSF10C</i>          | 8794         | 2108257 | 10 | ETV6RUNX1    |
| AW075557 | Bromodomain adjacent to zinc finger domain, 2A RNA binding motif, single stranded interacting protein 1 | <i>BAZ2A</i>              | 11176        | 2577057 | 10 | ETV6RUNX1    |
| T63461   |                                                                                                         | <i>RBMS1</i>              | 5937         | 80030   | 10 | ETV6RUNX1    |
| AA465494 | Acyl-CoA synthetase long-chain family member 5                                                          | <i>ACSL5</i>              | 51703        | 814053  | 10 | TCF3PBX1     |
| BX108643 | Cyclin C                                                                                                | <i>CCNC</i>               | 892          | 789318  | 10 | Hyperdiploid |
| AA775239 | Tetraspanin 9                                                                                           | <i>NET5</i>               | 10867        | 878572  | 10 | ETV6RUNX1    |
| AA001874 | Solute carrier family 9 (sodium/hydrogen exchanger), isoform 9                                          | <i>SLC9A9</i>             | 285195       | 428163  | 10 | TCF3PBX1     |
| AA256132 | Interleukin 1 receptor accessory protein                                                                | <i>IL1RAP</i>             | 3556         | 681917  | 10 | ETV6RUNX1    |
| A1952526 | FYN oncogene related to SRC, FGR, YES                                                                   | <i>FYN</i>                | 2534         | 2549448 | 9  | Hyperdiploid |
| BX096730 | Transgelin 3                                                                                            | <i>TAGLN3</i>             | 29114        | 325160  | 9  | ETV6RUNX1    |
| N62311   | Myozenin 3                                                                                              | <i>MYOZ3</i>              | 91977        | 287791  | 9  | ETV6RUNX1    |
| N52162   | Protein kinase (cAMP-dependent, catalytic) inhibitor alpha                                              | <i>PKIA</i>               | 5569         | 284401  | 8  | Hyperdiploid |
| H59805   | IGF-II mRNA-binding protein 1                                                                           | <i>IMP-1</i>              | 10642        | 208078  | 8  | Hyperdiploid |
| AA449326 | Thyroid hormone receptor associated protein 2                                                           | <i>THRAP2</i>             | 23389        | 785710  | 8  | TCF3PBX1     |

|          |                                                                                                          |                              |               |         |   |              |
|----------|----------------------------------------------------------------------------------------------------------|------------------------------|---------------|---------|---|--------------|
| AA489290 | FERM, RhoGEF (ARHGEF) and pleckstrin domain protein 1 (chondrocyte-derived)                              | <i>FARP1</i>                 | 10160         | 842918  | 8 | Hyperdiploid |
| AA456101 | Phosphoinositide-3-kinase, class 3                                                                       | <i>PIK3C3</i>                | 5289          | 813536  | 7 | ETV6RUNX1    |
| AA429248 | HGFL gene                                                                                                | <i>MGC17330</i>              | 113791        | 769796  | 7 | TCF3PBX1     |
| AA464688 | OCIA domain containing 2                                                                                 | <i>OCIAD2</i>                | 132299        | 810218  | 7 | ETV6RUNX1    |
| AI537061 | Sex comb on midleg-like 1 (Drosophila)                                                                   | <i>SCML1</i>                 | 6322          | 2184814 | 7 | Hyperdiploid |
| AA013172 | Suppressor of Ty 3 homolog (S. cerevisiae)                                                               | <i>SUPT3H</i>                | 8464          | 361028  | 7 | Hyperdiploid |
| W01471   | Tripartite motif-containing 10                                                                           | <i>TRIM10</i>                | 10107         | 294655  | 7 | Hyperdiploid |
| AA070661 | S100 calcium binding protein A13                                                                         | <i>S100A13</i>               | 6284          | 530035  | 7 | Hyperdiploid |
| R48131   | 167679 & 434946                                                                                          | <i>SH3BP2 &amp; 0</i>        | 6452 & 0      | 153694  | 6 | ETV6RUNX1    |
| AA701976 | Inositol 1,4,5-triphosphate receptor, type 3                                                             | <i>ITPR3</i>                 | 3710          | 435953  | 6 | ETV6RUNX1    |
| R06438   | Myosin, light polypeptide kinase                                                                         | <i>MYLK</i>                  | 4638          | 126341  | 6 | Hyperdiploid |
| AA455005 | Sorting nexin 9                                                                                          | <i>SNX9</i>                  | 51429         | 811937  | 6 | ETV6RUNX1    |
| AA970972 | SMAD, mothers against DPP homolog 3 (Drosophila)                                                         | <i>SMAD3</i>                 | 4088          | 1575263 | 6 | ETV6RUNX1    |
| AA706987 | UDP-N-acetyl-alpha-D-galactosamine:polypeptide N-acetylgalactosaminyltransferase 1 (GalNAc-T1)           | <i>GALNT1</i>                | 2589          | 431397  | 6 | TCF3PBX1     |
| H98241   | Spectrin, beta, non-erythrocytic 1                                                                       | <i>SPTBN1</i>                | 6711          | 261246  | 5 | Hyperdiploid |
| AA496886 | 369232 & 477425                                                                                          | <i>EPB41L5 &amp; SLC12A8</i> | 57669 & 84561 | 897593  | 5 | ETV6RUNX1    |
| BX117216 | Fusion (involved in t(12;16) in malignant liposarcoma)                                                   | <i>FUS</i>                   | 2521          | 343181  | 4 | Hyperdiploid |
| AA099522 | MORC family CW-type zinc finger 4                                                                        | <i>ZCWC2</i>                 | 79710         | 489594  | 4 | Hyperdiploid |
| AI359066 | Small nuclear ribonucleoprotein polypeptide E                                                            | <i>SNRPE</i>                 | 6635          | 2013064 | 4 | TCF3PBX1     |
| AI971009 | Platelet activating factor acetylhydrolase 2, 40kDa                                                      | <i>PAFAH2</i>                | 5051          | 2488470 | 4 | ETV6RUNX1    |
| N47483   | Glutathione S-transferase A4                                                                             | <i>GSTA4</i>                 | 2941          | 280769  | 4 | ETV6RUNX1    |
| AA453028 | Stromal antigen 3                                                                                        | <i>MGC2463</i>               | 79037         | 788355  | 4 | ETV6RUNX1    |
| AW051907 | KIAA0179                                                                                                 | <i>KIAA0179</i>              | 23076         | 2557117 | 3 | ETV6RUNX1    |
| AI948893 | SH3-domain binding protein 2                                                                             | <i>SH3BP2</i>                | 6452          | 2471503 | 3 | ETV6RUNX1    |
| AA017576 | Pyruvate dehydrogenase kinase, isoenzyme 1                                                               | <i>PKD1</i>                  | 5163          | 361190  | 3 | ETV6RUNX1    |
| R53479   | Hypothetical protein MGC10485                                                                            | <i>MGC10485</i>              | 112936        | 40155   | 3 | ETV6RUNX1    |
| AA608572 | Pyrophosphatase (inorganic)                                                                              | <i>PP</i>                    | 5464          | 950700  | 3 | TCF3PBX1     |
| AA487359 | Dishevelled associated activator of morphogenesis 1                                                      | <i>DAAM1</i>                 | 23002         | 841475  | 3 | ETV6RUNX1    |
| AA429946 | Dehydrogenase/reductase (SDR family) member 4                                                            | <i>DHRS4</i>                 | 10901         | 781295  | 3 | Hyperdiploid |
| AA152346 | Glutathione S-transferase A4                                                                             | <i>GSTA4</i>                 | 2941          | 504791  | 2 | ETV6RUNX1    |
| H08899   | Isopentenyl-diphosphate delta isomerase 1                                                                | <i>IDII</i>                  | 3422          | 44975   | 2 | ETV6RUNX1    |
| AA045057 | Syndecan 2 (heparan sulfate proteoglycan 1, cell surface-associated, fibroglycan)                        | <i>SDC2</i>                  | 6383          | 488873  | 2 | Hyperdiploid |
| AW084720 | Complement component 1, s subcomponent                                                                   | <i>C1S</i>                   | 716           | 2569884 | 2 | ETV6RUNX1    |
| AW051907 | KIAA0179                                                                                                 | <i>KIAA0179</i>              | 23076         | 2557117 | 2 | Hyperdiploid |
| H16890   | Hypothetical protein LOC550643                                                                           | <i>0</i>                     | 550643        | 50339   | 2 | Hyperdiploid |
| AI682474 | Nuclear transport factor 2-like export factor 2                                                          | <i>NXT2</i>                  | 55916         | 2322396 | 2 | TCF3PBX1     |
| AI360738 | KIAA1036                                                                                                 | <i>KIAA1036</i>              | 22846         | 2011138 | 2 | TCF3PBX1     |
| R20402   | Hypothetical protein LOC152485                                                                           | <i>LOC152485</i>             | 152485        | 32776   | 2 | ETV6RUNX1    |
| AA703075 | Pyruvate dehydrogenase kinase, isoenzyme 1                                                               | <i>PKD1</i>                  | 5163          | 436761  | 2 | ETV6RUNX1    |
| R12847   | Dmx-like 2                                                                                               | <i>DMXL2</i>                 | 23312         | 26171   | 2 | ETV6RUNX1    |
| H23561   | Deltex homolog 1 (Drosophila)                                                                            | <i>DTX1</i>                  | 1840          | 52120   | 2 | ETV6RUNX1    |
| AA446028 | Paraoxonase 2                                                                                            | <i>PON2</i>                  | 5445          | 781019  | 2 | Hyperdiploid |
| N30348   | Fms-related tyrosine kinase 1 (vascular endothelial growth factor/vascular permeability factor receptor) | <i>FLT1</i>                  | 2321          | 258101  | 2 | ETV6RUNX1    |
| AA418036 | GLI-Kruppel family member GLI3 (Greig cephalopolysyndactyly syndrome)                                    | <i>GLI3</i>                  | 2737          | 767495  | 2 | TCF3PBX1     |
| R14275   | Cofactor required for Sp1 transcriptional activation, subunit 2, 150kDa                                  | <i>CRSP2</i>                 | 9282          | 28444   | 2 | Hyperdiploid |
| BX102083 | 475970 & 548668                                                                                          | <i>OXSRI &amp; 0</i>         | 9943 & 0      | 198690  | 2 | ETV6RUNX1    |
| N28844   | V-maf musculoaponeurotic fibrosarcoma oncogene homolog G (avian)                                         | <i>MAFG</i>                  | 4097          | 266037  | 1 | Hyperdiploid |
| AA453774 | Regulator of G protein signaling 16                                                                      | <i>RGS16</i>                 | 6004          | 813707  | 1 | ETV6RUNX1    |

|          |                                                                           |                             |               |         |   |              |
|----------|---------------------------------------------------------------------------|-----------------------------|---------------|---------|---|--------------|
| CR743555 | 23581 & 413924                                                            | <i>LEPR &amp; CXCL10</i>    | 3953 & 3627   | 491243  | 1 | TCF3PBX1     |
| W01926   | Membrane-spanning 4-domains, subfamily A, member 6A                       | <i>MS4A6A</i>               | 64231         | 294535  | 1 | Hyperdiploid |
| N66008   | Tumor suppressor candidate 3                                              | <i>TUSC3</i>                | 7991          | 293859  | 1 | Hyperdiploid |
| T95423   | 507452 & 515130                                                           | <i>XPO4 &amp; VANGL1</i>    | 64328 & 81839 | 120749  | 1 | TCF3PBX1     |
| W32777   | Transducin-like enhancer of split 3 (E(sp1) homolog, Drosophila)          | <i>TLE3</i>                 | 7090          | 321574  | 1 | ETV6RUNX1    |
| BX118776 | Chromosome X open reading frame 45                                        | <i>CXorf45</i>              | 79868         | 113298  | 1 | Hyperdiploid |
| R95841   | Ribosomal protein S6 kinase, 90kDa, polypeptide 3                         | <i>RPS6KA3</i>              | 6197          | 199198  | 1 | Hyperdiploid |
| N44673   | ADP-ribosylation factor-like 7                                            | <i>ARL7</i>                 | 10123         | 271952  | 1 | TCF3PBX1     |
| AI983274 | ATPase, H <sup>+</sup> transporting, lysosomal accessory protein 2        | <i>ATP6AP2</i>              | 10159         | 2517344 | 1 | TCF3PBX1     |
| AA478659 | Nidogen 2 (osteonidogen)                                                  | <i>NID2</i>                 | 22795         | 754093  | 1 | TCF3PBX1     |
| AI935306 | WD repeat domain 68                                                       | <i>HAN11</i>                | 10238         | 2465039 | 1 | TCF3PBX1     |
| AI935172 | Oculocerebrorenal syndrome of Lowe                                        | <i>OCRL</i>                 | 4952          | 2464833 | 1 | TCF3PBX1     |
| AI523637 | Protocadherin 9                                                           | <i>PCDH9</i>                | 5101          | 2116531 | 1 | ETV6RUNX1    |
| R87642   | LOC440135                                                                 | <i>0</i>                    | 440135        | 194600  | 1 | ETV6RUNX1    |
| W01471   | Tripartite motif-containing 10                                            | <i>TRIM10</i>               | 10107         | 294655  | 1 | ETV6RUNX1    |
| AI337373 | PHD finger protein 19                                                     | <i>PHF19</i>                | 26147         | 2062453 | 1 | TCF3PBX1     |
| AI245605 | D-aspartate oxidase                                                       | <i>DDO</i>                  | 8528          | 1870049 | 1 | ETV6RUNX1    |
| AA455005 | Sorting nexin 9                                                           | <i>SNX9</i>                 | 51429         | 811937  | 1 | Hyperdiploid |
| AA410481 | KIAA0934                                                                  | <i>KIAA0934</i>             | 22982         | 754451  | 1 | Hyperdiploid |
| BX096730 | Transgelin 3                                                              | <i>TAGLN3</i>               | 29114         | 325160  | 1 | Hyperdiploid |
| AA954947 | Epidermal growth factor (beta-urogastrone)                                | <i>EGF</i>                  | 1950          | 1577736 | 1 | TCF3PBX1     |
| W52208   | Coactosin-like 1 (Dictyostelium)                                          | <i>COTL1</i>                | 23406         | 325370  | 1 | Hyperdiploid |
| N30042   | Clathrin, heavy polypeptide (Hc)                                          | <i>CLTC</i>                 | 1213          | 258547  | 1 | ETV6RUNX1    |
| R23318   | Suppressor of cytokine signaling 2                                        | <i>SOCS2</i>                | 8835          | 131073  | 1 | TCF3PBX1     |
| H08423   | SET and MYND domain containing 2                                          | <i>SMYD2</i>                | 56950         | 45623   | 1 | TCF3PBX1     |
| AA437212 | Adaptor-related protein complex 1, sigma 2 subunit                        | <i>AP1S2</i>                | 8905          | 757428  | 1 | Hyperdiploid |
| AA705153 | Hypothetical protein FLJ10357                                             | <i>FLJ10357</i>             | 55701         | 461613  | 1 | ETV6RUNX1    |
| AA405000 | Ribonuclease T2                                                           | <i>RNASET2</i>              | 8635          | 712341  | 1 | TCF3PBX1     |
| AA504232 | High-mobility group 20A                                                   | <i>HMG20A</i>               | 10363         | 825036  | 1 | ETV6RUNX1    |
| AA782314 | Hypothetical protein MGC35440                                             | <i>LOC147991</i>            | 147991        | 857574  | 1 | Hyperdiploid |
| AA677572 | PET112-like (yeast)                                                       | <i>PET112L</i>              | 5188          | 455263  | 1 | ETV6RUNX1    |
| AA521384 | Solute carrier family 39 (zinc transporter), member 8                     | <i>SLC39A8</i>              | 64116         | 826995  | 1 | ETV6RUNX1    |
| AA281346 | Chromosome X open reading frame 45                                        | <i>CXorf45</i>              | 79868         | 705188  | 1 | Hyperdiploid |
| N70078   | Dedicator of cytokinesis 9                                                | <i>DOCK9</i>                | 23348         | 297940  | 1 | TCF3PBX1     |
| T46897   | Adhesion regulating molecule 1                                            | <i>ADRM1</i>                | 11047         | 78869   | 1 | TCF3PBX1     |
| BX107484 | Hypothetical protein LOC284749                                            | <i>LOC284749</i>            | 284749        | 294381  | 1 | TCF3PBX1     |
| AA718910 | MAD1 mitotic arrest deficienT like 1 (yeast)                              | <i>MAD1L1</i>               | 8379          | 1292432 | 1 | TCF3PBX1     |
| AA417921 | 85201 & 194694                                                            | <i>CLECSF2 &amp; MAP3K6</i> | 9976 & 9064   | 767405  | 1 | TCF3PBX1     |
| AA460074 | Protein kinase, cAMP-dependent, catalytic, beta                           | <i>PRKACB</i>               | 5567          | 796442  | 1 | TCF3PBX1     |
| BX113274 | CDNA: FLJ22994 fis, clone KAT11918                                        | <i>0</i>                    | 0             | 823853  | 1 | ETV6RUNX1    |
| AA418780 | IQ motif and Sec7 domain 1                                                | <i>IQSEC1</i>               | 9922          | 767819  | 1 | TCF3PBX1     |
| AA485909 | Prostatic binding protein                                                 | <i>PBP</i>                  | 5037          | 843134  | 1 | TCF3PBX1     |
| AA599127 | Superoxide dismutase 1, soluble (amyotrophic lateral sclerosis 1 (adult)) | <i>SOD1</i>                 | 6647          | 950489  | 1 | Hyperdiploid |
| AA056375 | Hypothetical protein from clone 643                                       | <i>LOC57228</i>             | 57228         | 509458  | 1 | Hyperdiploid |
| AA147338 | Hypothetical protein FLJ11506                                             | <i>FLJ11506</i>             | 79719         | 589232  | 1 | TCF3PBX1     |
| AA169699 | Hypothetical protein FLJ11171                                             | <i>FLJ11171</i>             | 55783         | 609910  | 1 | TCF3PBX1     |
| AA053474 | Hypothetical protein FLJ14166                                             | <i>FLJ14166</i>             | 79616         | 509988  | 1 | Hyperdiploid |
| AA608534 | Chromosome 1 open reading frame 121                                       | <i>PNAS-4</i>               | 51029         | 950600  | 1 | TCF3PBX1     |
| T60664   | AHNAK nucleoprotein (desmoyokin)                                          | <i>MGC5395</i>              | 79026         | 79216   | 1 | TCF3PBX1     |



|          |                                                                                                             |                  |       |        |   |              |
|----------|-------------------------------------------------------------------------------------------------------------|------------------|-------|--------|---|--------------|
| T60160   | GABA(A) receptor-associated protein like 1                                                                  | <i>GABARAPLI</i> | 23710 | 81409  | 1 | TCF3PBX1     |
| AA126799 | Glycosyltransferase 28 domain containing 1                                                                  | <i>GLT28DI</i>   | 55849 | 490548 | 1 | Hyperdiploid |
| BX104789 | Carboxypeptidase X (M14 family)                                                                             | <i>CPXM</i>      | 56265 | 898044 | 1 | Hyperdiploid |
| AA485353 | Lectin, galactoside-binding, soluble, 3 binding protein<br>Transcribed locus, weakly similar to XP_209041.2 | <i>LGALS3BP</i>  | 3959  | 811000 | 1 | Hyperdiploid |
| AA461274 | PREDICTED: similar to KIAA1503 protein [Homo sapiens]                                                       | 0                | 0     | 796127 | 1 | Hyperdiploid |
