# Supplementary material
Source: PubMed Central journal article supplement (PMC1323166)
Supplement: pnas_0506637102_34.pdf [file pnas_0506637102_34.pdf]

**Table 1. Cytogenetic features of the 121 acute leukemias**

| Cytogenetics      | • No. of cases | • AML | • Morphology  |            |
|-------------------|----------------|-------|---------------|------------|
|                   |                |       | B lineage ALL | T cell ALL |
| Hyperdiploid >50  | 29             | –     | 29            | –          |
| t(12;21)(p13;q22) | 20             | –     | 20            | –          |
| Normal karyotype  | 14             | 1     | 7             | 6          |
| 11q23/MLL         | 12             | 10    | 2             | –          |
| t(1;19)(q23;p13)  | 6              | –     | 6             | –          |
| t(9;22)(q34;q11)  | 3              | –     | 3             | –          |
| t(8;14)(q24;q32)  | 2              | –     | 2             | –          |
| t(8;21)(q22;q22)  | 2              | 2     | –             | –          |
| t(15;17)(q22;q12) | 1              | 1     | –             | –          |
| Failure           | 6              | –     | 6             | –          |
| Other             | 26             | 9     | 12            | 5          |
| • Total           | 121            | 24    | 87            | 11         |
