# Supplementary material
Source: PubMed Central journal article supplement (PMC1323166)

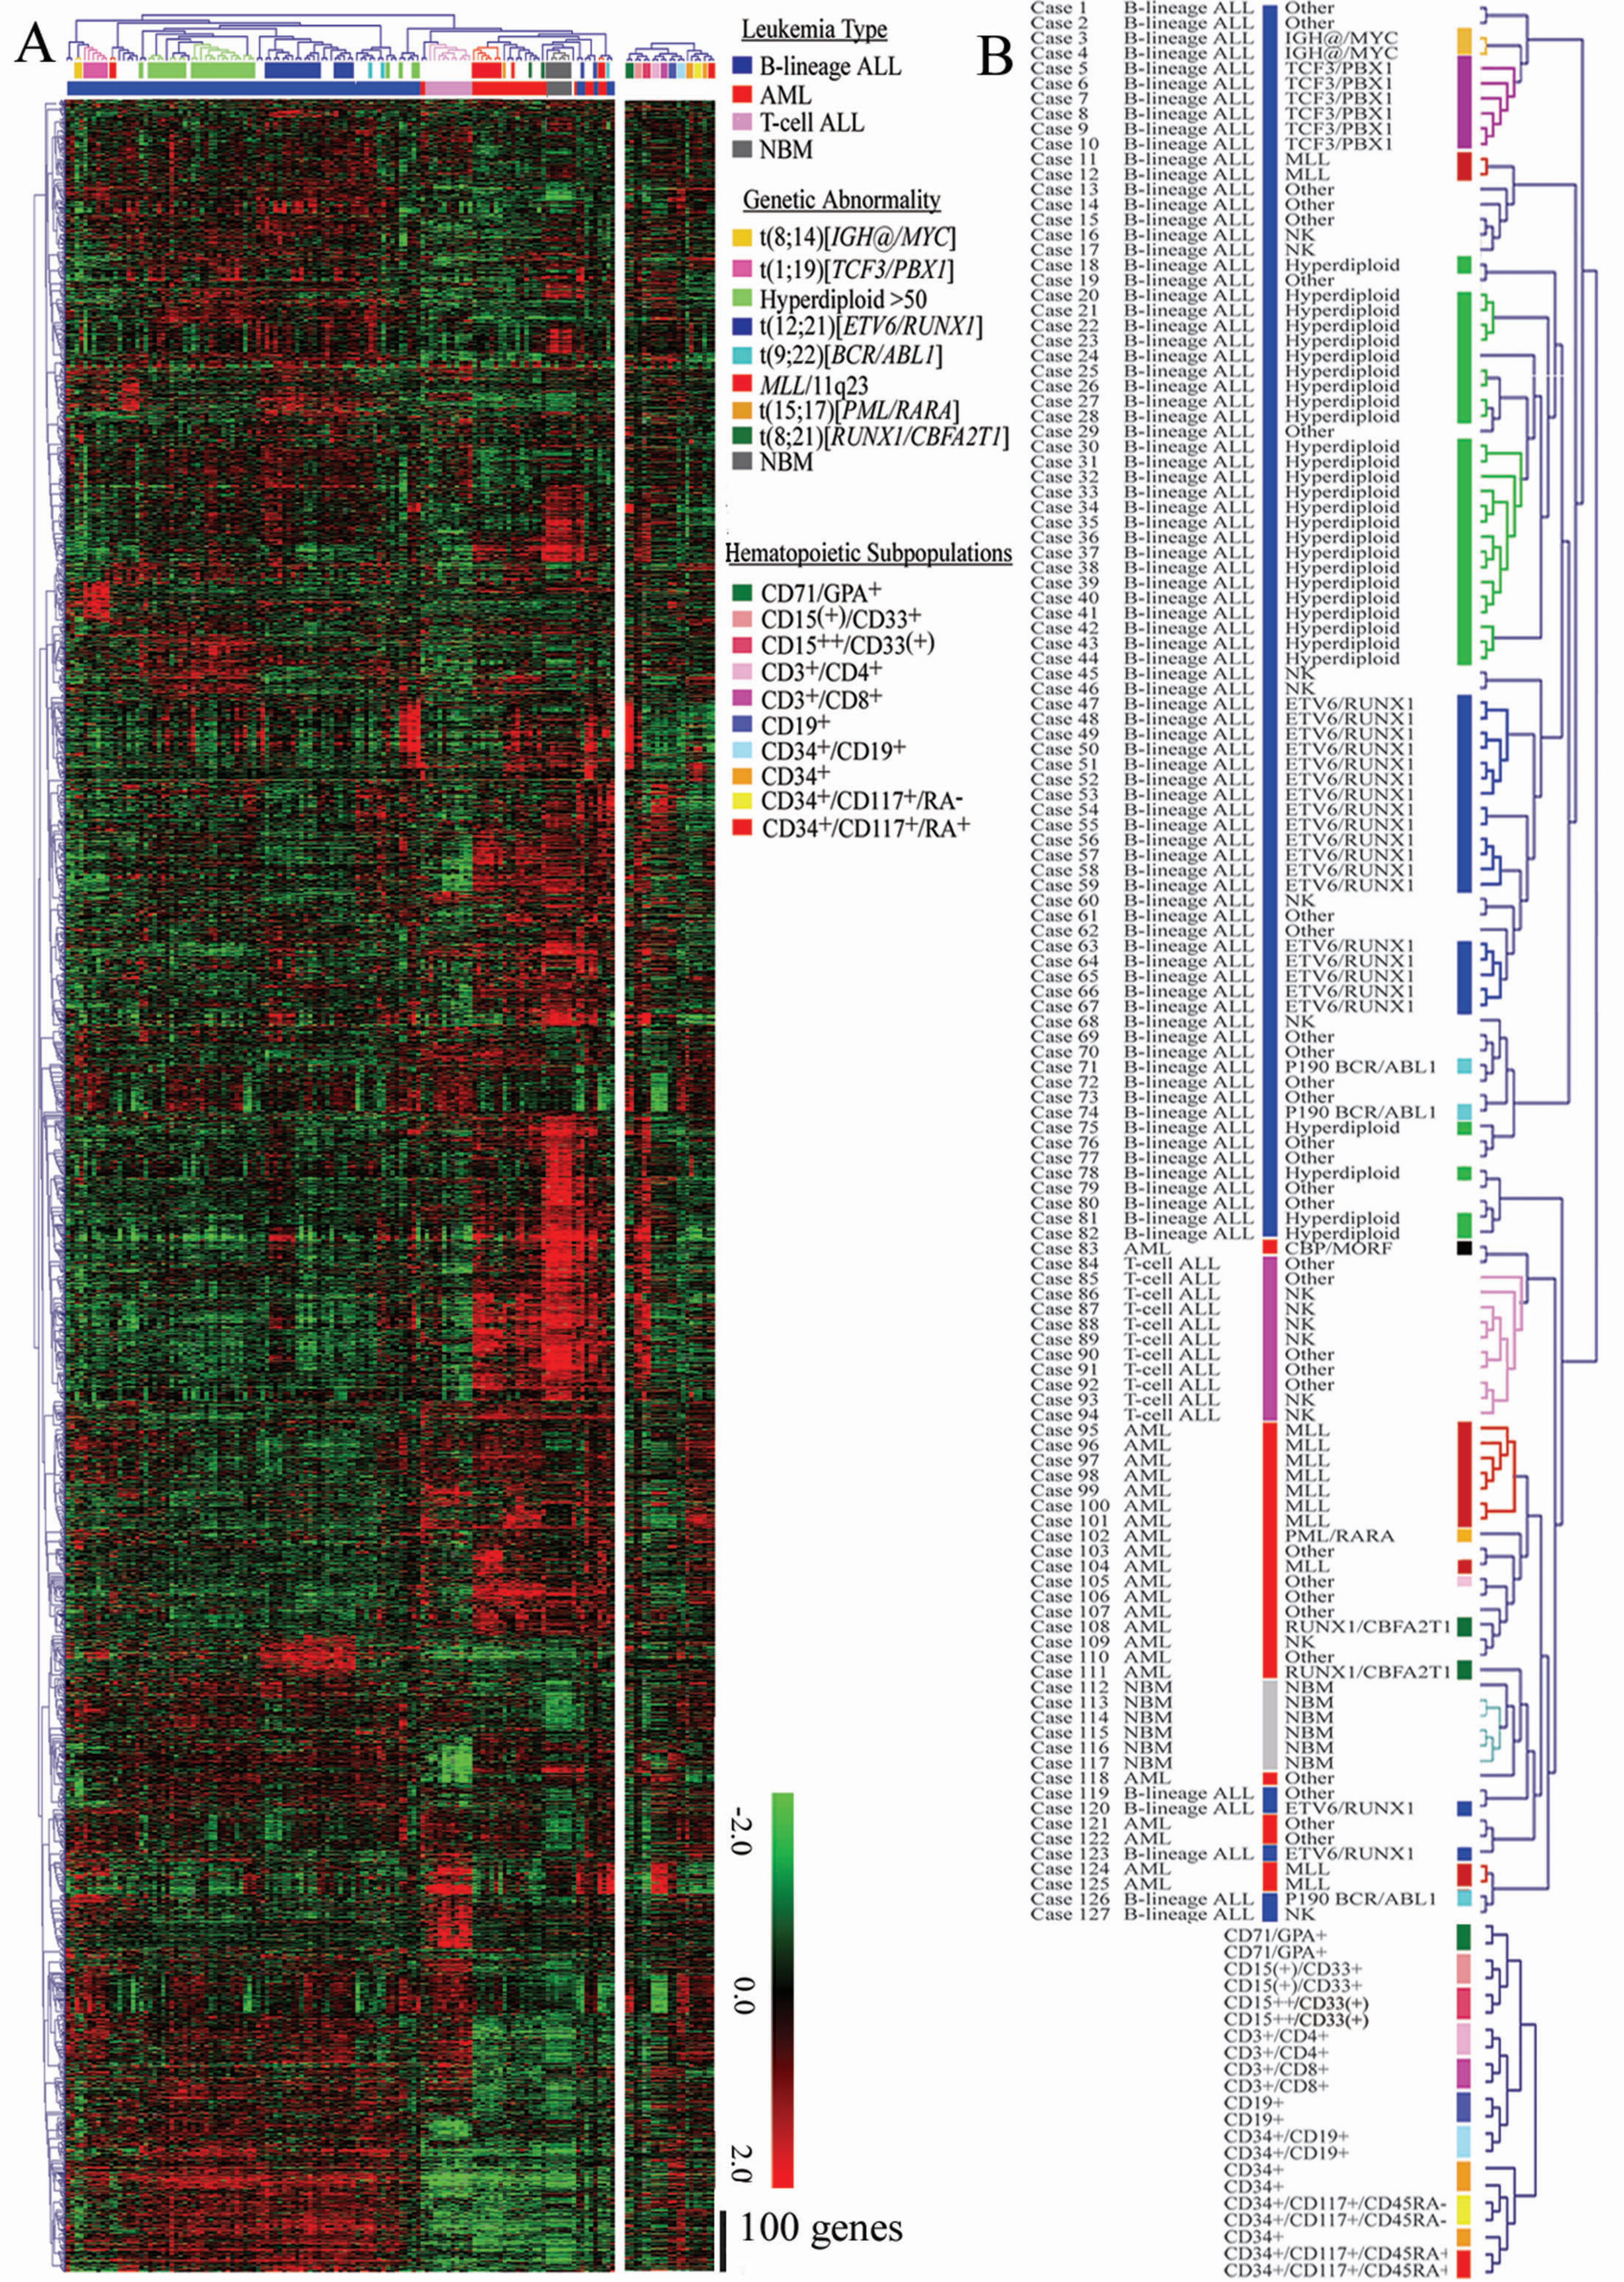

Supplement: pnas_0506637102_35.pdf [file pnas_0506637102_35.pdf]

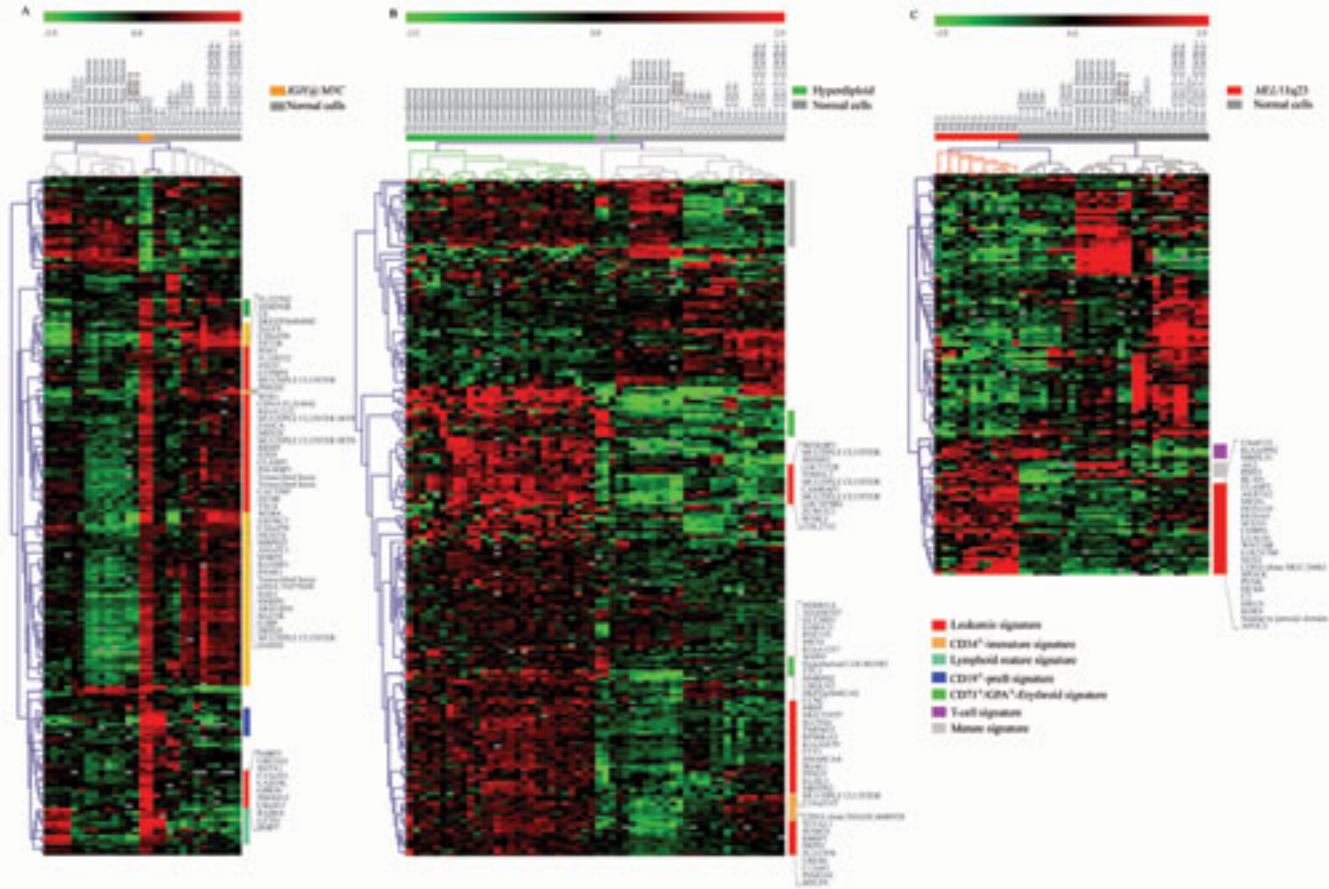

Supplement: pnas_0506637102_38.pdf [file pnas_0506637102_38.pdf]
